# Supplementary material for: Respiratory microbiome dysbiosis and temporal dynamics in individuals with asthma.
Source: Research Square preprint supplement (doi:10.21203/rs.3.rs-1580980/v1), 2022-05-10
Supplement: Supplementary file 1 [file Supplementary data File 1.xlsx]

## Sheet: Sheet1
	l1	0.1				0.2					0.3						0.4						0.5						0.6						0.7						0.8						0.9
	l2	1	2	3	4	1	2	3	4	5	1	2	3	4	5	6	1	2	3	4	5	6	1	2	3	4	5	6	1	2	3	4	5	6	1	2	3	4	5	6	1	2	3	4	5	6	1	2	3
Species name	Taxon id
Massilia sp. JS1662	1519190	0.149704	0.125371	0.0888503	0.0137981	0.133529	0.12665	0.168252	0.059795	0.0158446	0.130573	0.176841	0.133694	0.0499075	0.0152531	0.120288	0.12682	0.175709	0.133733	0.049636	0.0158426	0.119573
Cronobacter malonaticus	413503	0.0473878	0.0313859	0.0370722	0.0205887
Spirobacillus cienkowskii	495820	0.128458	0.109999	0.0503272	0.0272564	0.109118	0.133639	0.10701	0.0455846	0.0274469	0.110225	0.107895	0.152467	0.0453019	0.0202658	0.0945285	0.107154	0.107405	0.152487	0.0449724	0.0210836	0.0939342
Streptococcus suis	1307	0.027141	0.0257598	0.018649	0.0206686
Leptosphaeria maculans	5022	0.19481	0.239193	0.0989351	0.0593827	0.24938	0.205659	0.178842	0.0922654	0.0571167	0.247499	0.189767	0.240212	0.0881424	0.0515408	0.134545	0.239338	0.18867	0.240295	0.0877474	0.0536126	0.133732	0.236795	0.091744	0.18052	0.23752	0.132572	0.040465	0.234532	0.183228	0.2348	0.0977093	0.0479059	0.136247
Enterococcus hirae	1354	1.8182	1.89113	0.787505	0.294354	1.88859	1.80184	1.91323	0.657303	0.282949	1.8374	2.17104	2.33259	0.611263	0.260941	1.18561	1.76646	2.1354	2.3363	0.604372	0.257206	1.16343	1.71192	0.548576	2.01271	2.26054	1.13473	0.237387	1.66249	2.0475	2.18644	0.667017	0.260887	1.10356	1.63168	2.00229	2.14028	0.660087	0.25992	1.08645	1.55455	1.89853	0.583693	2.02919	0.248435	1.04471	1.45709	1.76707	0.57369
Emiliania huxleyi	2903	0.0983442	0.10098	0.0414406	0.0239552	0.0880034	0.114576	0.0873532	0.0502967	0.0159395	0.09388	0.0853441	0.124553	0.0496342	0.0204874	0.0534612
Propionibacterium virus P105	1982261	0.0548734	0.0296504	0.000495126	0.00034513
Geodermatophilaceae bacterium URHB0062	1380353	0.252109	0.292094	0.181088	0.0803688	0.282864	0.28893	0.237028	0.172039	0.0739175	0.279976	0.25522	0.314813	0.152985	0.0739803	0.216457	0.278788	0.253616	0.314951	0.15222	0.0702571	0.214962	0.275497	0.143421	0.249502	0.311022	0.212948	0.0611279	0.272655	0.24846	0.306845	0.172023	0.0627046	0.21239	0.270756	0.246489	0.304293	0.171206	0.0625913	0.211135	0.265912	0.241591	0.14343	0.298412	0.0748344	0.208064
Streptococcus thermophilus	1308	57.4425	78.7819	19.9838	2.044	81.3029	63.7845	56.5302	15.6294	1.76284	77.3362	67.6899	96.37	13.8002	1.40149	27.1214	73.4627	66.3214	96.5374	13.4694	1.34095	26.3611	70.4417	11.0766	61.4049	92.695	25.3753	1.0376	67.7437	62.9688	88.8496	16.2392	1.42983	24.3138	66.0397	61.2274	86.5666	15.9215	1.41393	23.7265	61.8153	57.1721	12.6241	80.8995	1.19299	22.3151	56.5011	52.0413	12.1202
Mediterraneibacter butyricigenes	2316025	0.0659843	0.0625876	0.0460691	0.0307053	0.0596139	0.0735556	0.0696044	0.0322208	0.0313863
Paenibacillus odorifer	189426	14.4509	20.5136	4.39744	0.744834	21.2387	16.4337	14.0054	3.35112	0.683803	20.4537	16.828	23.7518	2.9218	0.595882	7.46013	19.2325	16.4953	23.792	2.86034	0.58533	7.26129	18.4555	2.44251	15.2672	22.8633	7.0037	0.501765	17.7649	15.6781	21.9332	3.42208	0.59642	6.70744	17.3283	15.2546	21.3753	3.36177	0.592061	6.55388	16.2455	14.2694	2.73971	20.0007	0.539242	6.18547	14.8793	13.0232	2.66966
Paxillus involutus	71150	0.105355	0.0723817	0.0363349	0.0239703	0.0761102	0.0906921	0.0994383	0.0409971	0.0158446	0.0782576	0.094603	0.0963742	0.041177	0.0153274	0.0744981
Herbaspirillum rubrisubalbicans	80842	0.0445815	0.0484132	0.0414942	0.0243662	0.0519419	0.0489378	0.0445203	0.0371068	0.0200846
Nannocystis exedens	54	0.322518	0.377931	0.24881	0.125386	0.385146	0.330971	0.328267	0.231214	0.120745	0.370898	0.357021	0.400388	0.216242	0.110371	0.252545	0.362904	0.354468	0.400629	0.215074	0.108518	0.250636	0.357903	0.209759	0.349555	0.394796	0.248106	0.0884791	0.353495	0.348029	0.388882	0.232283	0.107468	0.246675	0.350556	0.344807	0.385312	0.231091	0.10722	0.245086	0.34328	0.336912	0.214535	0.376462	0.101613	0.241269	0.333724	0.326987	0.212684
Mollisia scopiformis	149040	0.0657818	0.0486106	0.0274029	0.0104319	0.0485245	0.0451554	0.0852129	0.0182454	0.0119832
Bipolaris sorokiniana	45130	0.0506214	0.0400142	0.0229734	0.00705548
Clohesyomyces aquaticus	1231657	0.0268637	0.0342726	0.00490195	0.0104879
Streptococcus pyogenes	1314	0.658118	0.620534	0.359152	0.171041	0.615207	0.644951	0.693854	0.310716	0.166035	0.614969	0.779093	0.731809	0.298577	0.150425	0.478307	0.600003	0.771075	0.732432	0.296537	0.147795	0.472894	0.588455	0.279215	0.745795	0.717181	0.465855	0.131464	0.578343	0.747058	0.701552	0.312939	0.15265	0.461832	0.571613	0.735989	0.69239	0.310966	0.15221	0.457436	0.555118	0.710322	0.292985	0.669501	0.140797	0.446722	0.533772	0.677236	0.290369
Lysobacter silvestris	1645665	0.0653314	0.0629855	0.0366517	0.00370734	0.0596218	0.0702917	0.058977	0.0321389	0.00428704
Achromobacter xylosoxidans	85698	0.0297153	0.0200851	0.0274221	0.0137513
Oidiodendron maius	78148	0.0356616	0.071408	0.0139899	0.00369285
Human immunodeficiency virus 1	11676	0.0535524	0.0601398	0.0457965	0.0171047	0.0675202	0.0443764	0.0594635	0.0365538	0.0197313
Thioflexothrix psekupsii	1570016	0.15121	0.126192	0.0939918	0.0375746	0.118384	0.14567	0.17192	0.074724	0.0315324	0.119541	0.193813	0.142888	0.063273	0.0300574	0.130935	0.116143	0.192599	0.14288	0.0630348	0.0311499	0.130119	0.115068	0.061283	0.191915	0.141278	0.129056	0.0202902
Erysipelotrichaceae bacterium OH741_COT-311	2491058	0.0773907	0.084192	0.0903117	0.0520178	0.0717524	0.0954894	0.0886142	0.0860417	0.0439226	0.0734893	0.093288	0.103695	0.0784519	0.0409702	0.0841601
Aspergillus heteromorphus	51019	0.0687664	0.0568095	0.0366521	0.017472	0.0709117	0.0409271	0.0746227	0.0409971	0.0122337
Moraxella ovis	29433	0.0218238	0.0174267	0.0341058	0.0143009
Acinetobacter johnsonii	40214	112.411	162.544	34.2652	3.45562	169.499	126.757	109.519	25.8094	3.00011	162.915	132.355	182.214	22.4501	2.34766	57.7724	153.82	129.668	182.538	21.9052	2.25171	56.1327	147.456	18.193	119.976	175.258	54.0166	1.69147	141.8	122.928	167.99	26.5155	2.38006	51.6509	138.22	119.514	163.64	25.9865	2.35001	50.3905	129.353	111.566	20.7798	152.901	1.94936	47.3535	118.181	101.516	20.1381
Chlamydia psittaci	83554	2.37944	2.01862	0.856217	0.29514	2.02991	2.19122	2.5847	0.666198	0.285132	2.00019	3.03646	2.76705	0.606168	0.25863	1.53151	1.88135	2.98368	2.77208	0.598598	0.258875	1.50031	1.8238	0.542504	2.87173	2.68049	1.4594	0.235207	1.76877	2.86547	2.58716	0.668412	0.260063	1.40509	1.73604	2.79796	2.53175	0.661435	0.25908	1.38095	1.65203	2.64282	0.583084	2.39588	0.248222	1.32251	1.54668	2.44481	0.575813
Moraxella lacunata	477	0.0233745	0.0615842	0.100653	0.0365541	0.0649858	0.0301598	0.0355803	0.103744	0.0315126
Neisseria gonorrhoeae	485	0.424831	0.353583	0.226638	0.0822442	0.34597	0.406084	0.443783	0.194712	0.0728832	0.347825	0.491014	0.439466	0.182132	0.0529461	0.338986	0.333367	0.487154	0.439713	0.181282	0.0551366	0.335897	0.328782	0.16577	0.476073	0.433229	0.331869	0.042346	0.324893	0.475511	0.426601	0.194716	0.0588215	0.329751	0.322203	0.47017	0.422514	0.193819	0.0586423	0.327221	0.315704	0.457777	0.175081	0.411948	0.0530048	0.320977
Plasmodium knowlesi	5850	0.428936	0.378497	0.288861	0.177069	0.366	0.427587	0.444343	0.263729	0.170869	0.366246	0.484362	0.454335	0.244191	0.174429	0.366705	0.363408	0.480613	0.454612	0.242737	0.171864	0.363313	0.358494	0.233653	0.467336	0.447312	0.358855	0.1646	0.354002	0.478281	0.439868	0.262267	0.164233	0.34326	0.351068	0.472927	0.435479	0.260838	0.163809	0.340642	0.34374	0.460335	0.240014	0.424815	0.167937	0.334257	0.334204	0.44402	0.245471
Methanosarcina lacustris	170861	0.0749379	0.0794117	0.0273029	0.0206514	0.0769818	0.0785004	0.0800428	0.0137525	0.0237872
Candidatus Vecturithrix granuli	1499967	0.0238486	0.0459545	0.0317179	0.02044
Propionibacterium virus PHL041M10	1982276	0.0513918	0.0237844	0.000495456	0.00368988
Frankia canadensis	1836972	0.584328	0.511575	0.272994	0.149341	0.497569	0.562025	0.605005	0.227015	0.153421	0.496309	0.685034	0.645716	0.212394	0.148998	0.402903	0.480377	0.678457	0.646182	0.211255	0.148586	0.398884	0.472112	0.202195	0.655246	0.633759	0.393623	0.141436	0.464872	0.660091	0.621221	0.227062	0.143504	0.390813	0.460067	0.650989	0.61353	0.225897	0.143131	0.387525	0.448244	0.629892	0.210113	0.594271	0.144063	0.379467	0.432824	0.60241	0.207752
Cryptococcus neoformans	5207	0.157192	0.166023	0.0508453	0.0483126	0.151432	0.154929	0.183088	0.0367153	0.0515384	0.155606	0.194164	0.163346	0.0373732	0.0507882	0.116906	0.154891	0.192955	0.163405	0.036836	0.0475754	0.116236	0.153443	0.0461427	0.190598	0.161645	0.115302	0.0276114
Melampsora larici-populina	203908	0.0418602	0.0204356	0.0279188	0.0138564
Ophiocordyceps polyrhachis-furcata	1330020	0.065538	0.0768784	0.0318486	0.0238133	0.0671234	0.0855778	0.0644486	0.0273719	0.019636
Lentibacillus lipolyticus	2510307	0.881191	0.798664	0.476597	0.199654	0.786312	0.861449	0.922633	0.427358	0.185144	0.774392	1.04566	1.06083	0.411834	0.161091	0.614508	0.743122	1.03282	1.06194	0.408252	0.159981	0.60633	0.726826	0.366647	0.990698	1.03537	0.595599	0.145157	0.712488	0.99635	1.00932	0.430202	0.168957	0.588226	0.7032	0.979332	0.992907	0.426793	0.16841	0.581641	0.680209	0.939918	0.392892	0.952641	0.154601	0.565642	0.650556	0.889374	0.384794
Malassezia restricta	76775	0.125727	0.0966475	0.0475323	0.0206004	0.0845654	0.129531	0.116619	0.042475	0.0197926	0.0912345	0.124373	0.153088	0.0383931	0.020374	0.0533878
Piromyces finnis	1754191	0.197234	0.149953	0.122651	0.066865	0.153253	0.181201	0.197602	0.106133	0.0651978	0.15023	0.220403	0.178952	0.104705	0.0524215	0.177847	0.150023	0.219066	0.179022	0.104186	0.0489615	0.176765	0.148545	0.0930136	0.21719	0.177011	0.175285	0.0491851	0.147141	0.214246	0.175146	0.106875	0.0532118	0.176717
Kangiella spongicola	796379	0.284359	0.242433	0.142627	0.0620062	0.240872	0.267846	0.290386	0.128976	0.0507119	0.244838	0.314595	0.259276	0.1148	0.0553875	0.222917	0.243749	0.31259	0.259383	0.114237	0.0512	0.221289	0.24112	0.101352	0.309451	0.256103	0.219207	0.0518562	0.238588	0.305652	0.252976	0.123019	0.0504474	0.220838	0.237014	0.30312	0.250937	0.122487	0.0504078	0.219482
Acytostelium subglobosum	361139	0.0573076	0.0752712	0.0583856	0.020885	0.0799161	0.0615916	0.0701781	0.0405566	0.0201082
Pithovirus LCPAC101	2506586	0.0385927	0.0143873	0.0228267	0.00369456
Bat gammaretrovirus	1157040	0.0329183	0.0628967	0.0271829	0.00708657
Dictyostelium discoideum	44689	0.0475218	0.0513845	0.0226715	0.0206097
Trypanosoma brucei	5691	0.302986	0.310345	0.215408	0.108313	0.304041	0.312753	0.304111	0.195721	0.106339	0.301059	0.324525	0.343671	0.186401	0.100692	0.251917	0.297358	0.322287	0.343844	0.185491	0.0981432	0.250093	0.293857	0.17305	0.318175	0.339331	0.247724	0.0900165	0.290663	0.314842	0.334765	0.19588	0.0990042	0.247953	0.288573	0.312056	0.332008	0.194928	0.0988293	0.246438	0.283342	0.305311	0.18479	0.325276	0.0920647	0.242707	0.276477	0.296783	0.183046
Periconia macrospinosa	97972	0.0813598	0.102971	0.0410591	0.0383573	0.102704	0.10014	0.0707519	0.0372582	0.0356343	0.100514	0.0735714	0.11034	0.0297452	0.0357155	0.094525
Propionibacterium virus Lauchelly	1982257	0.0491802	0.0266079	0.00049671	0.00034333
Mannheimia haemolytica	75985	0.0368736	0.0207525	0.0229233	0.010953
Pseudomonas sp. 2822-15	1712677	0.432282	0.428924	0.262239	0.142849	0.420961	0.446444	0.43355	0.242153	0.13322	0.420081	0.472561	0.48682	0.23337	0.120258	0.349578	0.408493	0.468798	0.487132	0.232081	0.119079	0.346448	0.402402	0.214558	0.460246	0.479291	0.342371	0.112255	0.397092	0.457293	0.471303	0.242018	0.124138	0.339697	0.393543	0.452184	0.466452	0.240756	0.123845	0.337137	0.384781	0.440381	0.228061	0.454297	0.114187	0.330792	0.373283	0.424945	0.226791
Proteobacteria bacterium	1977087	0.0566629	0.0578604	0.0138177	0.0206966	0.0610084	0.056785	0.0451691	0.0182454	0.0198993
Ligilactobacillus salivarius	1624	0.03557	0.0232204	0.0326092	0.0207914
Trypanosoma theileri	67003	0.0209979	0.0455768	0.0318567	0.0275063
Acidibacillus ferrooxidans	1765683	0.221037	0.199631	0.125336	0.0752402	0.195365	0.208754	0.228691	0.124606	0.0656213	0.19548	0.232665	0.226204	0.126334	0.0570511	0.172534	0.193326	0.231165	0.226277	0.125723	0.0540486	0.171375	0.191422	0.1238	0.229519	0.223646	0.169825	0.0343346	0.189598	0.227339	0.22118	0.124859	0.0632125	0.170065	0.188455	0.225635	0.21956	0.124374	0.063058	0.169091
Thalassospira xiamenensis	220697	17.4743	27.1081	5.51703	0.863513	28.2944	20.2722	16.844	4.18549	0.79741	27.2238	20.2725	29.3741	3.73112	0.692171	8.57126	25.7991	19.8702	29.426	3.65008	0.671852	8.34058	24.7513	3.12872	18.4178	28.2666	8.04153	0.560247	23.814	18.9268	27.1128	4.29192	0.699165	7.67188	23.2245	18.412	26.4207	4.21538	0.693535	7.49509	21.7605	17.2165	3.51021	24.7137	0.610858	7.06877	19.9173	15.7032	3.41297
Perkinsus marinus	31276	0.0416424	0.0285467	0.00935928	0.0171045
Pseudomonas sp. 2588-5	1712676	0.402829	0.357893	0.227884	0.138536	0.346883	0.3922	0.427082	0.206925	0.130284	0.344115	0.461241	0.437556	0.200526	0.119276	0.315428	0.339459	0.457766	0.437805	0.199521	0.116922	0.312819	0.33505	0.193008	0.447228	0.431116	0.309396	0.102573	0.330996	0.44895	0.424287	0.20577	0.121412	0.306116	0.328357	0.444104	0.420248	0.204803	0.121118	0.303988	0.321781	0.43286	0.198361	0.410249	0.111656	0.298737	0.313169	0.418129	0.19605
Streptomyces sp. Mg1	465541	0.0476557	0.0457005	0.0278551	0.0245782
African swine fever virus	10497	0.0690561	0.0661209	0.0554555	0.0173045	0.0683156	0.0817	0.0496703	0.05588	0.0120153
Human endogenous retrovirus W	87786	0.494495	0.461	0.242508	0.107574	0.459324	0.473972	0.521871	0.198088	0.106445	0.457393	0.572002	0.559863	0.191768	0.0801584	0.366606	0.434915	0.567101	0.560291	0.190773	0.083676	0.363192	0.427842	0.176103	0.548874	0.550488	0.358746	0.0757412	0.421783	0.554067	0.540707	0.197983	0.0907128	0.355065	0.417704	0.547202	0.53456	0.197022	0.0905225	0.352287	0.407759	0.531314	0.190728	0.518819	0.0760163	0.345458	0.394584	0.510537	0.188193
Moraxella atlantae	34059	0.0246681	0.0172498	0.029216	0.014183
Aspergillus ochraceoroseus	138278	0.115056	0.130747	0.0690308	0.0345475	0.123321	0.132467	0.109177	0.0551528	0.0397676	0.120614	0.128935	0.142342	0.054267	0.0205596	0.118023	0.117227	0.128203	0.14234	0.0540275	0.021201	0.117294
Bacillus sp. VT-16-64	1917019	0.623262	0.608872	0.387314	0.176428	0.597133	0.640247	0.62957	0.344741	0.16834	0.591094	0.703097	0.743691	0.318578	0.15733	0.473767	0.573855	0.696303	0.744311	0.316312	0.155908	0.46845	0.56309	0.291129	0.676578	0.728735	0.461528	0.145184	0.553661	0.678622	0.71298	0.343974	0.156886	0.45304	0.547424	0.669123	0.703461	0.341692	0.156452	0.448791	0.532085	0.647032	0.309177	0.679734	0.150817	0.43844	0.51216	0.618517	0.307985
Propionibacterium phage pa29399-1-D_2	2079403	0.0610784	0.0450683	0.000495146	0.000343329
archaeon	1906665	0.39805	0.39984	0.320592	0.16967	0.391462	0.39121	0.431008	0.288708	0.16667	0.390948	0.466313	0.422378	0.265518	0.169876	0.333219	0.380898	0.462743	0.422643	0.263865	0.170943	0.330351	0.375472	0.245535	0.453023	0.416087	0.326599	0.172575	0.370677	0.450431	0.409476	0.289901	0.162247	0.326215	0.367484	0.445554	0.405497	0.28824	0.162158	0.323833	0.359609	0.434227	0.265592	0.395551	0.162061	0.317947	0.349252	0.419431	0.263702
Magnaporthiopsis poae	148304	0.0416237	0.0287743	0.0362551	0.010477
Phycomyces blakesleeanus	4837	0.213387	0.221599	0.156046	0.0691986	0.22786	0.200536	0.234046	0.132443	0.0678608	0.226042	0.24374	0.223628	0.123928	0.0597219	0.175883	0.218582	0.242255	0.223703	0.123336	0.0622746	0.174731	0.216248	0.113393	0.239453	0.221205	0.173224	0.058991	0.214197	0.238523	0.218741	0.132709	0.0605612	0.173252	0.212775	0.236752	0.217208	0.13213	0.060462	0.172286
Pythium insidiosum	114742	0.0298829	0.0284687	0.0184219	0.0137522
Galdieria sulphuraria	130081	0.0359498	0.0400111	0.0139552	0.013791
Streptomyces sp. Alain-F2R5	2026341	0.0357632	0.036968	0.0370165	0.0137916
Gonium pectorale	33097	0.0269417	0.0345095	0.0228271	0.00704315
Syncephalastrum racemosum	13706	0.0267811	0.0313859	0.0546791	0.00705514
Nesterenkonia natronophila	2174932	0.0924967	0.0748725	0.0697294	0.020764	0.0828659	0.0893417	0.0806264	0.0600943	0.0199943	0.0851237	0.0776619	0.0959133	0.0543711	0.0155138	0.0845815
Colwellia sp. RSH04	2305464	0.356504	0.333224	0.235822	0.141278	0.322489	0.362302	0.357622	0.224583	0.131881	0.317647	0.379902	0.40682	0.219132	0.12033	0.290288	0.317834	0.377322	0.407053	0.217924	0.116128	0.288039	0.313953	0.209684	0.371144	0.401034	0.285088	0.0996097	0.310304	0.370151	0.394913	0.227035	0.120873	0.282469	0.307973	0.366662	0.391308	0.225862	0.120593	0.280632	0.302063	0.358535	0.218139	0.382699	0.108944	0.276058	0.294402	0.347901	0.215434
Legionella pneumophila	446	1.56648	1.5055	0.720682	0.272286	1.47896	1.57542	1.63803	0.594172	0.262497	1.45787	1.94468	1.94189	0.553477	0.243692	0.982941	1.40404	1.91295	1.94441	0.547362	0.24069	0.96604	1.36292	0.493731	1.82739	1.8842	0.943998	0.223848	1.32711	1.83826	1.82533	0.60055	0.244351	0.922131	1.30401	1.79926	1.78869	0.594607	0.243428	0.908846	1.24696	1.70856	0.537158	1.69967	0.229405	0.876655	1.17443	1.59358	0.530511
Lawsonella clevelandensis	1528099	0.0724055	0.0789643	0.018643	0.00712073	0.0823109	0.0854978	0.0495647	0.0139979	0.00821635
Pseudocohnilembus persalinus	266149	0.16103	0.120732	0.101491	0.0609826	0.121613	0.16913	0.143022	0.0995387	0.0482743	0.122679	0.162031	0.148127	0.0995067	0.0305159	0.190878	0.119295	0.161008	0.148126	0.0990008	0.0317441	0.189593	0.118282	0.0965613	0.160844	0.146381	0.187935	0.0137998
Aphanothece hegewaldii	1521625	0.22596	0.211351	0.140838	0.0593724	0.203326	0.228379	0.235712	0.119643	0.0560777	0.204979	0.261865	0.224551	0.112545	0.0457685	0.203957	0.198327	0.260232	0.224629	0.112002	0.0475793	0.202574	0.196239	0.103841	0.257117	0.222056	0.200819	0.0404057	0.194405	0.256541	0.219496	0.114593	0.0523959	0.199141	0.193132	0.254571	0.217898	0.114114	0.0523333	0.198008
Chthoniobacter flavus	191863	0.196728	0.207973	0.124434	0.074533	0.215251	0.190749	0.208557	0.118502	0.0614794	0.213506	0.214203	0.216841	0.120752	0.0358497	0.180958	0.206911	0.212907	0.216913	0.120182	0.0372952	0.179776	0.204819	0.111279	0.209715	0.214497	0.178163	0.0274751	0.203012	0.20895	0.212097	0.124726	0.0427181	0.177876	0.201745	0.207486	0.210596	0.124257	0.0423771	0.176852
Lactobacillus sp. UMNPBX17	2042030	0.20019	0.179525	0.163897	0.0562091	0.177668	0.197294	0.21074	0.145998	0.0482539	0.179638	0.231061	0.200032	0.144859	0.0305706	0.166661	0.174092	0.22957	0.200069	0.144187	0.0318034	0.165578	0.172382	0.126494	0.227212	0.197762	0.16413	0.0274697	0.170824	0.231889	0.195592	0.145002	0.0429982	0.153975
Anaerococcus octavius	54007	0.12099	0.0954163	0.0186695	0.0173877	0.0982754	0.157749	0.0601534	0.0185707	0.0160234
Bacillus toyonensis	155322	1.02636	0.940813	0.523426	0.22892	0.92288	1.01865	1.08865	0.451088	0.216985	0.924103	1.25195	1.19193	0.415347	0.205401	0.707583	0.887783	1.23524	1.19322	0.411662	0.204626	0.697293	0.866395	0.381136	1.18693	1.16184	0.683914	0.189426	0.847622	1.19411	1.13092	0.452578	0.204346	0.669193	0.835483	1.17258	1.1117	0.448945	0.2038	0.660997	0.805426	1.12143	0.40352	1.06451	0.197149	0.641287	0.76692	1.05626	0.39916
Oleiphilus sp. HI0130	1822269	1.04798	1.41483	0.548448	0.223077	1.47608	1.11441	1.05184	0.47841	0.212776	1.42488	1.1949	1.42954	0.454063	0.191162	0.710911	1.37584	1.17883	1.43104	0.449872	0.187016	0.700619	1.3361	0.42078	1.12295	1.391	0.687098	0.163422	1.30099	1.13556	1.35097	0.483145	0.193992	0.675801	1.27848	1.11479	1.32683	0.478975	0.193298	0.667604	1.22296	1.06728	0.444217	1.26678	0.176329	0.647624	1.15231	1.00654	0.440731
Streptomyces sp. S5	1456735	0.0880323	0.0939403	0.045403	0.0375951	0.10786	0.0578276	0.123017	0.0316532	0.0354457	0.109158	0.123827	0.0644449	0.0328724	0.0302267	0.0633727
Exophiala xenobiotica	348802	0.0238872	0.0256377	0.0138782	0.0207541
Choiromyces venosus	44640	0.194386	0.235968	0.114743	0.0643749	0.231102	0.195133	0.22203	0.0950703	0.065762	0.228415	0.238011	0.203713	0.103481	0.0522648	0.161753	0.225156	0.236582	0.203775	0.102976	0.0490629	0.160738	0.22285	0.0888845	0.232168	0.201432	0.159355	0.056241	0.220713	0.232673	0.199247	0.100331	0.0583612	0.160206	0.219328	0.230903	0.197775	0.0999657	0.0581841	0.159322
Chlamydia trachomatis	813	668.406	483.349	430.484	59.0324	467.687	606.025	743.701	386.662	48.2051	454.41	905.434	803.362	355.861	38.937	393.475	431.937	886.941	804.802	347.014	39.5108	382.24	414.055	300.252	826.228	772.629	367.645	27.615	398.126	839.094	740.473	408.195	42.8706	352.979	388.059	815.695	721.324	399.941	42.1794	344.288	363.101	761.272	330.589	673.875	33.4385	323.367	331.681	692.396	312.715
Shigella flexneri	623	0.0418618	0.00637138	0.0322048	0.0242733
Streptococcus mitis	28037	0.36907	0.36749	0.240572	0.0998674	0.363506	0.357676	0.403741	0.203499	0.0976402	0.360939	0.43422	0.391129	0.196633	0.0841607	0.29767	0.350853	0.431136	0.391336	0.19562	0.0822415	0.295206	0.346263	0.187697	0.41875	0.385658	0.291987	0.0625133	0.341953	0.423421	0.380014	0.203408	0.0887246	0.288856	0.339161	0.419074	0.376687	0.202462	0.0885466	0.286841	0.332315	0.408741	0.194435	0.368113	0.0755359	0.281988	0.323246	0.39542	0.192772
Lacticaseibacillus casei	1582	0.139836	0.143033	0.0781118	0.0346015	0.132319	0.145889	0.15511	0.0639914	0.0317592	0.12561	0.161836	0.167439	0.05784	0.0256985	0.129038	0.122052	0.160901	0.167461	0.0575672	0.0267536	0.128268	0.120949	0.0533303	0.154411	0.165638	0.12718	0.0276712
Candidatus Thorarchaeota archaeon	2053491	0.029885	0.0489401	0.0228283	0.00706674
Microbotryum silenes-dioicae	796604	0.185154	0.240262	0.140638	0.0775542	0.254164	0.18888	0.185963	0.13012	0.0768675	0.243309	0.201935	0.207872	0.122503	0.0700034	0.175423	0.240261	0.200901	0.207934	0.121852	0.0670437	0.174297	0.237717	0.126572	0.19242	0.205558	0.172733	0.0490921	0.235324	0.196693	0.203357	0.137534	0.0596218	0.172835	0.233792	0.195322	0.201871	0.136895	0.0595256	0.171872
Alteribacter natronophilus	2583810	0.541762	0.502738	0.368071	0.192496	0.493571	0.535382	0.567874	0.321589	0.192142	0.491356	0.618259	0.608434	0.311119	0.184058	0.409842	0.482254	0.612689	0.608888	0.308913	0.182505	0.405707	0.47426	0.295039	0.597194	0.597468	0.400285	0.168452	0.467171	0.597151	0.585769	0.324223	0.185856	0.395639	0.462466	0.589407	0.578887	0.322119	0.185307	0.392283	0.450869	0.571339	0.309647	0.561789	0.173314	0.38409	0.435805	0.548013	0.305287
Plasmodium cynomolgi	5827	0.436028	0.465919	0.294303	0.129323	0.458973	0.474823	0.420257	0.266559	0.121935	0.450924	0.446048	0.558827	0.255221	0.103758	0.36379	0.443526	0.442664	0.559194	0.253569	0.100463	0.360438	0.43657	0.232023	0.432425	0.549254	0.356045	0.0889533	0.430376	0.434684	0.539044	0.26761	0.107205	0.348235	0.426274	0.430026	0.533014	0.26602	0.106958	0.345561	0.416134	0.419074	0.240416	0.518091	0.101395	0.338995	0.402947	0.4049	0.237339
Avian leukosis virus	11864	0.0240272	0.0397937	0.00935902	0.00369036
Acinetobacter baumannii	470	55.9856	78.4353	17.8253	2.00047	81.3324	62.5946	55.0985	13.4804	1.76594	78.0368	66.872	90.98	11.6067	1.44773	28.1277	73.6823	65.5178	91.1444	11.3304	1.40181	27.3392	70.6551	9.47838	60.8349	87.5171	26.3164	1.0948	67.9477	62.211	83.8974	13.8634	1.44282	25.157	66.2382	60.4834	81.7331	13.5913	1.42659	24.5493	62.0037	56.4823	10.7096	76.3885	1.24842	23.0865	56.6744	51.4146	10.357
Propionibacterium virus PHL095N00	1982283	0.0436669	0.0332173	0.000494417	0.000343817
Propionibacterium virus PAS50	1982272	0.051481	0.0294613	0.000495586	0.000344452
Plasmodium sp. gorilla clade G1	880534	0.0180612	0.0372558	0.0231939	0.020458
Vibrio owensii	696485	10.0483	15.1121	3.36193	0.6587	15.7641	11.8465	9.25446	2.6966	0.610425	15.0941	11.0666	18.0518	2.40479	0.552124	4.4824	14.3385	10.853	18.0828	2.35672	0.538097	4.36804	13.7655	2.05299	10.0139	17.38	4.21956	0.463566	13.2533	10.3702	16.6761	2.78416	0.549347	4.03254	12.9302	10.0945	16.2569	2.73696	0.545673	3.94562	12.1292	9.45222	2.27245	15.2172	0.496249	3.73421	11.1206	8.64117	2.20637
Candidatus Hodgkinia cicadicola	573658	0.0820045	0.0739281	0.0467778	0.0242656	0.0857197	0.0580844	0.0865579	0.0415313	0.0280828
Halomonas gudaonensis	376427	0.0969228	0.0920257	0.0504075	0.0173239	0.097433	0.0917423	0.0893675	0.0460545	0.0159563	0.0989144	0.0999576	0.0867457	0.0459541	0.0153903	0.0639932
Tremella mesenterica	5217	0.528415	0.633952	0.357477	0.161237	0.651281	0.559298	0.52029	0.326485	0.152148	0.637598	0.574467	0.662035	0.310153	0.137452	0.390656	0.620259	0.56951	0.662558	0.307993	0.134838	0.386874	0.608035	0.287481	0.554303	0.649531	0.381833	0.117531	0.597331	0.556461	0.636228	0.328841	0.139761	0.376705	0.59026	0.549608	0.628326	0.32674	0.139402	0.373631	0.572876	0.533361	0.303094	0.608692	0.127817	0.366169	0.550376	0.512693	0.298862
Oceanospirillum multiglobuliferum	64969	0.318608	0.290111	0.238808	0.120523	0.279683	0.324086	0.323285	0.217218	0.11283	0.27857	0.350211	0.340575	0.206171	0.102107	0.289009	0.275	0.347887	0.340754	0.205094	0.0997951	0.286782	0.271837	0.180666	0.342536	0.336192	0.283853	0.107124	0.268895	0.344565	0.331631	0.220196	0.0996943	0.276033	0.266997	0.341435	0.328863	0.219122	0.099474	0.274272	0.262234	0.334071	0.197844	0.322071	0.100111	0.269901	0.255974	0.324509	0.201621
Pseudomicrostroma glucosiphilum	1684307	0.0267878	0.0259114	0.0407319	0.0036898
Plasmodium vivax	5855	1.94943	1.89748	0.839416	0.288692	1.83797	1.99391	2.01815	0.67495	0.28009	1.81241	2.37225	2.53054	0.613414	0.259247	1.24954	1.75814	2.33205	2.53449	0.606116	0.253821	1.22581	1.7027	0.549301	2.22257	2.45063	1.19474	0.231564	1.65469	2.23542	2.36956	0.677041	0.255734	1.16088	1.62372	2.18581	2.31828	0.669901	0.254757	1.14232	1.54722	2.07001	0.592907	2.19578	0.241835	1.09744	1.45033	1.92358	0.584736
Bacteroides fragilis	817	0.0508913	0.0371205	0.0689487	0.0349722	0.034154	0.0533327	0.0496929	0.0693705	0.0320777
Streptococcus pneumoniae	1313	243.785	310.161	93.6276	11.9126	317.472	267.396	244.692	76.8621	9.91624	307.156	298.39	362.319	67.6391	8.25762	137.199	290.641	292.31	362.949	65.9742	8.07312	133.296	278.629	55.9155	271.278	348.461	128.241	6.01665	267.894	277.09	333.972	79.6882	8.37506	122.299	261.126	269.373	325.331	78.0746	8.2471	119.296	244.346	251.429	62.3666	303.958	7.01757	112.066	223.21	228.722	59.789
Aster yellows phytoplasma	35779	0.342174	0.337777	0.210131	0.0992913	0.330391	0.328856	0.380725	0.166107	0.106397	0.329519	0.413434	0.373529	0.169537	0.090472	0.246455	0.324779	0.41051	0.373733	0.168683	0.087524	0.244637	0.320775	0.160531	0.402326	0.368407	0.242219	0.0745543	0.31716	0.403949	0.363034	0.166475	0.0975003	0.241143	0.314777	0.399936	0.359792	0.165747	0.0972866	0.239621	0.308838	0.390445	0.168677	0.35186	0.0809203	0.235959	0.301046	0.378173	0.16583
Leuconostoc mesenteroides	1245	0.413947	0.386103	0.222962	0.128588	0.388412	0.395958	0.435097	0.205876	0.115178	0.386539	0.476032	0.429192	0.198131	0.112098	0.294898	0.379439	0.472366	0.429451	0.197151	0.109696	0.292341	0.374084	0.18692	0.460891	0.422837	0.28905	0.100264	0.369288	0.462004	0.416129	0.206139	0.113277	0.288268	0.366119	0.456923	0.412126	0.205162	0.113018	0.286175	0.358265	0.445064	0.196221	0.402236	0.103695	0.281057	0.347987	0.429629	0.194158
Streptococcus sp. GMD6S	1169675	0.423518	0.390077	0.225256	0.088685	0.387783	0.402361	0.458995	0.192402	0.080087	0.387053	0.508178	0.436575	0.17112	0.0847533	0.291588	0.377975	0.504116	0.436847	0.170289	0.0822134	0.289093	0.372546	0.156988	0.490656	0.429953	0.285877	0.0763514	0.367725	0.494794	0.422967	0.187138	0.0783972	0.283907	0.364525	0.489086	0.41877	0.186277	0.0782478	0.281881	0.356618	0.47585	0.171172	0.408329	0.0751095	0.276912
Porphyromonas sp. oral taxon 278	712437	0.372653	0.449837	0.274607	0.139967	0.455795	0.39752	0.375555	0.256287	0.130749	0.451423	0.406776	0.472836	0.246181	0.118679	0.262353	0.447248	0.403921	0.473129	0.244739	0.114896	0.260314	0.440259	0.227238	0.395747	0.465444	0.257613	0.10618	0.434001	0.395187	0.457573	0.257948	0.119671	0.257953	0.429855	0.39132	0.452975	0.256561	0.119373	0.256239	0.419589	0.38215	0.233083	0.4418	0.117263	0.252082	0.406297	0.37032	0.230692
Trypanosoma congolense	5692	0.309686	0.309925	0.236791	0.124759	0.304111	0.311526	0.327816	0.200208	0.130104	0.302768	0.348521	0.321997	0.189294	0.132266	0.278716	0.296292	0.34624	0.32216	0.18831	0.132381	0.27653	0.292769	0.178516	0.340373	0.317773	0.273682	0.130162	0.289622	0.34109	0.313408	0.201754	0.128402	0.269164	0.287527	0.338032	0.31073	0.200773	0.128109	0.26741	0.282341	0.33077	0.181315	0.30412	0.135655	0.26308	0.275482	0.321391	0.17851
Cryobacterium sp. Sr39	1259198	0.0264228	0.0370901	0.00935903	0.00706674
Ascochyta rabiei	5454	0.0417413	0.0595733	0.0228709	0.0037774
Aureococcus anophagefferens	44056	0.039166	0.0517516	0.00934364	0.0171862
Moraxella lincolnii	90241	0.0190403	0.0322822	0.0601543	0.0269944
Phaffia rhodozyma	5421	0.0325158	0.0399006	0.0316412	0.0140377
Malassezia globosa	76773	29.0369	42.4513	7.70217	1.04504	43.8093	33.5098	28.3292	5.5299	0.953983	42.4256	34.5691	45.1681	4.7626	0.819778	16.0692	40.4881	33.8722	45.2439	4.65508	0.7826	15.6259	38.8319	3.94962	31.2843	43.4569	15.0492	0.64721	37.3574	32.0748	41.6678	5.6408	0.798454	14.4277	36.4203	31.1939	40.6021	5.53892	0.791555	14.0846	34.107	29.146	4.49693	37.9596	0.701632	13.2577	31.1923	26.5541	4.3568
Thalassiosira oceanica	159749	0.198008	0.175887	0.103282	0.0667704	0.178733	0.191235	0.19047	0.0841351	0.0727831	0.175181	0.206108	0.210578	0.0805343	0.0776181	0.136173	0.169788	0.205095	0.210639	0.0801604	0.0807289	0.135311	0.168139	0.0806715	0.196473	0.208261	0.134141	0.0822594	0.166598	0.199977	0.205949	0.0844681	0.0771701	0.137778
Propionibacterium phage pa63	2079410	0.0728668	0.0616326	0.000493215	0.00706672
Acinetobacter sp. KU 013TH	2083753	0.410289	0.416574	0.303145	0.15331	0.418008	0.414794	0.423573	0.276953	0.144872	0.412583	0.453222	0.491305	0.268193	0.123346	0.33315	0.394048	0.449833	0.491615	0.266527	0.129287	0.33028	0.388141	0.242968	0.436687	0.483665	0.326511	0.125983	0.383122	0.440935	0.475574	0.279248	0.134551	0.322085	0.379714	0.436158	0.470553	0.277689	0.134233	0.319758	0.371403	0.425027	0.259266	0.457641	0.125358	0.314029	0.360347	0.410496	0.254957
Mason-Pfizer monkey virus	11855	0.026781	0.0485436	0.00927878	0.000496121
Anaerolineae bacterium	2052143	0.118954	0.0875263	0.0643341	0.024117	0.0953056	0.0922201	0.11563	0.0687902	0.019925	0.0931279	0.123075	0.0929614	0.0580778	0.0154659	0.107915
Ectocarpus siliculosus	2880	0.0537018	0.0428591	0.0271816	0.013798
Hamiltosporidium tvaerminnensis	1176355	0.111433	0.188065	0.0981163	0.0586021	0.19339	0.14836	0.0798521	0.102973	0.0595954	0.189467	0.0781212	0.182058	0.0975362	0.0562924	0.095908	0.189307	0.0780609	0.182138	0.0970677	0.0526035	0.0952979	0.187466	0.0875865	0.0805684	0.18013	0.0945609	0.0539035
Bacillus thuringiensis	1428	5.50703	6.91511	2.53366	0.470066	7.10041	5.90757	5.66229	2.07288	0.425542	6.78686	6.89042	8.2342	1.81425	0.375772	3.04214	6.49638	6.76109	8.24803	1.77979	0.36594	2.96842	6.24551	1.53223	6.37448	7.93605	2.87278	0.308928	6.02383	6.45075	7.62422	2.12278	0.376025	2.76206	5.8835	6.28402	7.44135	2.08984	0.373839	2.7054	5.53669	5.89643	1.67458	6.98251	0.345593	2.56936	5.0975	5.40619	1.63231
Botryobasidium botryosum	264124	0.0330133	0.0341328	0.0138788	0.000342225
Flectobacillus sp. BAB-3569	1509483	0.0218955	0.0178517	0.0420326	0.0104544
Curtobacterium sp. PhB115	2485173	0.0329654	0.0372671	0.00490208	0.000344131
[Candida] boidinii	5477	0.0477427	0.0341314	0.0227287	0.0070432
Yersinia pestis	632	0.379436	0.363537	0.19301	0.11049	0.354567	0.399163	0.363558	0.176075	0.103941	0.350662	0.392589	0.465643	0.173923	0.0905935	0.284686	0.341754	0.389671	0.46594	0.173086	0.088868	0.282425	0.337305	0.161601	0.379903	0.458683	0.279441	0.0802025	0.333398	0.38104	0.4513	0.176731	0.0953947	0.277949	0.330781	0.377084	0.44679	0.175969	0.0951906	0.27609	0.32432	0.367808	0.167454	0.435432	0.0889733	0.271486	0.315787	0.355801	0.165256
Propionibacterium virus P1.1	1982264	0.0638737	0.0514507	0.000494642	0.00370226
Streptococcus sp. KR	1979528	0.0180589	0.0372166	0.0275134	0.00377739
uncultured bacterium	77133	0.29924	0.263131	0.144403	0.0706773	0.277013	0.278262	0.288409	0.12322	0.0681519	0.274208	0.329847	0.293157	0.11422	0.04775	0.256475	0.264447	0.327685	0.293292	0.113633	0.0497941	0.254613	0.261346	0.108541	0.322636	0.289745	0.252142	0.0357581	0.258698	0.331258	0.286129	0.122644	0.0491599	0.235065	0.256849	0.328298	0.283947	0.122098	0.0491225	0.233646	0.252391	0.321427	0.111518	0.278302	0.0472345	0.230093
Propionibacterium phage MEAK	2041562	0.0654582	0.0558123	0.00049406	0.00369046
Sarcocystis neurona	42890	0.0728032	0.0568	0.0414373	0.0241582	0.0670419	0.0376771	0.0904799	0.0410601	0.0240736
Fragilariopsis cylindrus	186039	0.368312	0.418805	0.253352	0.139676	0.416869	0.402946	0.357994	0.233821	0.131652	0.40772	0.383761	0.455934	0.228941	0.115985	0.319276	0.406991	0.381144	0.456222	0.227645	0.111423	0.316607	0.40109	0.216077	0.372431	0.448968	0.313082	0.095637	0.39572	0.372616	0.441543	0.235196	0.117997	0.310394	0.392193	0.369077	0.437217	0.234008	0.117698	0.30821	0.383401	0.360618	0.222508	0.426841	0.10706	0.302847	0.372037	0.34974	0.220076
Acidomyces sp. 'richmondensis'	245562	0.0420603	0.0199743	0.027422	0.013752
Marinifilum sp. JC120	2302941	0.129567	0.104599	0.0976286	0.0240769	0.11016	0.109947	0.137311	0.0878944	0.0198609	0.111858	0.154568	0.0984032	0.0750614	0.0154023	0.120291	0.108711	0.15361	0.0983431	0.0747502	0.0160006	0.119585
Aspergillus campestris	41068	0.0358752	0.0258872	0.00482985	0.0104321
Entamoeba dispar	46681	0.0475215	0.0401766	0.045971	0.0280101	0.0337409	0.0409117	0.0647476	0.0366776	0.0322779
Rhodococcus sp. M8	1925550	0.589146	0.547102	0.309191	0.144747	0.546441	0.570745	0.615938	0.280999	0.132174	0.534599	0.675268	0.694429	0.268418	0.11561	0.40469	0.515232	0.668817	0.695013	0.266726	0.114287	0.400652	0.506167	0.241367	0.643324	0.681094	0.39531	0.107496	0.498268	0.653559	0.667216	0.281457	0.120094	0.38984	0.493052	0.644604	0.658532	0.27983	0.119786	0.386568	0.48018	0.623771	0.258183	0.636898	0.110252	0.378588	0.463363	0.596872	0.255685
Virgibacillus indicus	2024554	1.43928	1.22939	0.636594	0.24461	1.19225	1.36543	1.56821	0.546846	0.228688	1.17103	1.81978	1.69419	0.511084	0.206327	0.927434	1.12339	1.79072	1.69661	0.505849	0.204404	0.911985	1.09341	0.457082	1.69959	1.64573	0.891689	0.185843	1.0668	1.71349	1.59632	0.550193	0.210596	0.879159	1.04986	1.67784	1.56531	0.545018	0.209824	0.866812	1.00778	1.59493	0.490732	1.49036	0.196137	0.836814	0.954079	1.49002	0.481748
Vitrella brassicaformis	1169539	0.108262	0.0840659	0.0367343	0.0274165	0.0747844	0.11357	0.089578	0.0458045	0.0237132	0.0769048	0.0944016	0.11739	0.0414485	0.025392	0.0841636
Yarrowia lipolytica	4952	0.0330598	0.0343213	0.0229761	0.00704319
Mycobacterium shimoidei	29313	0.0539327	0.0343186	0.027422	0.017562
Cytobacillus kochii	859143	0.00946945	0.0314296	0.0408211	0.00704323
Pseudomonas sp. GW704-F2	2070577	0.115427	0.10291	0.0860057	0.0340953	0.0921769	0.100474	0.150848	0.0728849	0.0312866	0.0942621	0.150524	0.127458	0.065828	0.0252076	0.0751378	0.0918178	0.149622	0.127464	0.0655783	0.0262222	0.0746494
Xanthomonas campestris	339	0.100319	0.103438	0.0888669	0.0207777	0.108145	0.0889814	0.120292	0.0841549	0.00819055	0.110411	0.134495	0.0757637	0.0718375	0.00558625	0.0987651
Monkeypox virus	10244	0.463883	0.526087	0.280259	0.157475	0.525972	0.499331	0.4444	0.264912	0.148543	0.518745	0.472175	0.606369	0.254487	0.13549	0.357696	0.506184	0.468638	0.606814	0.252918	0.133384	0.354444	0.497451	0.240072	0.452338	0.595482	0.350167	0.120929	0.489774	0.459647	0.583917	0.2666	0.136827	0.344022	0.484681	0.454627	0.577015	0.265129	0.136511	0.341402	0.472134	0.442785	0.245645	0.559844	0.13057	0.335003	0.455812	0.427462	0.242707
Clostridioides difficile	1496	19.9137	24.5254	6.69608	0.904196	24.9236	21.7363	19.8429	5.0923	0.813171	24.0674	23.7976	30.2765	4.40252	0.693215	10.9315	22.7399	23.3236	30.3283	4.30373	0.677472	10.6355	21.8188	3.59208	21.6583	29.1351	10.2493	0.566772	20.9961	22.1368	27.9428	5.18446	0.69966	9.80244	20.4777	21.5316	27.233	5.09071	0.6938	9.57335	19.1913	20.1287	4.06816	25.4739	0.622154	9.02113	17.5709	18.3529	3.93931
Paludifilum halophilum	1642702	0.310826	0.289283	0.200933	0.0922454	0.276442	0.316257	0.325629	0.174556	0.0877009	0.276717	0.354342	0.342506	0.159375	0.0787354	0.26639	0.272308	0.352037	0.342677	0.158602	0.0761458	0.264473	0.269184	0.147541	0.345051	0.338312	0.261953	0.0690416	0.266323	0.345013	0.333878	0.168785	0.0775127	0.260712	0.264454	0.341831	0.331205	0.168038	0.0773659	0.259132	0.259786	0.334542	0.159352	0.324553	0.0692173	0.255155
Blastococcus sp. DSM 46838	1798228	0.032776	0.0314722	0.00935948	0.00706674
Chlamydia abortus	83555	2.00428	1.76599	0.820984	0.296876	1.74074	1.93718	2.15083	0.664138	0.283853	1.72412	2.56352	2.33803	0.609851	0.260165	1.33581	1.64345	2.51925	2.34201	0.602421	0.258646	1.30996	1.59396	0.541582	2.41459	2.26615	1.27587	0.238649	1.54868	2.41562	2.19138	0.667075	0.261598	1.23626	1.52081	2.36145	2.14518	0.660105	0.260595	1.21589	1.45039	2.23423	0.590842	2.03396	0.246107	1.16686	1.36157	2.07333	0.580381
Occallatibacter savannae	1002691	0.116288	0.202207	0.0888878	0.0528987	0.205382	0.152079	0.101642	0.103612	0.0363411	0.200763	0.102102	0.193652	0.102347	0.036752	0.0540619	0.200044	0.101264	0.193753	0.101874	0.0325231	0.0538975	0.197898	0.0961726	0.0972164	0.191601	0.0534753	0.0276062
Alistipes putredinis	28117	0.199252	0.177477	0.117631	0.0482201	0.182402	0.190032	0.199807	0.0969966	0.0471988	0.177562	0.209846	0.20957	0.100405	0.0405263	0.137018	0.172165	0.208488	0.209625	0.0999058	0.0421245	0.136174	0.170501	0.0892664	0.206998	0.207272	0.134972	0.0405089	0.168965	0.202925	0.204993	0.102097	0.0470189	0.139268
Lacticaseibacillus rhamnosus	47715	1.57755	1.99295	0.69642	0.271173	2.03953	1.73186	1.51308	0.589551	0.262103	1.98639	1.71981	2.25094	0.543939	0.24619	1.01985	1.89889	1.69262	2.25439	0.538399	0.242936	1.00205	1.83953	0.498792	1.59006	2.18185	0.978818	0.222362	1.78496	1.62821	2.11103	0.5988	0.24336	0.950802	1.75142	1.59428	2.06687	0.592999	0.242548	0.936951	1.66671	1.51684	0.526674	1.96041	0.232523	0.903299	1.56014	1.41837	0.51883
Human endogenous retrovirus H	57282	0.337364	0.330287	0.1674	0.0832227	0.326423	0.345142	0.346797	0.137679	0.0787296	0.326997	0.379763	0.377064	0.13188	0.0573759	0.288542	0.314197	0.377079	0.377272	0.131255	0.0596932	0.28632	0.310149	0.119092	0.36979	0.372129	0.283393	0.0561268	0.306681	0.369654	0.366889	0.137452	0.0628102	0.280911	0.304294	0.36608	0.363703	0.136834	0.0626963	0.279084	0.298513	0.357553	0.128632	0.355412	0.0575473	0.274601
Erwinia amylovora	552	0.141784	0.108209	0.0554622	0.0243694	0.119135	0.149922	0.0978634	0.0463243	0.0239816	0.120253	0.109669	0.155289	0.0418467	0.025762	0.0963489	0.116996	0.10916	0.155302	0.041414	0.0268254	0.0957338
Pluteus cervinus	181527	0.0356613	0.0313001	0.0138178	0.00368993
Propionibacterium virus Attacne	1982254	0.0535832	0.0534567	0.000495135	0.00369045
Brachyspira pilosicoli	52584	0.0415243	0.0577602	0.0234184	0.0104669
Motilimonas pumilua	2303987	9.25352	13.2751	2.85142	0.564776	13.625	10.7382	8.84659	2.15691	0.531353	13.226	10.5689	13.9662	1.89092	0.48197	5.62469	12.7029	10.3659	13.9878	1.85495	0.464196	5.47792	12.1951	1.62646	9.58903	13.4454	5.28763	0.400687	11.7443	9.82305	12.9118	2.18695	0.471573	5.06894	11.4589	9.56305	12.5875	2.15241	0.468808	4.95632	10.7527	8.95798	1.80465	11.7898	0.427737	4.68469	9.86331	8.19215	1.76467
Amorphotheca resinae	5101	0.0947501	0.118709	0.0271854	0.0309593	0.123875	0.109787	0.0800411	0.0183251	0.0315929	0.121151	0.095162	0.124064	0.0166005	0.0205936	0.0840999
Euryarchaeota archaeon TMED248	1986691	0.223666	0.266474	0.134734	0.0782864	0.274341	0.242906	0.20928	0.124693	0.0729807	0.265808	0.225452	0.271385	0.12269	0.0560835	0.20334	0.262443	0.224321	0.271502	0.122041	0.0526974	0.201993	0.259521	0.120216	0.21445	0.268235	0.200208	0.0405164	0.256848	0.226443	0.265008	0.12593	0.0569878	0.187814	0.255105	0.224793	0.262991	0.125372	0.0569002	0.186736
Propionibacterium phage Supernova	2041563	0.0349907	0.0516241	0.00050006	0.000343732
Bacillus yapensis	2492960	0.155347	0.135684	0.0938551	0.042931	0.133115	0.136726	0.17338	0.0778258	0.0456402	0.125951	0.17424	0.143249	0.0698233	0.0532221	0.14691	0.122306	0.173053	0.143254	0.0695476	0.0554391	0.146004	0.121234	0.0667776	0.173656	0.141543	0.144742	0.0509201
Propionibacterium phage pa27	2079400	0.0516058	0.0409066	0.00049426	0.00706672
Fusobacterium nucleatum	851	0.0575915	0.0482641	0.0231372	0.0213487
Pseudidiomarina aestuarii	624146	0.557433	0.507748	0.330444	0.157529	0.503261	0.537819	0.577057	0.300191	0.147705	0.500824	0.634938	0.612951	0.285066	0.134103	0.403981	0.485017	0.629131	0.613403	0.283225	0.133077	0.399951	0.47688	0.260332	0.612443	0.601956	0.394633	0.120825	0.469733	0.613263	0.590364	0.299951	0.137833	0.390329	0.465	0.605169	0.583333	0.298169	0.137469	0.387042	0.453341	0.586346	0.275896	0.565666	0.128486	0.379005	0.4381	0.561947	0.273976
Brucella sp. CMUL 015	1905697	0.126449	0.10599	0.0543896	0.0305207	0.112242	0.120315	0.104181	0.0543432	0.0311971	0.105413	0.0997455	0.127261	0.0532198	0.0251824	0.137238	0.102521	0.0993033	0.127316	0.0529896	0.0259952	0.136433
Xanthomonas hortorum	56454	0.111037	0.113964	0.0740703	0.0277895	0.117787	0.098535	0.138391	0.0506327	0.0279037	0.123389	0.151767	0.106372	0.0414218	0.0255581	0.0751379	0.119866	0.150813	0.106516	0.0412838	0.0266045	0.0746508
Violaceomyces palustris	1673888	0.029714	0.0259882	0.0183536	0.00706674
Marssonina coronariae	503106	0.385759	0.431058	0.303109	0.153137	0.437177	0.411117	0.382347	0.273179	0.147577	0.431235	0.412416	0.463153	0.270417	0.130268	0.332762	0.421978	0.409366	0.463412	0.268743	0.128455	0.329896	0.415494	0.250906	0.402744	0.456133	0.326116	0.115285	0.409765	0.40099	0.448648	0.276896	0.135733	0.321736	0.405962	0.396943	0.444175	0.275348	0.135349	0.319409	0.396555	0.387309	0.261277	0.433105	0.12472	0.313704	0.384283	0.374976	0.257065
Diversispora epigaea	1348612	0.0591221	0.0585342	0.0140076	0.00368967
Clostridium butyricum	1492	0.0541601	0.0542985	0.0227287	0.000343289
Pseudomonas sp. FW215-R3	2070671	0.178841	0.150935	0.100755	0.0453868	0.149692	0.182193	0.166436	0.0912565	0.0397067	0.151565	0.180511	0.178781	0.0822893	0.030346	0.179215	0.146937	0.179334	0.178808	0.0819179	0.0314588	0.178082	0.145507	0.07746	0.179164	0.176812	0.176465	0.0203871
Pneumocystis carinii	4754	0.0231022	0.0287759	0.0227287	0.0070432
Propionibacterium phage PAC9	1690813	0.0649314	0.026462	0.000494995	0.000343342
Clostridium sp. W14A	1849176	0.560785	0.524533	0.323738	0.168594	0.509264	0.560155	0.584372	0.27862	0.167548	0.504078	0.650727	0.629335	0.264487	0.158479	0.431638	0.499208	0.644697	0.629819	0.262842	0.154649	0.427101	0.490761	0.251673	0.627465	0.617673	0.421219	0.139989	0.483234	0.626619	0.605095	0.278521	0.156226	0.417135	0.47822	0.618239	0.597907	0.276888	0.15581	0.41345	0.465902	0.598811	0.261681	0.580134	0.14769	0.404433	0.449953	0.573545	0.257196
Fusobacterium necrophorum	859	0.356335	0.354593	0.311617	0.159286	0.348922	0.35579	0.372338	0.292696	0.152433	0.35082	0.399584	0.391371	0.279815	0.143698	0.283892	0.349327	0.396697	0.391599	0.278028	0.140132	0.281648	0.344826	0.264913	0.390321	0.38583	0.27867	0.123516	0.340667	0.387946	0.380056	0.294765	0.143723	0.277907	0.337963	0.384142	0.376618	0.293027	0.14331	0.276036	0.331181	0.375069	0.272186	0.368376	0.135228	0.271467	0.32238	0.363449	0.269662
Cystoisospora suis	483139	0.078436	0.0623977	0.0411733	0.0246012	0.0670623	0.0655311	0.0748007	0.0366566	0.0283855
Firmicutes bacterium	1879010	0.258646	0.250899	0.14717	0.081379	0.239892	0.266949	0.256719	0.140667	0.0725711	0.23995	0.269318	0.270957	0.136678	0.0710054	0.224308	0.238166	0.267491	0.271073	0.136042	0.0676452	0.222666	0.235643	0.129318	0.265181	0.267605	0.220566	0.057015	0.233231	0.262343	0.264289	0.140929	0.0709961	0.219545	0.231716	0.260236	0.262161	0.140299	0.0708503	0.218207
Rhizoctonia solani	456999	0.117416	0.116118	0.0657627	0.0447092	0.118757	0.117253	0.106779	0.0656793	0.0436062	0.11239	0.101974	0.140635	0.0676721	0.0406717	0.0953941	0.109292	0.101576	0.140629	0.0674104	0.0423471	0.094841
Corynebacterium macginleyi	38290	0.0269227	0.0490481	0.000498671	0.000335263
Plasmodium fragile	5857	0.201312	0.246087	0.132444	0.0677892	0.260094	0.220806	0.179368	0.1211	0.0655616	0.24854	0.183971	0.25036	0.119201	0.0516413	0.199458	0.239886	0.182742	0.250457	0.118624	0.0537511	0.198213	0.237142	0.113344	0.18225	0.247576	0.196516	0.0412985	0.234774	0.184504	0.244665	0.127414	0.0529516	0.185124	0.233119	0.183277	0.242884	0.126863	0.0528876	0.184122
Methanosarcina sp. MTP4	1434100	0.10071	0.173589	0.0900468	0.0383757	0.167473	0.143022	0.0967861	0.0763342	0.0361292	0.167558	0.108354	0.157591	0.0736429	0.0306253	0.0874314	0.166331	0.107826	0.157637	0.0733329	0.0266755	0.0868165
Hanseniaspora uvarum	29833	0.0670572	0.0671465	0.0415721	0.0207597	0.0811774	0.0618536	0.0607177	0.0320063	0.0201328
Streptococcus dysgalactiae	1334	21.8614	31.567	7.07959	1.01476	32.784	24.4508	21.827	5.31393	0.927776	31.4282	26.3018	35.4167	4.58308	0.802895	11.3023	29.8116	25.7716	35.475	4.48278	0.778358	10.9947	28.6008	3.80663	23.8217	34.0783	10.5945	0.650385	27.5116	24.5168	32.6793	5.44558	0.789969	10.1153	26.8288	23.846	31.8463	5.34702	0.783021	9.87828	25.1327	22.2873	4.28821	29.7813	0.706754	9.3072	22.9976	20.3158	4.16055
Absidia repens	90262	0.405147	0.444896	0.254631	0.125558	0.453292	0.411734	0.412962	0.219794	0.123328	0.446157	0.43893	0.487165	0.209251	0.110918	0.323149	0.434045	0.43577	0.48743	0.208113	0.109074	0.320424	0.427295	0.193646	0.423779	0.479621	0.316808	0.102283	0.421402	0.427225	0.471581	0.222447	0.108609	0.313096	0.417475	0.42284	0.466718	0.221316	0.108433	0.310868	0.407778	0.412311	0.199771	0.454584	0.110649	0.305473	0.39508	0.398852	0.198694
Ustilaginoidea virens	1159556	0.0356615	0.0370672	0.0275754	0.00379706
Escherichia coli	562	344.096	317.588	180.761	24.6291	310.929	334.017	383.641	156.585	19.9699	301.049	470.472	460.926	139.107	16.7284	186.054	285.429	460.868	461.736	135.671	16.7742	180.755	273.632	120.641	429.776	443.287	173.876	11.0686	263.091	437.342	424.854	162.801	17.5253	166.612	256.448	425.162	413.858	159.512	17.2397	162.517	239.968	396.816	132.659	386.658	13.6079	152.661	219.214	360.947	127.275
Achromobacter ruhlandii	72557	0.0385928	0.0485433	0.0227716	0.00377824
Campylobacter fetus	196	0.0360056	0.0312997	0.0228282	0.0103974
Macrococcus caseolyticus	69966	0.38363	0.352035	0.241568	0.140535	0.347809	0.383159	0.389726	0.214129	0.136934	0.346417	0.430292	0.415771	0.199725	0.13129	0.319093	0.338733	0.427163	0.416019	0.198683	0.130553	0.316438	0.334286	0.196738	0.418633	0.409799	0.31294	0.11285	0.330285	0.421927	0.403502	0.213428	0.126813	0.305443	0.327641	0.41761	0.399722	0.212315	0.126661	0.303321	0.321103	0.407388	0.199981	0.390243	0.123413	0.298133	0.312491	0.394194	0.199251
Lodderomyces elongisporus	36914	0.132658	0.12143	0.0925751	0.0630966	0.120173	0.121596	0.144196	0.0827053	0.0648523	0.121255	0.150962	0.122109	0.0839154	0.0570237	0.126781	0.12211	0.15003	0.122169	0.0835336	0.053611	0.126044	0.121006	0.0759947	0.150226	0.120878	0.125025	0.0546931
Cloacibacterium normanense	237258	0.378414	0.357026	0.21201	0.0861602	0.348655	0.385146	0.385432	0.174179	0.0860776	0.34726	0.422082	0.420539	0.171095	0.0638764	0.316126	0.339473	0.419062	0.420791	0.170287	0.060735	0.313508	0.334924	0.162306	0.408021	0.414622	0.310091	0.0420712	0.330868	0.411305	0.408349	0.174341	0.0695221	0.305796	0.328176	0.407038	0.404567	0.173583	0.069373	0.303682	0.321517	0.397227	0.169054	0.395091	0.0534316	0.29842
Sodiomyces alkalinus	1302862	0.0418618	0.0375124	0.031917	0.00704319
Microbacterium esteraromaticum	57043	0.130973	0.134121	0.0592617	0.0174283	0.140039	0.124843	0.127983	0.0456854	0.0200629	0.14099	0.138272	0.113583	0.0454409	0.0156807	0.118016	0.136843	0.137276	0.113752	0.0452635	0.0163042	0.117312
Anaeromyces robustus	1754192	0.026942	0.0466343	0.0228282	0.0171611
Raphidocelis subcapitata	307507	0.0327284	0.0660642	0.0186619	0.020649
Corynespora cassiicola	59586	0.0932688	0.069142	0.0319874	0.0240505	0.0642402	0.0902353	0.0846299	0.027492	0.0277001
Nesiotobacter exalbescens	197461	0.395749	0.384161	0.212732	0.142889	0.380242	0.39806	0.400889	0.18606	0.142416	0.380064	0.432967	0.445895	0.185187	0.137914	0.28652	0.375892	0.429898	0.446164	0.184247	0.135268	0.284233	0.370675	0.179417	0.41757	0.439198	0.281214	0.126753	0.365913	0.420776	0.432103	0.185513	0.140376	0.28032	0.362798	0.416477	0.427929	0.184685	0.140029	0.278418	0.355043	0.406325	0.183511	0.417695	0.131231	0.273794	0.344943	0.393164	0.18243
Venturia nashicola	86259	0.0385929	0.0457005	0.00935788	0.0103973
Streptococcus agalactiae	1311	1.03838	0.940895	0.448384	0.209955	0.902513	1.0032	1.14583	0.384125	0.200169	0.89262	1.31919	1.18029	0.359194	0.189314	0.687739	0.870796	1.30083	1.18143	0.356358	0.185875	0.677942	0.849871	0.329102	1.24387	1.15081	0.665069	0.174744	0.832033	1.25126	1.11958	0.3855	0.186906	0.657561	0.819978	1.22801	1.10117	0.382703	0.186363	0.649658	0.790826	1.17348	0.348799	1.05507	0.180141	0.630501	0.753327	1.10409	0.345128
Soehngenia saccharolytica	253256	0.0593734	0.0400148	0.0323325	0.00709731
Marinobacter sp. B9-2	2137198	0.333189	0.305046	0.182228	0.084157	0.304447	0.311137	0.353997	0.169535	0.071529	0.303608	0.386648	0.343417	0.15744	0.0634114	0.236621	0.292361	0.383919	0.343593	0.156726	0.0660625	0.234815	0.288807	0.132988	0.375901	0.339135	0.232496	0.078402	0.285749	0.377284	0.334587	0.169922	0.0642232	0.231956	0.283641	0.37353	0.331837	0.169215	0.0640597	0.23049	0.278538	0.364834	0.147924	0.324677	0.0704334	0.226862
Colletotrichum tanaceti	1306861	0.0534038	0.04018	0.018354	0.0103973
Pseudomonas sp. 2(2015)	1619950	0.0592875	0.0664475	0.0138174	0.00706672	0.0642272	0.0615327	0.0543449	0.0137525	0.00812954
Pseudomonas fluorescens	294	0.864947	0.725046	0.400783	0.182972	0.713303	0.814438	0.931502	0.352115	0.169903	0.71419	1.07183	0.942537	0.331448	0.152953	0.578974	0.679983	1.05848	0.943494	0.329009	0.153173	0.571562	0.665722	0.301768	1.0147	0.921166	0.561794	0.139726	0.653173	1.02568	0.899415	0.355057	0.156335	0.552907	0.645094	1.00801	0.885456	0.352642	0.155887	0.546955	0.624988	0.966874	0.323314	0.85117	0.146175	0.532487	0.598986	0.914186	0.321245
Anelloviridae sp.	2055263	0.246032	0.272956	0.218712	0.0940483	0.316411	0.1945	0.256786	0.263116	0.0803923	0.335753	0.312275	0.124463	0.242876	0.0709502	0.371025	0.318366	0.309125	0.124381	0.240355	0.0745603	0.36654	0.312981	0.212214	0.286671	0.12279	0.360575	0.0702068
Desulfococcus multivorans	897	0.457512	0.543143	0.242071	0.125099	0.570757	0.46161	0.455616	0.221599	0.114723	0.545816	0.488956	0.56754	0.208869	0.102173	0.343315	0.537037	0.485299	0.567894	0.207645	0.098189	0.340267	0.527343	0.191343	0.463453	0.557697	0.336151	0.0950022	0.518712	0.473671	0.547157	0.223864	0.0980085	0.334078	0.513009	0.468435	0.540985	0.222747	0.0977937	0.331581	0.498981	0.455941	0.194442	0.525808	0.105467	0.325544	0.480845	0.439915	0.192489
Rhizophagus clarus	94130	0.144502	0.144777	0.0851069	0.0607821	0.153388	0.125997	0.148135	0.0912739	0.0532127	0.154781	0.160392	0.132235	0.0907487	0.0426916	0.107425	0.15024	0.159398	0.132287	0.0903129	0.0444695	0.106773	0.148857	0.0776698	0.158541	0.130854	0.10587	0.0508889
Actinobacillus pleuropneumoniae	715	0.276742	0.245499	0.225563	0.118298	0.245991	0.265654	0.283178	0.209033	0.114036	0.245854	0.307864	0.29157	0.200324	0.0951884	0.233033	0.237574	0.305952	0.291703	0.199287	0.0993783	0.231391	0.234961	0.187021	0.300152	0.288194	0.229198	0.0903683	0.232701	0.302402	0.284621	0.207101	0.104649	0.225579	0.231127	0.299856	0.28246	0.206146	0.104407	0.224237	0.227329	0.293693	0.19171	0.276874	0.100587	0.220975
Catenaria anguillulae	109876	0.0567201	0.085914	0.0229287	0.010509	0.0860616	0.081727	0.0395937	0.0184059	0.00819858
Ignavibacteriae bacterium HGW-Ignavibacteriae-1	2013808	0.0569011	0.0486746	0.0273624	0.013976
Salmonella enterica	28901	1711.13	1378.89	1146.3	120.931	1313.72	1546.51	2106.56	973.53	96.304	1255.08	2625.13	2335.24	856.502	85.3636	677.232	1196.55	2571.61	2339.31	835.175	85.2106	657.874	1146.98	685.251	2408.31	2245.79	632.764	64.4424	1102.76	2453.57	2152.28	1003.95	90.6336	611.439	1074.88	2385.18	2096.51	983.602	89.1527	596.377	1005.71	2225.98	799.898	1958.54	70.5919	560.101	918.59	2024.54	771.198
Klebsiella aerogenes	548	1.84527	1.75969	0.811229	0.294771	1.71698	1.8444	1.95424	0.676412	0.280327	1.67972	2.27364	2.41981	0.626283	0.256085	1.14623	1.60198	2.23572	2.42399	0.618935	0.254525	1.12516	1.55388	0.559636	2.11938	2.34497	1.09767	0.233136	1.5103	2.14461	2.26692	0.679192	0.260193	1.06966	1.4833	2.09732	2.21881	0.671974	0.259158	1.05318	1.41524	1.98733	0.601862	2.10292	0.243667	1.01325	1.32927	1.84812	0.588869
Larkinella soli	1770527	0.0180498	0.051595	0.00935902	0.0171612
Propionibacterium virus PA6	1982269	0.0679357	0.0415146	0.000493194	0.00706672
Pseudomonas sp. MDMC216	2218662	0.0417603	0.0807289	0.000493559	0.00034353
Plasmodium berghei	5821	0.0569212	0.063667	0.0554845	0.0309546	0.0759901	0.0407082	0.0707184	0.0414652	0.0355933
Heterostelium album	2086695	0.0511284	0.0518073	0.0228282	0.00036139
Puccinia sorghi	27349	0.0937567	0.0878868	0.0742354	0.0410104	0.0727805	0.0911951	0.116674	0.0649023	0.0432204	0.0749683	0.124287	0.0737515	0.0584793	0.0404272	0.12917
Pseudonocardia autotrophica	2074	0.0180589	0.0315565	0.0274836	0.0103974
Tuber magnatum	42249	0.0415246	0.0521595	0.0273864	0.0340075	0.0457809	0.0570337	0.0303597	0.0362635	0.0313139
Propionibacterium virus PHL113M01	1982286	0.0494392	0.0316919	0.000495749	0.000343341
Purpureocillium lilacinum	33203	0.0779621	0.106093	0.0410629	0.0311665	0.100106	0.102892	0.0649029	0.0458041	0.0239645	0.102009	0.0666161	0.102974	0.050249	0.0153903	0.0833649
Corynebacterium diphtheriae	1717	2.25736	2.82801	0.885918	0.305515	2.91488	2.43065	2.25529	0.719333	0.292932	2.8487	2.66163	3.10809	0.657386	0.269758	1.44016	2.70288	2.61716	3.11379	0.649487	0.266388	1.41144	2.61242	0.589739	2.46767	3.00825	1.37369	0.242654	2.52804	2.50398	2.9028	0.720471	0.270266	1.3318	2.47634	2.44678	2.83831	0.712686	0.269238	1.30937	2.34614	2.31432	0.632461	2.68272	0.254456	1.25508	2.18243	2.14597	0.628158
Moraxella bovoculi	386891	0.0323375	0.0267076	0.0602137	0.0218571
Fannyhessea vaginae	82135	0.114421	0.10291	0.0940678	0.0386851	0.100468	0.117368	0.102479	0.0892933	0.0406458	0.0983331	0.120473	0.117036	0.0806802	0.0369694	0.104884	0.0957527	0.119838	0.117058	0.0803212	0.0385006	0.104248
Citrobacter sp. MH181794	2364774	0.0477248	0.0405467	0.0317784	0.0105276
Ahniella affigens	2021234	0.0655376	0.0748651	0.0324289	0.017247	0.0793499	0.0650347	0.0598041	0.0278727	0.0198234
Batrachochytrium dendrobatidis	109871	0.0326532	0.0312772	0.0141833	0.00368984
Rozella allomycis	281847	0.0907034	0.0850551	0.0678585	0.00369596	0.100502	0.0742791	0.0898242	0.0543432	0.00427044	0.0981917	0.105773	0.0685986	0.0491619	0.000502311	0.0633686
Corynebacterium propinquum	43769	37.4402	53.0604	13.0977	1.4941	55.1662	41.5038	37.2087	10.1583	1.31589	52.2627	44.8915	63.7915	8.85303	1.08019	17.4059	49.5637	43.9825	63.904	8.64373	1.04109	16.9242	47.5312	7.20051	40.8069	61.3678	16.297	0.824176	45.7148	41.7958	58.825	10.5112	1.08481	15.6322	44.5711	40.6458	57.3191	10.306	1.07353	15.2591	41.7317	37.9645	8.14544	53.5775	0.936286	14.361	38.1575	34.5685	7.83752
Moraxella bovis	476	0.0576894	0.068983	0.0878656	0.0222998	0.0713028	0.0466594	0.0860716	0.0812963	0.0170081
Murine leukemia virus	11786	0.0418632	0.0842463	0.0093581	0.0103973	0.0722025	0.0704304	0.0345161	0.0137525	0.00809844
Bacillus sp. AFS031507	2033496	0.340714	0.379781	0.191285	0.0971051	0.379817	0.362231	0.32895	0.156021	0.104045	0.376883	0.347088	0.4021	0.15354	0.0941649	0.272938	0.370349	0.345282	0.402299	0.152581	0.0913134	0.270765	0.36528	0.151555	0.328268	0.396575	0.267883	0.0808873	0.360745	0.339082	0.390695	0.155788	0.0964711	0.265109	0.357745	0.336044	0.387193	0.155134	0.0962679	0.263355	0.350297	0.329235	0.152349	0.378546	0.0859088	0.258884	0.340553	0.319866	0.150776
Aeromonas dhakensis	196024	0.036056	0.0323964	0.0231158	0.0212857
Marssonina brunnea	698440	0.0447078	0.0429188	0.0137393	0.0104175
Sphaceloma murrayae	2082308	0.0448833	0.0395764	0.00940054	0.00706672
Pseudourostyla cristata	293816	0.0238602	0.0171408	0.0326347	0.014165
Trypanosoma grayi	71804	0.03556	0.0345109	0.00935852	0.0104319
Blastococcus sp. CT_GayMR19	2559608	0.0297974	0.0630659	0.0319168	0.0241536
Arthrobacter sp. DWC3	2058893	0.079305	0.0718908	0.0555043	0.0139726	0.0829311	0.0498248	0.106703	0.036689	0.0162247
Sporolactobacillus sp. THM7-7	2511172	0.23737	0.214324	0.118216	0.0556995	0.214248	0.205493	0.273223	0.101489	0.0479117	0.209102	0.290819	0.253409	0.091492	0.0458512	0.134977	0.202414	0.289098	0.253507	0.0910474	0.0476681	0.134158	0.200346	0.0855486	0.284844	0.250479	0.132991	0.0406359	0.198475	0.284198	0.247451	0.101698	0.042656	0.136659	0.197199	0.281918	0.245594	0.101276	0.0426486	0.135934
Pseudomonas sp. FW305-47B	2070558	0.269673	0.23757	0.198524	0.0910442	0.224448	0.259248	0.286573	0.170491	0.0968307	0.224951	0.307779	0.256515	0.156322	0.0939315	0.254567	0.225619	0.305754	0.256619	0.155556	0.0900653	0.252799	0.223293	0.150068	0.301302	0.253415	0.250475	0.0781735	0.220972	0.309051	0.250443	0.164325	0.090581	0.234227	0.219583	0.30635	0.248479	0.163532	0.0904104	0.23287	0.215947	0.300016	0.151771	0.243966	0.0895036	0.229486
Aspergillus ellipticus	41066	0.458607	0.509752	0.277336	0.131216	0.508988	0.478654	0.466591	0.251301	0.120832	0.501421	0.502573	0.555822	0.240313	0.101782	0.37813	0.486604	0.498606	0.556188	0.238932	0.0993268	0.374552	0.47841	0.227132	0.483541	0.546429	0.369835	0.0786492	0.471243	0.48726	0.536471	0.252807	0.105033	0.364809	0.466487	0.481732	0.530463	0.251473	0.104796	0.361904	0.45477	0.468701	0.234812	0.515423	0.0929656	0.354813	0.439452	0.451897	0.231443
Propionibacterium phage pa35	2079407	0.0735975	0.0715969	0.000832999	0.000343283
Bacillus sp. AFS054943	2033506	0.523454	0.478143	0.31726	0.159307	0.468444	0.524039	0.547245	0.275809	0.152444	0.467652	0.615351	0.593459	0.260764	0.137201	0.415156	0.450967	0.60982	0.593905	0.259179	0.137461	0.410918	0.443734	0.24671	0.592355	0.583089	0.405391	0.122231	0.437428	0.596097	0.572206	0.275017	0.140158	0.398454	0.433235	0.588373	0.56549	0.273458	0.139774	0.395051	0.422914	0.570373	0.255672	0.548549	0.131845	0.38674	0.409351	0.547079	0.253083
Vibrio toranzoniae	1194427	0.252745	0.218428	0.122129	0.0711334	0.208501	0.248365	0.269132	0.105285	0.0612482	0.209397	0.295278	0.22988	0.109243	0.0521328	0.225454	0.20827	0.293597	0.229958	0.108706	0.0483655	0.223816	0.206144	0.100757	0.286285	0.227222	0.221704	0.0419456	0.204064	0.289995	0.224695	0.110303	0.0534999	0.218504	0.202792	0.287586	0.223009	0.109898	0.0532846	0.217205
Paenibacillus amylolyticus	1451	7.26135	9.94928	2.55432	0.533301	10.1898	7.98481	7.41018	1.96562	0.499725	9.7431	8.96433	11.6213	1.76952	0.440865	3.68353	9.29211	8.78972	11.6414	1.73638	0.429348	3.59208	8.92957	1.50405	8.17312	11.1985	3.4734	0.374379	8.6018	8.38938	10.7528	2.01105	0.44247	3.33632	8.39677	8.16847	10.485	1.98027	0.439754	3.26599	7.88694	7.65559	1.68261	9.82778	0.39758	3.09603	7.24563	7.00637	1.63794
Stylonychia lemnae	5949	1.01969	0.929151	0.59538	0.25202	0.905117	1.01362	1.0682	0.520872	0.240701	0.894006	1.20503	1.22109	0.485083	0.228541	0.711092	0.869937	1.18944	1.22232	0.480255	0.226054	0.700766	0.849084	0.443113	1.1469	1.19012	0.687301	0.20761	0.831189	1.1493	1.15763	0.528083	0.227326	0.672341	0.819205	1.12846	1.13817	0.523276	0.226521	0.664154	0.790103	1.08016	0.476472	1.08974	0.21396	0.644329	0.752664	1.01827	0.467758
Coemansia reversa	61392	0.0300376	0.0459637	0.0319188	0.0277224
Mycobacteriaceae bacterium 1482268.1	1834080	0.187304	0.137359	0.0517994	0.0308215	0.139921	0.171272	0.159972	0.0658138	0.0197104	0.140175	0.16746	0.183401	0.0635692	0.0103347	0.134285	0.136068	0.166371	0.183432	0.0633283	0.0106915	0.133482	0.134796	0.0543589	0.166431	0.181404	0.132361	0.00718474
Sulfolobus acidocaldarius	2285	6.50257	10.341	2.17426	0.472891	10.863	7.66603	6.23805	1.67459	0.443729	10.5173	7.57378	10.5379	1.48041	0.406493	3.3526	9.92667	7.42804	10.5554	1.45424	0.398571	3.27092	9.53625	1.27047	6.8948	10.1565	3.16379	0.351494	9.18681	7.09584	9.75303	1.69333	0.405812	3.02945	8.96639	6.91259	9.51253	1.6687	0.403645	2.96626	8.42049	6.48332	1.38995	8.91844	0.376449	2.8147	7.73302	5.94179	1.35142
Marinosulfonomonas sp. PRT-SC04	1527300	0.0507546	0.0479708	0.0362551	0.01052
Lactiplantibacillus mudanjiangensis	1296538	8.34716	11.4631	2.85457	0.549215	11.7588	9.25394	8.33471	2.27826	0.500858	11.2752	9.91964	13.1429	1.98842	0.44674	4.47297	10.7758	9.72717	13.1643	1.94999	0.433197	4.3585	10.3513	1.66274	9.04669	12.6574	4.21089	0.37705	9.96811	9.25538	12.1536	2.32435	0.441548	4.0427	9.72824	9.01078	11.8493	2.28712	0.438889	3.95507	9.13315	8.4418	1.83678	11.1009	0.409615	3.74367	8.3836	7.7221	1.79152
Sporolactobacillus sp. THM19-2	2511171	0.357035	0.311741	0.184162	0.0955849	0.305266	0.334809	0.382989	0.171436	0.0802517	0.304543	0.39926	0.376304	0.16817	0.0638693	0.271351	0.292985	0.396393	0.376512	0.167428	0.0664725	0.269278	0.289291	0.155004	0.389609	0.371429	0.266538	0.0564125	0.286176	0.388922	0.366214	0.178477	0.0689221	0.265026	0.283998	0.385118	0.363027	0.177652	0.0687843	0.263306	0.278737	0.375988	0.162872	0.354777	0.0647084	0.259141
Leptospira kmetyi	408139	1.20622	1.123	0.539846	0.22892	1.09253	1.17959	1.29323	0.465004	0.216829	1.07438	1.50341	1.41054	0.434169	0.201095	0.804906	1.03547	1.48097	1.41222	0.430215	0.198858	0.792388	1.00875	0.394037	1.40942	1.37257	0.775892	0.184165	0.985166	1.41717	1.33369	0.465925	0.202514	0.768502	0.969977	1.38943	1.30957	0.462027	0.201836	0.758403	0.932497	1.32486	0.420855	1.25047	0.191186	0.73393	0.884536	1.24284	0.414396
Amycolatopsis vastitatis	1905142	0.460999	0.410095	0.214516	0.0915485	0.398264	0.456254	0.47005	0.188067	0.0821275	0.394694	0.514688	0.525571	0.166835	0.0756027	0.344885	0.38532	0.51047	0.52592	0.166035	0.0726483	0.341828	0.379808	0.150048	0.494893	0.516973	0.337811	0.0708465	0.374898	0.497182	0.50787	0.188189	0.064617	0.336447	0.371644	0.491293	0.502379	0.18728	0.0644964	0.333926	0.363602	0.477687	0.1621	0.488612	0.0708206	0.327711	0.353059	0.45989	0.165006
Carnobacterium maltaromaticum	2751	0.0817431	0.0759396	0.0315792	0.0171931	0.0608942	0.090828	0.0861417	0.027193	0.0159482
Pseudomonas amygdali	47877	0.342612	0.339189	0.250288	0.130144	0.338536	0.340064	0.363039	0.227363	0.120861	0.337761	0.403024	0.378702	0.218203	0.0993729	0.27672	0.324643	0.40021	0.378911	0.217025	0.10394	0.274574	0.320461	0.194521	0.392582	0.37385	0.271729	0.104856	0.316896	0.391533	0.368689	0.227223	0.109266	0.271336	0.314451	0.387699	0.36553	0.226081	0.10901	0.269553	0.308499	0.378749	0.209656	0.35732	0.104014	0.26514	0.30054	0.367061	0.20743
Smittium culicis	133412	0.0447078	0.0313858	0.0272995	0.0103978
Gordonia sedimidis	2498852	0.337693	0.294614	0.197151	0.0798527	0.290179	0.343867	0.333071	0.166626	0.0744284	0.289039	0.348834	0.373812	0.158612	0.0628084	0.278949	0.278468	0.346491	0.374028	0.157825	0.0654068	0.276751	0.275125	0.146283	0.34051	0.368857	0.273883	0.0554985	0.272255	0.33892	0.363599	0.166957	0.0683856	0.27275	0.270264	0.335924	0.360405	0.166207	0.0682408	0.270933	0.265462	0.328498	0.15787	0.352103	0.0582173	0.266551
Stenotrophomonas maltophilia	40324	0.491187	0.470531	0.287607	0.136109	0.45939	0.48709	0.525132	0.252098	0.130268	0.457371	0.583602	0.543003	0.244121	0.115342	0.364884	0.449054	0.578521	0.543376	0.242732	0.112515	0.361509	0.441992	0.219024	0.564325	0.533864	0.357061	0.111401	0.4357	0.563694	0.524127	0.251358	0.119202	0.355097	0.431531	0.55665	0.51839	0.250036	0.118906	0.352319	0.421239	0.540217	0.239264	0.504149	0.106745	0.345527	0.40784	0.518948	0.235095
Bradyrhizobium canariense	255045	0.166352	0.13093	0.0776452	0.0355158	0.144725	0.13433	0.165216	0.0712696	0.0331409	0.137289	0.17254	0.139816	0.0641814	0.0368547	0.136117	0.1371	0.171372	0.139863	0.06394	0.0329763	0.135286
Plasmodiophora brassicae	37360	0.0628303	0.0747083	0.0460112	0.0104698	0.0791918	0.0695411	0.0547875	0.0321011	0.0159676
Gemella sp.	1966354	0.0272541	0.0344725	0.0321931	0.00712061
Enterobacter mori	539813	525.002	391.307	355.568	54.9858	377.734	469.549	616.218	326.11	43.8378	365.382	756.877	647.758	295.715	37.4217	282.892	345.17	741.454	648.89	288.363	38.8587	274.825	330.894	255.857	695.688	622.96	264.336	26.3834	318.153	703.038	597.038	340.237	41.2089	254.396	310.115	683.439	581.59	333.345	40.542	248.141	290.175	637.862	279.787	543.354	32.1713	233.069	265.072	580.166	266.659
Peptoniphilus rhinitidis	1175452	0.0829255	0.0783872	0.000493479	0.00368988	0.0786069	0.111903	0.036874	0.000700354	0.00427046
Chryseobacterium sp.	1871047	0.11686	0.117616	0.0317176	0.0171371	0.109282	0.133093	0.0960493	0.0317905	0.0158446	0.111255	0.12008	0.148564	0.0286315	0.0103348	0.0539229
Anaerococcus nagyae	1755241	0.0688462	0.0623795	0.000492699	0.0211664
Ciceribacter sp. F8825	2509717	0.263236	0.262646	0.212374	0.098937	0.261587	0.259407	0.280196	0.190272	0.0952659	0.26328	0.302149	0.263408	0.19003	0.0853909	0.222535	0.253971	0.30022	0.263518	0.189065	0.0889536	0.22097	0.250979	0.171627	0.29643	0.260379	0.218864	0.0860539	0.248477	0.296686	0.257165	0.191066	0.0972624	0.215875	0.246701	0.294205	0.255217	0.190194	0.0970518	0.214585	0.242418	0.288247	0.187313	0.250288	0.0831105	0.211426
Paenibacillus pabuli	1472	3.97184	3.58991	1.53259	0.36253	3.51631	3.82059	4.36023	1.2568	0.328955	3.41349	5.26559	5.10196	1.12232	0.290631	2.19345	3.21785	5.1688	5.10851	1.10486	0.288157	2.14425	3.10541	0.925501	4.84225	4.92168	2.07954	0.261818	3.00301	4.91829	4.73622	1.26205	0.298964	2.02596	2.93897	4.79387	4.62812	1.24461	0.297504	1.98729	2.78011	4.50636	1.03928	4.35316	0.276377	1.89386	2.57897	4.14169	1.00752
Enterococcus faecalis	1351	449.1	668.073	139.467	12.6569	693.367	518.647	433.814	103.907	10.9134	665.705	524.975	751.21	89.862	8.48814	224.687	631.571	514.268	752.529	87.6476	8.00713	218.286	605.422	72.3202	474.793	722.443	209.996	5.80781	582.091	488.52	692.375	107.205	8.41676	199.977	567.373	474.907	674.448	105.059	8.28982	195.06	530.853	443.243	83.1577	630.094	6.74538	183.225	484.887	403.161	80.6233
Xanthomonas arboricola	56448	0.0618862	0.0457006	0.0271845	0.0205826	0.048452	0.0567588	0.0540937	0.0227246	0.0236538
Micractinium conductrix	554055	0.0239883	0.0344131	0.0185035	0.00369509
Micromonas pusilla	38833	0.0356613	0.0400111	0.0184351	0.0104845
Choanephora cucurbitarum	101091	0.0265134	0.0372012	0.0183539	0.000343823
Solibacillus silvestris	76853	0.323303	0.331819	0.219725	0.131741	0.331893	0.308533	0.356114	0.195498	0.129503	0.326535	0.38142	0.349303	0.192013	0.116044	0.26549	0.318877	0.378882	0.349475	0.191047	0.115382	0.263493	0.314906	0.18099	0.370997	0.344811	0.260843	0.109168	0.311379	0.369425	0.340041	0.195291	0.120507	0.262397	0.309026	0.365984	0.337164	0.194397	0.120216	0.260712	0.303215	0.357813	0.185883	0.329989	0.1158	0.256607	0.295532	0.347257	0.183195
Suillus luteus	5384	0.0388236	0.0178545	0.0142104	0.0070318
Synechococcus sp. UW140	368503	0.0803524	0.114247	0.0458702	0.0338736	0.108851	0.0881967	0.0894175	0.0503775	0.027344	0.102711	0.0944327	0.134988	0.0455934	0.0201681	0.0317732
Torque teno midi virus 8	2065049	0.0247007	0.0145126	0.0449054	0.0142108
Corynebacterium phoceense	1686286	0.0297121	0.0342249	0.00935903	0.00370224
Pseudomonas sp. FSL W5-0203	1920491	0.138628	0.119837	0.110759	0.027392	0.124861	0.128891	0.146441	0.0954553	0.0198234	0.122749	0.163953	0.137472	0.0904274	0.0154404	0.0849731	0.119245	0.162923	0.137513	0.0899922	0.0160439	0.0843852
Methylocystis sp.	1911079	0.0391596	0.0404856	0.0273026	0.00710237
Desulfosporosinus acidiphilus	885581	0.0355699	0.0485606	0.000531424	0.000344792
Providencia rettgeri	587	0.0780337	0.090374	0.0409078	0.0103973	0.0953606	0.0860849	0.0650079	0.0319291	0.0119376
Bacillus wiedmannii	1890302	1.06741	1.03257	0.538948	0.230373	1.00692	1.08854	1.11043	0.460991	0.220301	0.999835	1.30892	1.26694	0.433343	0.20629	0.714111	0.97297	1.29087	1.26819	0.42939	0.202852	0.703711	0.948267	0.394153	1.23646	1.23435	0.690182	0.188021	0.927223	1.24898	1.20002	0.464412	0.206324	0.674496	0.913085	1.22569	1.17962	0.460558	0.205666	0.66626	0.878833	1.17134	0.418369	1.12869	0.196052	0.646319	0.834867	1.10203	0.411578
Komagataeibacter hansenii	436	0.438646	0.42698	0.282222	0.137871	0.418265	0.43866	0.463805	0.252934	0.128976	0.417957	0.496516	0.481556	0.237397	0.121008	0.356856	0.413943	0.49256	0.481851	0.236065	0.117601	0.353619	0.407834	0.220802	0.483093	0.47398	0.349393	0.104746	0.402321	0.482589	0.465903	0.254985	0.116383	0.344221	0.398684	0.477135	0.461193	0.25363	0.116104	0.341604	0.389666	0.464411	0.231178	0.449663	0.11325	0.335172	0.377947	0.447869	0.227949
Leishmania major	5664	0.0663787	0.074547	0.0547429	0.0415974	0.0708815	0.0746964	0.0604713	0.0498337	0.0481666	0.0733156	0.0675583	0.0633716	0.0537391	0.0462296	0.0737782
Pectobacterium atrosepticum	29471	1.0777	1.17386	0.506575	0.230703	1.14845	1.11976	1.12368	0.44584	0.218589	1.11797	1.28452	1.39175	0.421968	0.205274	0.70058	1.098	1.26618	1.39302	0.41829	0.199952	0.690514	1.06841	0.385526	1.19627	1.35477	0.677273	0.186653	1.04359	1.22378	1.31567	0.449574	0.204052	0.664015	1.02657	1.20078	1.29281	0.445911	0.203383	0.656033	0.985975	1.14795	0.405365	1.23511	0.194543	0.636608	0.9338	1.08062	0.39901
Naematelia encephala	71784	0.0783576	0.0971527	0.0363209	0.003778	0.100791	0.0909873	0.0650483	0.0273719	0.00427046
Eimeria praecox	51316	0.0793902	0.0726239	0.0182733	0.00704323	0.0610164	0.0834255	0.0806613	0.0137524	0.00809844
Methanosarcina mazei	2209	0.0445815	0.0515234	0.0231332	0.0240372
Staphylococcus aureus	1280	122.853	178.4	38.7941	3.81607	185.466	140.051	120.012	29.0709	3.29932	178.339	145.359	201.139	25.1652	2.63661	61.7477	168.689	142.396	201.495	24.5496	2.52406	59.9961	161.714	20.385	131.549	193.456	57.7331	1.899	155.505	135.285	185.425	29.9254	2.64372	55.0259	151.578	131.523	180.635	29.3301	2.60927	53.6824	141.853	122.784	23.3378	168.774	2.17224	50.4457	129.596	111.713	22.4419
Pseudomonas sp. T	1938440	0.365934	0.343802	0.225933	0.126387	0.343338	0.35758	0.373922	0.199375	0.124046	0.34298	0.401348	0.387162	0.197776	0.107738	0.303501	0.329349	0.398554	0.387369	0.196798	0.112546	0.300964	0.324992	0.189024	0.39132	0.382037	0.297659	0.101828	0.321306	0.392076	0.376551	0.19992	0.119092	0.292892	0.318762	0.388253	0.373208	0.199005	0.118804	0.29085	0.312586	0.379266	0.192678	0.364548	0.112001	0.285814	0.304326	0.367588	0.188573
Rhizoclosmatium globosum	329046	0.0861381	0.0843054	0.0501117	0.0172665	0.0880569	0.0741422	0.0990333	0.0362633	0.019849	0.0859385	0.104226	0.0804927	0.0328056	0.0254339	0.0532006
Faecalitalea cylindroides	39483	1.78538	2.19351	0.902967	0.314607	2.21569	1.90966	1.80323	0.782857	0.297442	2.09371	2.09504	2.82869	0.736194	0.268234	1.01537	2.01598	2.06052	2.83368	0.727006	0.26347	0.99758	1.95183	0.657856	1.95242	2.73849	0.974493	0.235703	1.89294	1.98658	2.64477	0.802424	0.271551	0.946842	1.8566	1.9422	2.5863	0.792989	0.270351	0.933288	1.76521	1.84254	0.698559	2.44688	0.253059	0.899844	1.65024	1.71536	0.680641
Paenibacillus panacisoli	363858	0.140143	0.123256	0.0787774	0.0413465	0.113826	0.150892	0.134094	0.0642775	0.0436302	0.119305	0.138507	0.149055	0.0537608	0.0356944	0.164848	0.11602	0.137683	0.14906	0.0535264	0.0371276	0.163854
Staphylococcus caprae	29380	0.0300403	0.026074	0.0295316	0.0106826
Streptococcus halotolerans	1814128	0.0386039	0.0263132	0.00484683	0.00370219
Theileria annulata	5874	0.0386488	0.0402672	0.0138174	0.0104326
Streptococcus sp. GMD4S	1169673	1.74076	1.89259	0.693034	0.259915	1.91298	1.73993	1.82194	0.583445	0.246234	1.86092	2.12282	2.31818	0.529748	0.227668	1.03266	1.75825	2.08763	2.32233	0.524089	0.226379	1.01452	1.70521	0.473959	1.98458	2.24733	0.990956	0.209067	1.65495	1.99762	2.17297	0.585146	0.227298	0.974013	1.62489	1.95369	2.12729	0.579503	0.226513	0.959773	1.54794	1.85315	0.509751	2.01736	0.217692	0.924907	1.45122	1.72555	0.507127
Toxoplasma gondii	5811	13.8678	21.1006	4.61736	0.729662	22.1026	16.1929	13.1364	3.50231	0.677037	21.3985	15.7254	22.6321	3.1078	0.581921	7.63656	20.1605	15.4139	22.6709	3.04025	0.569312	7.43258	19.3452	2.5536	14.2483	21.7848	7.1683	0.491929	18.6193	14.6492	20.8992	3.58187	0.591501	6.83921	18.161	14.2542	20.3694	3.51815	0.587057	6.68244	17.0239	13.3356	2.9077	19.0598	0.523181	6.30616	15.5902	12.1731	2.86145
Longilinea arvoryzae	360412	0.151273	0.144564	0.0650486	0.0415225	0.150152	0.138851	0.161804	0.060627	0.0314139	0.146128	0.181021	0.17223	0.0589867	0.0153897	0.0856333	0.141917	0.180003	0.17226	0.058702	0.0160155	0.0851229	0.140624	0.0578118	0.172494	0.170326	0.0843801	0.00727732
Aliidiomarina sp. B3213	2249757	0.334092	0.286717	0.218498	0.0873922	0.285177	0.31383	0.353075	0.188735	0.0823598	0.285925	0.362782	0.338969	0.177644	0.0726336	0.271334	0.275975	0.36034	0.33914	0.176767	0.0758531	0.269264	0.272807	0.169585	0.354392	0.334881	0.26658	0.0584288	0.2701	0.355112	0.330526	0.194686	0.072578	0.262562	0.268226	0.351772	0.327881	0.193717	0.0724253	0.260905	0.26368	0.344112	0.171339	0.320995	0.0745848	0.256714
Pfiesteria piscicida	71001	0.143392	0.17658	0.0978233	0.0595072	0.173536	0.13376	0.176888	0.0875768	0.0566618	0.1652	0.186783	0.161326	0.0887413	0.0462856	0.109518	0.164019	0.185827	0.161365	0.0883188	0.042835	0.108842	0.162385	0.0919713	0.178301	0.159619	0.107906	0.0272992
[Candida] glabrata	5478	0.0268643	0.045839	0.0182733	0.00704323
Moraxella cuniculi	34061	0.0310774	0.0200851	0.0378084	0.0072545
Paenibacillus apiarius	46240	0.0239297	0.0313859	0.0271816	0.000432814
Bacillus subtilis	1423	1.50178	1.71544	0.765473	0.283317	1.71534	1.58735	1.53585	0.644692	0.272035	1.67109	1.79126	2.05918	0.604495	0.249888	0.95711	1.60834	1.76279	2.06201	0.597686	0.246345	0.940865	1.55964	0.5393	1.6746	1.99713	0.919664	0.227156	1.51623	1.70515	1.93385	0.651975	0.25275	0.888738	1.4888	1.66926	1.89442	0.6453	0.251838	0.87624	1.4205	1.58708	0.578455	1.79878	0.237071	0.845799	1.33404	1.48252	0.566806
Bacteroidetes bacterium	1898104	0.063835	0.0662297	0.0604792	0.0210887	0.0641853	0.057702	0.0708086	0.0556868	0.0244606
Anaerolineaceae bacterium	2024896	0.029494	0.052035	0.0510617	0.0172586
Verrucomicrobia bacterium	2026799	0.141114	0.154332	0.0794608	0.0309366	0.156331	0.122186	0.150773	0.0702611	0.0394873	0.151735	0.15858	0.161063	0.0627437	0.0306131	0.0841601	0.147195	0.157578	0.161086	0.0625028	0.0318521	0.08358	0.145807	0.0542942	0.15677	0.159327	0.0828813	0.0339033
Cupriavidus taiwanensis	164546	0.0210563	0.0256377	0.0362551	0.010631
Propionibacterium virus Procrass1	1982304	0.0495234	0.0381083	0.000496414	0.000343137
Vibrio ouci	2499078	0.135752	0.169364	0.0706275	0.0656975	0.190617	0.118128	0.133992	0.0698825	0.0684635	0.18644	0.137201	0.128712	0.0721584	0.0659677	0.11159	0.180552	0.136362	0.128707	0.0718628	0.0686234	0.110899	0.178659	0.0735876	0.136314	0.127152	0.109966	0.0602257
Basidiobolus meristosporus	423460	0.111684	0.132479	0.0502222	0.0207039	0.121325	0.113871	0.146742	0.0183869	0.02786	0.126674	0.158264	0.129588	0.0165349	0.0154481	0.0861746	0.123035	0.157296	0.129658	0.0166081	0.0160752	0.0856715
Ophiocordyceps camponoti-rufipedis	2004952	0.0330929	0.0230504	0.0273014	0.000410594
Corynebacterium sp. KPL1818	1203559	0.0366978	0.0448012	0.000811049	0.000344847
Staphylococcus hominis	1290	251.827	342.704	88.6354	8.0373	352.028	281.339	246.547	69.6718	6.73683	335.525	295.623	422.325	60.7078	5.18693	121.276	319.677	289.596	423.051	59.2138	4.88338	117.821	306.457	48.5962	268.539	406.15	113.349	3.49737	294.641	275.328	389.257	72.3667	5.20116	107.992	287.197	267.663	379.174	70.9151	5.12677	105.341	268.729	249.822	55.6226	354.242	4.17762	98.9589	245.471	227.247	53.5254
Dentipellis fragilis	205917	0.0267872	0.0427401	0.00920688	0.0037774
Gymnopus luxurians	206324	0.170182	0.220573	0.174814	0.0837569	0.228954	0.179667	0.164967	0.16802	0.084639	0.222402	0.158282	0.233985	0.167566	0.0809896	0.110463	0.221782	0.157314	0.234073	0.166449	0.077572	0.109778	0.219474	0.165007	0.150937	0.231266	0.108873	0.0625998	0.217211	0.15276	0.228635	0.16959	0.0850235	0.112705	0.215831	0.151804	0.226887	0.168835	0.0848561	0.112172
Gracilariopsis chorda	448386	0.023962	0.03143	0.0275219	0.0071205
Pseudonocardia sp. Ae717_Ps2	1885573	0.0504715	0.0513354	0.0183537	0.00369128
Pseudomonas sp. 2822-17	1712678	0.432984	0.39447	0.276736	0.165248	0.386839	0.434924	0.430478	0.266416	0.15225	0.385203	0.476071	0.476273	0.257128	0.146936	0.327479	0.3771	0.472416	0.476584	0.255572	0.146147	0.32456	0.371861	0.243874	0.460924	0.468952	0.320698	0.134049	0.367196	0.461561	0.46119	0.267968	0.149216	0.31874	0.364101	0.456545	0.456533	0.266485	0.148832	0.316337	0.356442	0.444653	0.251454	0.444906	0.141767	0.310504	0.346399	0.429373	0.247694
Anaerococcus provencensis	938293	0.0551637	0.0473572	0.000493871	0.00368987
Gammaproteobacteria bacterium	1913989	0.185791	0.157874	0.0978927	0.0279726	0.162533	0.167358	0.200344	0.0648057	0.0322601	0.153729	0.232353	0.186577	0.0626948	0.0255283	0.119744	0.149081	0.23097	0.186616	0.0624556	0.0265686	0.119036	0.14766	0.0575243	0.226892	0.184457	0.118024	0.0207293
Moorea producens	1155739	0.209351	0.201548	0.128403	0.0531799	0.210599	0.180031	0.240304	0.115568	0.0443914	0.201516	0.258129	0.203526	0.11184	0.0364995	0.144653	0.195135	0.256354	0.203572	0.111277	0.0379933	0.143724	0.193174	0.102704	0.253666	0.201262	0.142401	0.0280838	0.191379	0.24946	0.19906	0.11489	0.0434305	0.147405
bacterium 2013Ark19i	1561004	0.246426	0.280141	0.134512	0.0705561	0.286697	0.248803	0.234037	0.139263	0.0605423	0.283591	0.253347	0.275709	0.128511	0.0627641	0.162457	0.279589	0.25172	0.27583	0.127936	0.0595352	0.161419	0.27641	0.120511	0.248418	0.272444	0.160036	0.0494175	0.273508	0.254321	0.269144	0.133395	0.0626917	0.150311	0.271608	0.252352	0.267072	0.132828	0.0625784	0.149479
Plasmodium ovale	36330	1368.21	1219.47	651.681	75.8092	1192.54	1253.88	1625	518.114	63.8022	1151.1	2003.73	1786.1	451.79	53.8505	651.321	1092.6	1962.84	1789.25	440.543	53.5003	632.737	1047.36	367.088	1830.08	1717.74	608.628	40.8106	1007.01	1850.62	1646.27	532.491	55.3851	596.733	981.541	1798.99	1603.62	521.701	54.495	582.06	918.383	1679	426.446	1498.13	44.0728	546.658	838.841	1527.12	411.763
Testicularia cyperi	1882483	0.0447082	0.0370633	0.0365577	0.0339648
Bordetella bronchiseptica	518	17.2298	20.96	6.14621	0.833743	20.8252	18.6699	17.6292	4.74706	0.749679	19.9697	21.1808	26.8955	4.16716	0.64704	8.49783	19.1981	20.7594	26.9408	4.07438	0.620042	8.26834	18.4259	3.43998	19.2966	25.8851	7.97276	0.508427	17.73	19.7035	24.8288	4.90839	0.642888	7.68152	17.2935	19.1668	24.1971	4.81804	0.637527	7.50475	16.2097	17.9212	3.82629	22.6333	0.573249	7.07745	14.8489	16.344	3.69514
Arachnia propionica	1750	0.171292	0.12485	0.066298	0.0452109	0.124784	0.146082	0.185613	0.050427	0.044748	0.12184	0.186605	0.161008	0.0538821	0.0362661	0.141358	0.118332	0.185383	0.161022	0.053647	0.0377377	0.140444
Chloroflexi bacterium	2026724	0.323875	0.341706	0.194633	0.0980732	0.34606	0.323221	0.338287	0.172445	0.0902042	0.34006	0.360793	0.356737	0.163604	0.0760579	0.278997	0.333684	0.358509	0.356927	0.162755	0.0730865	0.276915	0.329471	0.150822	0.348808	0.352193	0.274176	0.0653095	0.325695	0.353268	0.347413	0.172936	0.0751656	0.269798	0.323194	0.349993	0.344536	0.172162	0.0750153	0.268114	0.31699	0.34238	0.157984	0.337396	0.0720723	0.263933	0.308824	0.332344	0.156441
Crocosphaera watsonii	263511	0.032656	0.036895	0.0139299	0.0070786
Monosiga brevicollis	81824	0.346529	0.318176	0.247082	0.138314	0.306161	0.350426	0.35594	0.232667	0.129264	0.307879	0.385263	0.383362	0.223268	0.110348	0.301269	0.296241	0.382645	0.383573	0.222034	0.115391	0.298871	0.292548	0.206351	0.373891	0.378228	0.295726	0.109371	0.289397	0.374099	0.372747	0.231491	0.120142	0.294037	0.287214	0.370495	0.369419	0.230333	0.119849	0.292063	0.281934	0.362069	0.218641	0.36079	0.110478	0.287174	0.274851	0.351066	0.216856
Candidatus Bathyarchaeota archaeon	2026714	0.0297975	0.037115	0.00935903	0.00368985
Mycolicibacterium peregrinum	43304	0.214115	0.215928	0.0229129	0.0140275	0.203816	0.224426	0.197385	0.00932242	0.0161503	0.205914	0.224046	0.229644	0.00448662	0.00545979	0.179062	0.198329	0.222751	0.229748	0.00456813	0.00561809	0.177819	0.196011	0.00422859	0.212128	0.226807	0.176157	0.00727127
Salpingoeca rosetta	946362	0.326305	0.316649	0.213749	0.125178	0.322398	0.323686	0.324441	0.194486	0.121408	0.321403	0.35493	0.347085	0.190306	0.10829	0.266528	0.314007	0.352516	0.347246	0.189371	0.107259	0.264517	0.310149	0.177236	0.346565	0.342641	0.26187	0.100951	0.306716	0.345386	0.337917	0.196426	0.111511	0.260614	0.304428	0.342172	0.335075	0.195515	0.111259	0.258955	0.298771	0.334593	0.189197	0.327986	0.101012	0.254861	0.291293	0.324812	0.188273
Ascobolus immersus	5191	0.0475213	0.060685	0.0226721	0.013791
Moraxella canis	90239	0.0368408	0.0205233	0.0277663	0.00720577
Blastopirellula cremea	1031537	0.113373	0.10088	0.0780455	0.0310719	0.108492	0.0974763	0.12671	0.0550458	0.0357878	0.102219	0.141221	0.105872	0.0500249	0.0357055	0.0862376	0.0994173	0.14032	0.105804	0.0498068	0.0371351	0.0856334
Kipferlia bialata	797122	0.04452	0.0400668	0.0226718	0.024076
Priestia aryabhattai	412384	0.0504414	0.0257085	0.0319862	0.0137533
Porcine type-C oncovirus	369960	0.0267723	0.0458887	0.00484712	0.000344852
Tetrabaena socialis	47790	0.0448998	0.031559	0.0138801	0.0104319
Lactiplantibacillus plantarum	1590	0.0807563	0.0574488	0.0362552	0.0174681	0.060264	0.0777233	0.0647476	0.0365554	0.0160562
Thraustotheca clavata	74557	0.0200354	0.0424674	0.0326043	0.00709042
Leuconostoc sp. DORA_2	1403934	247.427	197.785	167.885	17.0963	188.923	220.579	306.692	142.781	13.6357	180.579	378.017	333.459	125.576	11.6779	102.306	171.8	370.305	334.027	122.452	11.6832	99.3988	164.708	99.6966	346.809	320.693	95.6204	8.85819	158.367	353.295	307.359	147.175	12.5279	92.2313	154.373	343.459	299.397	144.195	12.326	89.9709	144.463	320.567	117.187	279.718	9.68974	84.5226	131.986	291.588	113.015
Rhodococcus erythropolis	1833	0.0478608	0.048743	0.00935929	0.0138898
Dolosigranulum pigrum	29394	0.0963972	0.196459	0.131008	0.0292608	0.215589	0.124699	0.0971006	0.111812	0.0250608	0.21584	0.091916	0.157517	0.112015	0.0212727	0.0609902
Leptospira congkakensis	2484932	0.990205	1.3011	0.601642	0.246991	1.3617	1.06181	0.979069	0.528144	0.238475	1.30776	1.12481	1.44061	0.498973	0.223151	0.597747	1.25232	1.11043	1.44234	0.49405	0.221391	0.589968	1.2177	0.456436	1.06417	1.4015	0.579671	0.202149	1.18635	1.07292	1.36148	0.533208	0.226914	0.572359	1.16676	1.05362	1.33666	0.528279	0.226061	0.566124	1.11777	1.00985	0.478909	1.27584	0.214161	0.550852	1.05551	0.953761	0.473043
Actinobacteria bacterium 13_1_20CM_3_71_11	1803477	0.117856	0.151259	0.0741009	0.0343021	0.160866	0.11045	0.136882	0.0643732	0.0275941	0.15337	0.140758	0.130635	0.0623149	0.0203696	0.0963488	0.153375	0.139896	0.130663	0.0620787	0.0159197	0.0957251
Leptomonas seymouri	5684	0.0415058	0.0205039	0.0138177	0.0070432
Dictyostelium purpureum	5786	0.0901808	0.0758487	0.0677944	0.0348062	0.0567845	0.0992946	0.116093	0.0498673	0.0320867	0.0626846	0.11825	0.0971847	0.0492494	0.0258465	0.0964483
Sanguibacteroides justesenii	1547597	2.22674	2.04638	0.810462	0.284782	1.9614	2.22223	2.40259	0.659844	0.26857	1.93042	2.8651	2.77962	0.609129	0.243968	1.3749	1.85375	2.81709	2.78454	0.602056	0.240037	1.34787	1.79565	0.533924	2.65311	2.69142	1.31272	0.223597	1.74319	2.67962	2.59949	0.663526	0.245334	1.29116	1.71049	2.61745	2.54255	0.65654	0.244369	1.26965	1.62845	2.47407	0.581254	2.40598	0.231187	1.21759	1.52498	2.29133	0.573486
Aerococcus sp. HMSC23C02	1581058	0.288495	0.28837	0.172041	0.0780577	0.290072	0.272827	0.320982	0.150777	0.0688694	0.290504	0.337394	0.300787	0.1452	0.057304	0.211759	0.280304	0.335174	0.300923	0.144545	0.0596496	0.210291	0.277038	0.131799	0.329781	0.297254	0.208399	0.0551105	0.274265	0.328256	0.293476	0.156725	0.0582745	0.209899	0.272339	0.325279	0.291203	0.15602	0.0581827	0.208687	0.267663	0.318429	0.141282	0.285337	0.0575296	0.205644
Vibrio vulnificus	672	462.986	357.738	280.496	28.3716	344.012	403.12	571.335	234.918	22.7464	330.345	708.391	590.136	205.856	18.2373	210.412	313.388	693.933	591.182	200.753	18.2599	204.413	300.424	165.498	649.208	567.567	196.615	13.1257	288.863	654.295	543.965	241.941	19.6044	193.635	281.562	636.053	529.878	237.044	19.2854	188.881	263.465	593.649	193.082	495.039	14.9008	177.411	240.676	539.97	186.028
Arcobacter sp. CECT 8989	2044509	1.0392	1.01527	0.519667	0.227004	0.98352	1.05502	1.09153	0.444286	0.218282	0.976247	1.25227	1.23287	0.414674	0.206702	0.722165	0.968122	1.23539	1.23388	0.411018	0.200263	0.711588	0.943308	0.381352	1.18374	1.20165	0.697852	0.184227	0.923007	1.19756	1.16774	0.444444	0.203022	0.679002	0.908581	1.17555	1.14878	0.44087	0.202388	0.670689	0.874647	1.1243	0.404252	1.10016	0.192015	0.650556	0.830903	1.0589	0.399522
Saccharospirillum mangrovi	2161747	0.0760441	0.086931	0.0276914	0.0241677	0.0869958	0.0746867	0.0805636	0.0277955	0.0199472
Propionibacterium phage PacnesP2	1983621	0.064468	0.0544646	0.000494942	0.000343141
Pseudogymnoascus sp. VKM F-4515 (FW-2607)	1420909	0.0656316	0.0733609	0.0411495	0.0137524	0.0766618	0.0746106	0.0494361	0.0366365	0.015828
Serratia sp. MYb239	2033438	0.0357129	0.0318984	0.0138177	0.00370381
Peptoniphilus lacydonensis	1673725	0.0852975	0.0759649	0.00942152	0.000342118	0.0861917	0.107932	0.0368485	0.00484974	0.00046146
Rhizobacter sp. Root404	1736528	0.346023	0.323641	0.224654	0.0814757	0.324875	0.334523	0.366177	0.203115	0.067278	0.323133	0.394129	0.371433	0.192457	0.0525267	0.256926	0.310862	0.391448	0.371633	0.191485	0.0546817	0.254918	0.306947	0.17299	0.382799	0.36665	0.252346	0.0427001	0.303615	0.383462	0.361549	0.202607	0.0594947	0.252357	0.301318	0.379814	0.35844	0.201626	0.059399	0.250696	0.295736	0.371065	0.179931	0.350371	0.0583044	0.246718
Fusobacterium periodonticum	860	0.0363115	0.0205779	0.0235487	0.0139556
Hortaea werneckii	91943	0.0297927	0.0488758	0.0138799	0.00704322
Bipolaris oryzae	101162	0.0418791	0.0458249	0.0271848	0.017276
Streptococcus hillyeri	2282420	0.156531	0.156381	0.12289	0.0562166	0.140165	0.17706	0.153203	0.120932	0.0486756	0.146704	0.154403	0.173898	0.113848	0.0516281	0.14805	0.146861	0.153424	0.173965	0.113283	0.0480717	0.147115	0.145439	0.100995	0.147165	0.172004	0.145847	0.0551432
Helicobacter pylori	210	6.68142	9.5639	2.61719	0.540769	9.91489	7.46879	6.64059	2.04782	0.50953	9.458	7.88726	11.02	1.88782	0.443768	3.46096	9.05809	7.73476	11.0416	1.85214	0.430679	3.376	8.70556	1.57221	7.18688	10.624	3.26535	0.382437	8.38629	7.35156	10.2008	2.11152	0.451146	3.15831	8.18697	7.15919	9.94686	2.07873	0.448382	3.0922	7.69054	6.71366	1.77401	9.326	0.401958	2.93274	7.06637	6.14929	1.7152
Pseudoalteromonas agarivorans	176102	1.22097	1.09377	0.621734	0.241605	1.05994	1.21298	1.27679	0.533102	0.229308	1.04955	1.48268	1.42779	0.494562	0.21159	0.858861	1.02436	1.46123	1.42924	0.489501	0.207487	0.845041	0.997669	0.443604	1.40663	1.38934	0.826967	0.189896	0.975066	1.40584	1.3493	0.533715	0.212228	0.808399	0.959778	1.37855	1.32529	0.528785	0.211456	0.797444	0.922932	1.31471	0.477988	1.26538	0.198724	0.771031	0.87562	1.23347	0.472876
Atlantic salmon swim bladder sarcoma virus	348296	0.0210071	0.0371149	0.0227287	0.0036899
Pseudomonas aeruginosa	287	2.36755	2.5751	0.757764	0.306145	2.68638	2.2625	2.2865	0.645557	0.299498	2.62924	2.45472	2.86064	0.604394	0.274581	1.6945	2.52878	2.4141	2.86545	0.597601	0.268907	1.65861	2.44467	0.547548	2.26556	2.76835	1.6122	0.248051	2.36656	2.28593	2.67373	0.660457	0.270956	1.57613	2.3189	2.23377	2.6137	0.653592	0.269923	1.54819	2.19803	2.11446	0.57913	2.47209	0.259613	1.48021	2.04666	1.96358	0.572302
Corallococcus interemptor	2316720	0.629981	0.544779	0.284707	0.121709	0.525852	0.607971	0.662548	0.243041	0.115435	0.523115	0.751069	0.687244	0.226293	0.108973	0.420469	0.505441	0.743364	0.687832	0.225027	0.107121	0.415937	0.496544	0.209021	0.712446	0.67406	0.409953	0.097706	0.488743	0.720178	0.660215	0.245918	0.105438	0.409054	0.483579	0.70973	0.651744	0.244612	0.105204	0.405315	0.470885	0.685499	0.223749	0.630536	0.100331	0.396198	0.454313	0.654176	0.228701
Prevotella marshii	189722	0.0639871	0.0805524	0.0324371	0.034905	0.068339	0.084686	0.0572909	0.0424064	0.027826
Chamaesiphon polymorphus	2107691	0.0506055	0.0488082	0.000832966	0.000344415
Actinobacteria bacterium	1883427	0.0665381	0.0574259	0.0539302	0.0171046	0.053078	0.0738687	0.0703359	0.0450019	0.0119376
Mycobacterium leprae	1769	760.751	561.507	476.496	77.3413	526.819	714.257	856.241	439.766	61.9848	513.045	1041.15	951.754	394.422	54.441	451.702	487.888	1019.91	953.398	384.595	55.6772	438.806	467.684	341.632	950.063	915.309	422.056	39.2045	449.663	968.99	877.189	459.995	57.4211	401.552	438.307	941.995	854.501	450.643	56.4821	391.662	410.117	879.152	373.659	798.289	46.2268	367.863	374.61	799.62	357.37
Rasamsonia emersonii	68825	0.075232	0.0715368	0.0273636	0.0206964	0.0790377	0.0738071	0.0644849	0.0228747	0.0198993
Halorubrum sp. SS7	2518119	0.189536	0.215075	0.176434	0.0639911	0.225215	0.197507	0.184274	0.152035	0.0661383	0.223882	0.195931	0.220115	0.140913	0.0637709	0.145791	0.216682	0.194609	0.220186	0.14025	0.0664493	0.144908	0.214394	0.12434	0.19362	0.217704	0.143697	0.0709604	0.21243	0.196589	0.215239	0.146331	0.069474	0.135222	0.21105	0.195152	0.213696	0.145738	0.0693251	0.134509
Puccinia striiformis	27350	0.0839568	0.0682761	0.0230139	0.0142285	0.0747643	0.0692416	0.079487	0.0230097	0.0124152
Paraburkholderia sp. UYCP14C	2511130	0.0692133	0.0570614	0.0273026	0.0139451	0.0562833	0.0738806	0.0698742	0.00928665	0.0160401
Trichoderma harzianum	5544	0.0789814	0.15547	0.0696988	0.0453266	0.151271	0.113599	0.0750681	0.0607229	0.0482291	0.151734	0.0784325	0.128004	0.0672794	0.0363034	0.0761953	0.151964	0.0778355	0.128033	0.0669531	0.0321081	0.0758279
Paramicrosporidium saccamoebae	1246581	0.0180478	0.031386	0.0321992	0.00369144
Mitosporidium daphniae	1485682	0.0169352	0.0427108	0.0139304	0.00368985
Auxenochlorella protothecoides	3075	0.0448275	0.0285405	0.0093593	0.0138572
Bathycoccus prasinos	41875	0.0535522	0.0575235	0.0182736	0.0103974
Staphylococcus chromogenes	46126	0.444323	0.430863	0.288175	0.147187	0.414203	0.447365	0.470537	0.256258	0.141856	0.414128	0.512211	0.49183	0.245387	0.129171	0.369066	0.40906	0.508072	0.492163	0.243992	0.126259	0.365629	0.403067	0.224255	0.495652	0.483846	0.361133	0.122262	0.397677	0.496564	0.475377	0.256512	0.129949	0.356672	0.394117	0.490838	0.470397	0.255169	0.129653	0.353879	0.385295	0.477452	0.234757	0.458186	0.127669	0.347032	0.373807	0.460094	0.232816
Avian sarcoma virus	11876	0.0329156	0.0458249	0.0278809	0.0174212
Calothrix sp. PCC 7507	99598	0.0327298	0.0343183	0.00935927	0.01047
Burkholderia pseudomallei	28450	0.132783	0.169539	0.0755748	0.0492606	0.173373	0.151519	0.121739	0.0654739	0.0488842	0.174221	0.136033	0.182903	0.0725265	0.0310337	0.0748805	0.172818	0.13513	0.182949	0.0721746	0.0270478	0.0743481	0.171185	0.0699701	0.129776	0.18092	0.0737612	0.0209678
Debaryomyces fabryi	58627	0.175093	0.128205	0.11787	0.0388453	0.119018	0.183924	0.169002	0.0888746	0.0408464	0.124944	0.183452	0.195645	0.0803367	0.031178	0.145886	0.12144	0.182281	0.1957	0.0799814	0.0324609	0.145	0.120392	0.0686636	0.181318	0.193519	0.143783	0.0350833
Granulicatella elegans	137732	0.0181682	0.0319709	0.0187547	0.0107479
Tieghemostelium lacteum	361077	0.0774254	0.05431	0.0546298	0.0204579	0.052317	0.061235	0.0939175	0.0410877	0.0234897
Propionibacterium phage pa29399-1-D_1	2079402	0.0519469	0.0321642	0.000493641	0.000343396
Propionibacterium virus PHL111M01	1982284	0.0379796	0.0385375	0.00490116	0.00369045
Conidiobolus coronatus	34488	0.0599464	0.0371522	0.00487759	0.000343469
Feline leukemia virus	11768	0.0418602	0.0286177	0.00935902	0.00370846
Staphylococcus simulans	1286	1.85041	1.72689	0.779789	0.286223	1.65849	1.90393	1.93752	0.639914	0.272712	1.63613	2.3275	2.35256	0.585439	0.256529	1.12576	1.5846	2.28813	2.356	0.578669	0.251941	1.10527	1.5359	0.539692	2.18135	2.27925	1.07842	0.223	1.49423	2.20326	2.20498	0.642461	0.253886	1.04563	1.46702	2.15464	2.15827	0.635893	0.252933	1.0296	1.40019	2.04091	0.584364	2.04576	0.233034	0.990941	1.31526	1.89692	0.576777
Porphyra umbilicalis	2786	0.0358527	0.0457019	0.0274226	0.00704319
Spizellomyces punctatus	109760	0.0774948	0.075888	0.0506767	0.0242342	0.0838481	0.049902	0.103986	0.0412365	0.0239384
Propionibacterium virus Wizzo	1982308	0.063884	0.0447265	0.00490209	0.000342545
Candidatus Sulcia muelleri	336810	0.293414	0.283502	0.203297	0.129619	0.289914	0.280788	0.303089	0.203041	0.11578	0.287169	0.312921	0.297495	0.193394	0.120666	0.244426	0.283077	0.310915	0.297635	0.192218	0.119189	0.242684	0.279785	0.180585	0.301955	0.293814	0.240425	0.11876	0.276856	0.302868	0.289989	0.206827	0.116593	0.241567	0.274912	0.300244	0.287613	0.205777	0.116312	0.240096	0.27004	0.29356	0.186808	0.281925	0.119634	0.236601
Staphylococcus epidermidis	1282	0.434356	0.32988	0.32731	0.122938	0.312816	0.40923	0.49191	0.273661	0.11346	0.314765	0.554917	0.437849	0.292591	0.0887336	0.312028	0.310627	0.549769	0.438173	0.290388	0.0848968	0.309323	0.306619	0.282466	0.535075	0.430393	0.305774	0.0572926	0.302578	0.54225	0.423073	0.28465	0.102253	0.300422	0.300112	0.535265	0.418645	0.282833	0.101978	0.298229	0.293912	0.518364	0.301174	0.407643	0.0709675	0.293051
Human betaherpesvirus 6A	32603	0.0805916	0.0693847	0.0316411	0.000424224	0.0760764	0.0774714	0.0791938	0.0137524	0.00045925
Paenibacillus pinistramenti	1768003	0.0571193	0.0840312	0.0182733	0.0204584	0.0866703	0.0669951	0.0540952	0.00924931	0.0234897
Propionibacterium virus PHL070N00	1982279	0.05463	0.0262577	0.000494057	0.000343313
Aphanomyces invadans	157072	0.0325103	0.0288042	0.027302	0.00370993
Pyramidobacter sp. C12-8	1943580	0.555387	0.546551	0.318788	0.165022	0.539218	0.561103	0.568614	0.28725	0.156768	0.536181	0.620479	0.61654	0.274816	0.145196	0.444895	0.519027	0.614875	0.617002	0.27309	0.144341	0.440123	0.509891	0.254779	0.594141	0.605443	0.433885	0.134364	0.501896	0.595582	0.593732	0.288837	0.147467	0.431371	0.496609	0.587854	0.58663	0.287171	0.147053	0.427458	0.48357	0.569953	0.267486	0.568849	0.139907	0.417887	0.466577	0.546634	0.266242
Lingulodinium polyedra	160621	0.375791	0.299939	0.20535	0.0808471	0.303983	0.339089	0.378466	0.171742	0.0812024	0.299545	0.408397	0.36986	0.151873	0.0812559	0.288823	0.294702	0.405293	0.370065	0.151156	0.0783746	0.286463	0.291043	0.137164	0.401095	0.364732	0.283388	0.0771953	0.287753	0.399972	0.359316	0.171357	0.0691023	0.278071	0.285587	0.395927	0.356025	0.170521	0.0689644	0.276183	0.280171	0.38627	0.142212	0.347983	0.0840535	0.271582
Brucella abortus	235	0.130835	0.126145	0.0690257	0.0348666	0.119982	0.138882	0.132673	0.0461803	0.0402519	0.125892	0.143043	0.112649	0.0417448	0.0415892	0.154015	0.126347	0.142124	0.112672	0.0416059	0.0377526	0.153094
Moraxella osloensis	34062	0.228143	0.214025	0.106702	0.0493665	0.20034	0.238954	0.223876	0.107732	0.0357622	0.20454	0.241864	0.241363	0.0963032	0.0203644	0.224047	0.197966	0.240309	0.241448	0.0958271	0.0211897	0.222599	0.195945	0.0859817	0.236621	0.238578	0.220698	0.0138017	0.19411	0.235037	0.235757	0.107124	0.0190498	0.219709
Riemerella anatipestifer	34085	0.222988	0.210592	0.123814	0.0795907	0.204065	0.234444	0.213449	0.107773	0.0795401	0.206174	0.227097	0.244154	0.101391	0.0700065	0.211763	0.199654	0.225686	0.244248	0.100881	0.0728979	0.210375	0.197613	0.0944884	0.223835	0.241566	0.208428	0.0721531	0.195815	0.227833	0.238836	0.102759	0.0749883	0.19513	0.19457	0.225967	0.23718	0.102375	0.0748384	0.194108
Haemophilus parainfluenzae	729	0.0911402	0.0657038	0.037677	0.0214527	0.0571435	0.0807382	0.10173	0.0383598	0.0163063
Ceraceosorus guamensis	1522189	0.0970383	0.135631	0.0686585	0.0343349	0.141616	0.097964	0.104895	0.0593201	0.0356191	0.139006	0.110992	0.11141	0.0578337	0.0306859	0.0766969	0.135066	0.110163	0.111526	0.057561	0.031829	0.0763015
Eimeria maxima	5804	1.94278	2.545	0.789613	0.283942	2.63331	2.04183	2.00947	0.673836	0.265924	2.52502	2.37471	2.8137	0.625579	0.239651	1.13218	2.38479	2.3351	2.81879	0.618276	0.237161	1.11136	2.30728	0.551519	2.20749	2.72473	1.08462	0.217689	2.23426	2.23988	2.63057	0.682828	0.242923	1.0589	2.18989	2.18881	2.57338	0.675519	0.241965	1.04293	2.07779	2.07299	0.594936	2.4347	0.228605	1.00361	1.93671	1.92575	0.588132
Linnemannia elongata	310910	0.0355601	0.0662686	0.0227964	0.0209953
Propionibacterium virus PHL141N00	1982292	0.053443	0.0208441	0.00490197	0.000342849
Piromyces sp. E2	73868	0.0444559	0.0397939	0.05876	0.0207182	0.0406981	0.0326988	0.0739428	0.0452937	0.0160158
uncultured marine thaumarchaeote KM3_53_F08	1456186	0.605692	0.625355	0.311237	0.164645	0.608139	0.633146	0.607895	0.262062	0.16674	0.606886	0.680377	0.713138	0.246194	0.160994	0.466146	0.592768	0.673842	0.713755	0.244659	0.15851	0.460956	0.581436	0.24056	0.648054	0.698698	0.454287	0.141199	0.57149	0.655585	0.683261	0.262824	0.154282	0.447415	0.564866	0.646576	0.674288	0.261292	0.154163	0.443241	0.548642	0.625774	0.245645	0.651903	0.150569	0.433035	0.527659	0.598521	0.240774
Coprococcus comes	410072	0.098196	0.135178	0.074224	0.0105231	0.137952	0.10413	0.102678	0.0600968	0.0121468	0.134805	0.103264	0.122087	0.0502272	0.0206328	0.0627553	0.135364	0.10238	0.122149	0.0500074	0.0161356	0.0623572
Selenomonas sputigena	69823	0.0487897	0.120776	0.032284	0.00370841	0.139882	0.0588004	0.0400838	0.0275638	0.00429539
Candidatus Kryptonium thompsoni	1633631	0.0532553	0.0557497	0.0183539	0.0070432
Hesseltinella vesiculosa	101127	0.0181191	0.0400113	0.0318484	0.000424225
Colletotrichum higginsianum	80884	0.0506785	0.0455798	0.0364798	0.0172203
Gemmatimonadetes bacterium	2026742	0.0267809	0.0313006	0.00935902	0.0105411
Propionibacterium virus P100D	1982266	0.0462272	0.0382047	0.000494897	0.00368987
Alcanivorax nanhaiticus	1177154	0.179594	0.162047	0.126977	0.0491713	0.173234	0.164398	0.189499	0.0955038	0.0525521	0.174118	0.201082	0.164454	0.086187	0.0621649	0.136876	0.168874	0.199805	0.164479	0.0857836	0.0647105	0.136015	0.167278	0.076965	0.198483	0.162562	0.134799	0.0699461	0.165778	0.195836	0.160844	0.0956835	0.0577613	0.137219
Enterococcus faecium	1352	4.43894	4.64882	1.47615	0.416889	4.56554	4.58615	4.64871	1.15524	0.394916	4.48047	5.629	5.78516	1.03628	0.366892	2.59246	4.30933	5.52493	5.79242	1.02056	0.357879	2.53258	4.15387	0.909564	5.19724	5.58199	2.45365	0.320137	4.01048	5.2534	5.37002	1.16802	0.360776	2.37767	3.92254	5.11916	5.24491	1.15241	0.358949	2.3308	3.70115	4.81025	0.990926	4.93084	0.338151	2.2169	3.42058	4.41846	0.968613
Enterobacter cloacae complex sp. 743-2DZ2F-22B	2511985	0.255295	0.21557	0.113022	0.0633566	0.203742	0.249964	0.254304	0.0954869	0.0651293	0.205488	0.275941	0.248364	0.0900132	0.0523022	0.240935	0.198659	0.27424	0.248458	0.0895834	0.0544399	0.239172	0.196545	0.0849639	0.269141	0.245607	0.236892	0.048793	0.19465	0.267352	0.242755	0.0952756	0.0533639	0.237652	0.193353	0.26515	0.241009	0.0949321	0.0531495	0.236207
Thermus thermophilus	274	0.0685959	0.0116609	0.0367507	0.0205536
Coprinellus micaceus	71717	0.0330221	0.0314722	0.0228966	0.00374948
Achromobacter spanius	217203	0.539583	0.48977	0.343773	0.171663	0.479065	0.52959	0.569045	0.303963	0.165446	0.477532	0.625912	0.605158	0.284965	0.156825	0.406638	0.460008	0.620237	0.605647	0.283124	0.158032	0.402542	0.452521	0.262796	0.603637	0.594451	0.397194	0.150708	0.445966	0.6071	0.583215	0.303644	0.158442	0.3901	0.441618	0.599151	0.576305	0.301823	0.158036	0.386814	0.430923	0.580643	0.278524	0.55885	0.153206	0.378788	0.416882	0.556682	0.275259
Streptococcus intermedius	1338	0.878691	0.885778	0.47275	0.203259	0.885168	0.872118	0.924738	0.417713	0.191232	0.851786	1.04057	1.12648	0.39516	0.174984	0.571086	0.826301	1.02735	1.12762	0.39188	0.172324	0.563851	0.807085	0.360055	0.975445	1.0988	0.554251	0.157831	0.790377	0.992749	1.06981	0.422844	0.176776	0.548259	0.779332	0.975699	1.05232	0.419563	0.176242	0.542415	0.752349	0.936414	0.377116	1.00894	0.167999	0.528173	0.717621	0.886163	0.371708
Pseudomonas sp. MWU13-2860	2071714	0.0537059	0.0488855	0.0183539	0.0137513
Nitrospirales bacterium LBB_01	2552947	0.24972	0.266282	0.137553	0.0716888	0.255897	0.286955	0.226033	0.125253	0.0658996	0.256952	0.259606	0.305761	0.12141	0.0525097	0.196729	0.24809	0.257784	0.305905	0.120848	0.0546669	0.195376	0.245309	0.11028	0.2558	0.302169	0.193638	0.0499974	0.242889	0.260588	0.298379	0.124669	0.0587792	0.181381	0.241213	0.258461	0.296088	0.124201	0.0586001	0.180333
Podila verticillata	78898	0.0327298	0.034647	0.0365709	0.0137513
Propionibacterium phage Enoki	1654780	0.0407002	0.0323622	0.00049854	0.00034497
Nadsonia fulvescens	45786	0.0450279	0.0643235	0.0553452	0.0241169	0.0731398	0.0409197	0.0452632	0.0603289	0.0197854
Laccaria amethystina	89243	0.0804641	0.130886	0.0705197	0.0305116	0.149221	0.0777207	0.0854085	0.0553363	0.0354739	0.149721	0.0838643	0.0856146	0.0539943	0.0349322	0.0649532
Pelagibacterium lacus	2282655	0.337032	0.305779	0.243523	0.13474	0.295919	0.354122	0.326629	0.229053	0.125382	0.293366	0.359429	0.393055	0.219771	0.120838	0.248409	0.290127	0.35697	0.393253	0.218589	0.118699	0.246529	0.28672	0.206358	0.350786	0.387746	0.244112	0.110185	0.2836	0.350581	0.382076	0.227415	0.123219	0.242926	0.28157	0.347319	0.378677	0.226297	0.122898	0.241391	0.276468	0.339543	0.21203	0.37034	0.119313	0.237655	0.269785	0.329561	0.209301
Coniella lustricola	2025994	0.168821	0.178174	0.112923	0.0605655	0.177149	0.157314	0.185384	0.102942	0.061383	0.177924	0.204191	0.166983	0.0974343	0.0577145	0.123189	0.172602	0.202873	0.167006	0.0969481	0.0600948	0.12245	0.170943	0.0865426	0.201071	0.16519	0.121423	0.0640478	0.169454	0.197804	0.163496	0.103157	0.0586638	0.125642
Drechmeria coniospora	98403	0.0506036	0.0494794	0.0183541	0.00704319
Levilactobacillus brevis	1580	15.4988	20.8442	6.50711	0.870084	21.4967	16.8564	15.6284	5.29984	0.771385	20.4438	18.5175	25.195	4.70409	0.645951	7.94229	19.4613	18.145	25.2382	4.59963	0.626218	7.72997	18.6752	3.83907	16.9397	24.2475	7.45368	0.511359	17.9732	17.2545	23.259	5.48924	0.659435	7.14151	17.5306	16.7859	22.6681	5.38815	0.653749	6.97805	16.4321	15.699	4.31008	21.206	0.576768	6.58257	15.0501	14.322	4.17574
Jimgerdemannia flammicorona	994334	25.5833	39.2027	7.88188	0.964298	41.164	28.4412	25.6669	6.19795	0.837351	39.0292	31.3358	43.2643	5.40847	0.692732	11.3946	36.7457	30.7024	43.3406	5.28673	0.672731	11.0832	35.2471	4.27459	28.5568	41.6268	10.6797	0.561712	33.9017	29.2178	39.9151	6.37911	0.70557	10.2622	33.0564	28.4144	38.8907	6.26119	0.699426	10.0214	30.9595	26.552	4.88602	36.3609	0.625883	9.44075	28.3198	24.1878	4.70136
Coccomyxa subellipsoidea	248742	0.0329031	0.0428564	0.0230139	0.0138478
Neospora caninum	29176	0.0358653	0.0258154	0.0321237	0.0204582
Pectobacterium carotovorum	554	0.455881	0.431292	0.270282	0.152088	0.41869	0.459598	0.475706	0.238893	0.147082	0.416751	0.526504	0.51011	0.229281	0.137623	0.352769	0.409663	0.522182	0.510445	0.228054	0.135507	0.349599	0.403552	0.216672	0.510697	0.501865	0.345447	0.124943	0.398083	0.51112	0.493087	0.240447	0.137061	0.341352	0.39447	0.505125	0.487894	0.23923	0.1367	0.338772	0.385522	0.491154	0.227691	0.47502	0.129243	0.332441	0.373854	0.472988	0.227536
Leishmania mexicana	5665	0.0385928	0.0457005	0.027579	0.00377719
Plasmodium inui	52288	0.303793	0.315044	0.217918	0.105875	0.308537	0.304677	0.313161	0.21259	0.0949041	0.306672	0.338447	0.3314	0.209596	0.0782358	0.248396	0.299878	0.33619	0.331575	0.20853	0.0759644	0.246517	0.296245	0.189165	0.329855	0.327146	0.244106	0.0730787	0.292978	0.330927	0.322747	0.212971	0.0854219	0.241616	0.290811	0.327975	0.320065	0.212003	0.0852442	0.240091	0.285456	0.320755	0.204441	0.313364	0.0732108	0.23642	0.278367	0.311617	0.201979
Staphylococcus capitis	29388	8.07544	11.8912	2.70199	0.544787	12.3919	9.22813	7.85988	2.09301	0.507739	11.9674	9.43066	12.9009	1.85331	0.447202	4.51061	11.2764	9.24841	12.9218	1.81826	0.439235	4.39449	10.8291	1.59351	8.5754	12.4229	4.24627	0.376872	10.4314	8.78132	11.9274	2.15081	0.446839	4.08333	10.1796	8.55048	11.6317	2.11704	0.44429	3.99431	9.55575	8.0126	1.75555	10.8972	0.407463	3.78087	8.76992	7.33234	1.70993
Propionibacterium virus SKKY	1982305	0.042948	0.0378032	0.00049614	0.000344982
Bodo saltans	75058	0.0386862	0.031652	0.0227714	0.00379023
Saprolegnia parasitica	101203	0.047388	0.0462336	0.00487147	0.0103973
Brachyspira sp. CAG:700	1262760	0.041821	0.0371152	0.00940053	0.0070432
Plasmopara halstedii	4781	0.0354676	0.0204301	0.0230296	0.0070432
Bacillus sp. BA3	2057910	1.53696	1.3321	0.695446	0.269868	1.29413	1.49371	1.6204	0.59724	0.254832	1.26002	1.84487	1.90378	0.56461	0.232227	0.995678	1.2009	1.81531	1.90696	0.55861	0.231934	0.978549	1.1683	0.501667	1.71226	1.84778	0.956006	0.216346	1.13863	1.7371	1.79013	0.603007	0.239555	0.939309	1.12027	1.70069	1.75399	0.596985	0.238622	0.92563	1.07402	1.61631	0.535107	1.66743	0.225845	0.892499	1.01523	1.50939	0.523653
Propionibacterium phage PA1-14	1747271	0.0657688	0.0660736	0.000493236	0.000343035
Streptomyces scabiei	1930	0.106856	0.0993686	0.0702457	0.0418531	0.102199	0.105748	0.0905438	0.080717	0.0358479	0.0998226	0.0902107	0.123556	0.0766306	0.0414499	0.0633686
Rhizopus delemar	936053	0.044646	0.0399949	0.0271842	0.00704319
Planctopirus hydrillae	1841610	0.838637	0.791989	0.437058	0.19771	0.769711	0.862865	0.857422	0.358504	0.198812	0.764201	0.970563	1.02025	0.336777	0.186624	0.605409	0.745542	0.95919	1.0212	0.334224	0.183716	0.597398	0.729136	0.317461	0.922179	0.996239	0.587049	0.167077	0.714956	0.926678	0.970815	0.359574	0.184693	0.578378	0.705457	0.911469	0.955778	0.357045	0.184158	0.571938	0.682339	0.87602	0.332208	0.918204	0.175109	0.556351	0.652542	0.830418	0.329478
Cronobacter sakazakii	28141	9.35061	10.1819	2.54182	0.499207	10.16	9.47993	9.97322	1.89828	0.459651	9.98381	12.3806	12.7295	1.6824	0.40395	4.47808	9.4453	12.1445	12.7497	1.6516	0.39552	4.36482	9.07598	1.38631	11.3486	12.2588	4.21706	0.35112	8.74331	11.5364	11.7702	1.93123	0.406214	4.09376	8.5343	11.2283	11.4783	1.90197	0.403859	4.0046	8.01624	10.5118	1.56241	10.7541	0.37437	3.79045	7.3639	9.60519	1.51881
Streptomyces sp. MH60	1940758	0.521177	0.488002	0.342604	0.158531	0.484124	0.517871	0.533072	0.305151	0.150794	0.482483	0.585299	0.573151	0.287932	0.135489	0.43675	0.468777	0.580186	0.573577	0.286053	0.134259	0.432129	0.461112	0.266762	0.566634	0.563239	0.42609	0.119703	0.454361	0.566934	0.552753	0.306826	0.137352	0.417578	0.449888	0.559832	0.54644	0.304974	0.137033	0.413892	0.438853	0.543192	0.282553	0.530623	0.127614	0.404901	0.424449	0.521767	0.279935
Cryptosporangium arvum	80871	0.0169759	0.0424787	0.0273033	0.0137513
Plasmodium yoelii	5861	0.719026	0.838625	0.416088	0.199903	0.848432	0.742417	0.739547	0.367494	0.193132	0.827027	0.833675	0.90883	0.345897	0.182358	0.501227	0.799336	0.824694	0.909667	0.343271	0.180598	0.495427	0.781097	0.316993	0.794292	0.888567	0.487723	0.171355	0.765145	0.797772	0.867206	0.367439	0.182901	0.483838	0.7547	0.785473	0.854407	0.364864	0.182346	0.479109	0.729039	0.757072	0.338002	0.822512	0.17398	0.467575	0.695983	0.720642	0.334255
Photobacterium chitinilyticum	2485123	125.685	69.24	76.4227	6.42837	65.9373	98.4505	156.99	57.478	5.59589	64.192	182.995	120.823	52.6949	3.96748	93.2432	61.8031	179.267	121.03	51.3963	3.84427	90.5842	59.261	38.3263	168.032	116.215	87.1225	3.31765	56.9904	170.252	111.389	58.9092	4.50204	82.3995	55.5601	165.52	108.513	57.7407	4.43556	80.3767	52.0117	154.497	46.7583	101.408	3.46345	75.5082	47.542	140.554	44.0664
Ralstonia solanacearum	305	0.242586	0.242825	0.137855	0.0882656	0.24495	0.233173	0.244977	0.132551	0.0815215	0.244468	0.265914	0.262608	0.130649	0.0704659	0.170277	0.241857	0.264304	0.262715	0.130053	0.0673271	0.169226	0.239369	0.115983	0.260553	0.259507	0.167795	0.0722216	0.237016	0.260651	0.25646	0.134217	0.0706352	0.168131	0.235513	0.258645	0.254511	0.133643	0.0704909	0.167216	0.231717	0.253678	0.123069	0.249826	0.0718619	0.165063
Citrobacter freundii	546	0.921355	0.909152	0.472643	0.225456	0.879567	0.932164	0.981109	0.419605	0.213412	0.874269	1.14629	1.07062	0.396521	0.200812	0.638497	0.860296	1.1316	1.07158	0.393147	0.196132	0.629812	0.839717	0.365884	1.0863	1.04499	0.618421	0.180729	0.822344	1.10331	1.0172	0.418466	0.200831	0.599875	0.810389	1.08368	1.00144	0.415208	0.200136	0.593075	0.781758	1.03802	0.389438	0.961576	0.186945	0.57658	0.744905	0.979608	0.384124
Butyrivibrio sp. XB500-5	2364880	0.29534	0.249135	0.0611683	0.024682	0.241197	0.272289	0.32326	0.0367895	0.0163874	0.246187	0.357054	0.25648	0.0334182	0.00551176	0.255034	0.23639	0.354561	0.25657	0.0326742	0.00567303	0.252982	0.233402	0.0254385	0.344265	0.252929	0.25034	0.00736369
Prevotella sp. P3-120	2024220	1.16511	1.08961	0.598595	0.25063	1.06662	1.16241	1.19699	0.525355	0.238736	1.03871	1.34176	1.46572	0.497646	0.220402	0.790844	0.998368	1.32243	1.4676	0.492817	0.219316	0.778683	0.97303	0.448907	1.25316	1.42567	0.762648	0.204582	0.950595	1.27359	1.38491	0.530993	0.225182	0.747182	0.93622	1.24924	1.35931	0.526127	0.224369	0.737566	0.900625	1.19347	0.477713	1.29709	0.212068	0.714171	0.85505	1.12237	0.468277
Guillardia theta	55529	0.0995181	0.0927115	0.0581867	0.0240359	0.0831723	0.112248	0.0895769	0.0578373	0.0198207	0.0890929	0.089407	0.11391	0.0560764	0.0154374	0.0858043
Tilletiaria anomala	5281	0.0391142	0.0402307	0.0460597	0.0104647
Trichomonas vaginalis	5722	0.0269921	0.0258869	0.0183542	0.0104706
Capronia epimyces	43228	0.0385928	0.0200298	0.0182737	0.0103977
Staphylococcus pseudintermedius	283734	44.8508	64.9604	13.7334	1.58854	67.6809	51.1395	43.5933	10.0845	1.43155	65.2149	52.587	72.5245	8.62882	1.20144	23.6836	61.469	51.5243	72.652	8.42527	1.1655	23.0243	58.9408	7.07213	47.6166	69.7669	22.1678	0.937047	56.6898	48.8833	66.8837	10.3513	1.18553	21.1694	55.2654	47.5359	65.1624	10.1532	1.17293	20.6588	51.7377	44.3934	8.04997	60.9072	1.03496	19.4329	47.2975	40.4194	7.83742
Thermus scotoductus	37636	0.192751	0.157275	0.111358	0.0492758	0.142432	0.209323	0.185032	0.099827	0.0406417	0.144096	0.183188	0.224919	0.0899443	0.0419556	0.173277	0.139869	0.181955	0.224993	0.0895143	0.0436719	0.172185	0.138562	0.0765901	0.181351	0.222476	0.170675	0.0496953	0.137348	0.176351	0.219981	0.094662	0.043961	0.173318
Xenorhabdus ehlersii	290111	0.0821809	0.10106	0.0370751	0.0137969	0.106151	0.0747322	0.0917665	0.036742	0.00812954	0.0995263	0.0905793	0.110326	0.0290891	0.000600305	0.053995
Eimeria mitis	44415	0.0752074	0.0807194	0.0227287	0.0137976	0.0789179	0.074753	0.0791937	0.0182454	0.0119832
Bipolaris zeicola	5017	0.0356613	0.0458249	0.0138787	0.0105648
Naegleria gruberi	5762	0.0802402	0.0788453	0.0588812	0.0104961	0.0802943	0.0697312	0.0939176	0.0454225	0.0120543
Methylocystis bryophila	655015	0.0663579	0.103454	0.0410267	0.0105365	0.125268	0.053539	0.0694495	0.036797	0.00814524
Exidia glandulosa	5219	0.0327338	0.0286172	0.0185401	0.0104203
Acidobacteria bacterium	1978231	0.164646	0.161117	0.0762152	0.0380221	0.152987	0.187589	0.137533	0.0664742	0.0398887	0.154426	0.16186	0.173312	0.0595269	0.0360429	0.162897	0.154099	0.16082	0.173355	0.0592926	0.0320066	0.161875	0.152626	0.0548687	0.161315	0.171411	0.160436	0.0273364
Puccinia coronata	27344	0.056664	0.0928984	0.0229285	0.0104669	0.0914838	0.0701923	0.0589789	0.0184877	0.00812954
Tyzzerella nexilis	29361	0.0138309	0.0210285	0.0182738	0.0275099
Fibularhizoctonia sp. CBS 109695	436010	0.11989	0.130006	0.0819454	0.0409441	0.135199	0.113646	0.133175	0.0629259	0.0433855	0.132933	0.136594	0.116031	0.0529125	0.0353536	0.152581	0.129137	0.135685	0.116159	0.0526743	0.0367514	0.151661
Staphylococcus haemolyticus	1283	0.0632135	0.0538648	0.0283789	0.0105201
Terfezia boudieri	82571	0.121562	0.134654	0.0786603	0.0378211	0.149595	0.125142	0.0951515	0.0834669	0.0316937	0.146168	0.0999572	0.125327	0.0844012	0.0302747	0.100195	0.145733	0.099152	0.125266	0.0840159	0.026358	0.0995256
Moramonas marocensis	1805496	0.0956768	0.0841925	0.0696224	0.0316122	0.0922988	0.082799	0.103708	0.0503743	0.036546	0.0902628	0.109932	0.0802989	0.0414316	0.0365139	0.108073
Streptococcus sanguinis	1305	0.560203	0.609848	0.337577	0.183114	0.611125	0.578068	0.57143	0.308003	0.174312	0.597811	0.617394	0.699894	0.295637	0.163389	0.415609	0.58363	0.611846	0.700471	0.293633	0.161181	0.411379	0.572607	0.275313	0.596632	0.686209	0.405837	0.14978	0.5629	0.593864	0.671542	0.311191	0.163945	0.40353	0.556444	0.586191	0.663029	0.309242	0.163513	0.40006	0.540647	0.568337	0.285991	0.641688	0.157815	0.391572	0.520167	0.545217	0.281342
Bacillus dafuensis	1742359	0.107209	0.125539	0.0647017	0.0487254	0.13331	0.101386	0.120534	0.0511048	0.0481445	0.130269	0.123147	0.111546	0.0461297	0.0459207	0.110459	0.126461	0.122279	0.111475	0.0459486	0.0478097	0.109765
Plasmodium malariae	5858	1.43571	1.8799	0.713829	0.282594	1.93666	1.5404	1.42436	0.628272	0.269005	1.85546	1.63411	2.07709	0.585887	0.248034	0.925512	1.78095	1.60883	2.08013	0.579518	0.244376	0.910095	1.72619	0.522967	1.52572	2.01443	0.889938	0.227283	1.6759	1.54527	1.95032	0.639821	0.24799	0.870496	1.64484	1.51319	1.91045	0.633298	0.247074	0.858469	1.56687	1.44108	0.559357	1.81377	0.236196	0.828953	1.46839	1.34896	0.552244
Chlorella sorokiniana	3076	0.0503211	0.0376308	0.0275949	0.017373
Psychrobacillus sp. FJAT-21963	1712028	10.3391	16.2693	3.049	0.609524	16.9074	12.3402	9.74948	2.3408	0.56607	16.3582	11.7818	16.9319	2.04535	0.516003	5.52276	15.5438	11.5516	16.9609	2.00595	0.501139	5.3788	14.9205	1.75158	10.6582	16.3047	5.19246	0.435639	14.3653	10.9934	15.6467	2.38588	0.505408	4.96229	14.0143	10.7006	15.2544	2.347	0.50235	4.85221	13.1435	10.0196	1.9568	14.2807	0.459614	4.58687	12.047	9.15764	1.92513
Acidiplasma cupricumulans	312540	0.821629	0.809285	0.448685	0.219289	0.801152	0.815735	0.859995	0.384256	0.215817	0.795586	0.979491	0.944933	0.362301	0.205559	0.592836	0.774268	0.968002	0.945788	0.359435	0.203293	0.58513	0.756846	0.337091	0.931667	0.923451	0.575074	0.191182	0.74181	0.942963	0.900584	0.38512	0.204267	0.559755	0.73176	0.927319	0.887161	0.382326	0.203638	0.553681	0.70728	0.890927	0.354317	0.853546	0.19624	0.538943	0.675743	0.844196	0.350634
Priestia megaterium	1404	0.282936	0.23424	0.174774	0.0887434	0.221988	0.29028	0.282485	0.148767	0.0854342	0.223418	0.30794	0.296654	0.141882	0.0767724	0.247004	0.220308	0.306028	0.296792	0.141225	0.0743866	0.245238	0.218066	0.133699	0.301712	0.293231	0.242813	0.0655763	0.215967	0.300072	0.289667	0.148036	0.0763567	0.241651	0.214617	0.297412	0.287485	0.14743	0.0762013	0.240255	0.211216	0.29177	0.139079	0.282075	0.0723498	0.236275
Propionibacterium virus P104A	1982268	0.0460283	0.0351348	0.000498562	0.000343558
Caenispirillum salinarum	859058	0.0327285	0.0173954	0.0231158	0.0105232
Streptomyces sp. WAC 01325	2203202	0.195951	0.211044	0.161813	0.0611384	0.206327	0.189911	0.227151	0.14301	0.0569799	0.20548	0.247468	0.208107	0.134285	0.0465636	0.149246	0.199019	0.246038	0.208158	0.13361	0.048435	0.148312	0.197	0.128175	0.241235	0.205831	0.147004	0.0338325	0.195197	0.242246	0.203587	0.143897	0.048479	0.148642	0.193958	0.240394	0.202141	0.143326	0.0481846	0.147837
Serendipita vermifera	109899	0.0387142	0.0395735	0.00940051	0.01382
Vibrio parahaemolyticus	670	0.260635	0.251486	0.147831	0.0990896	0.239723	0.269769	0.268596	0.128256	0.0976539	0.245797	0.288342	0.262327	0.123935	0.0862722	0.267321	0.244194	0.286396	0.262434	0.123352	0.0829944	0.265385	0.241629	0.117839	0.283945	0.259232	0.262846	0.0765436	0.23919	0.28273	0.256182	0.127853	0.0840958	0.256842	0.237652	0.280339	0.254217	0.127298	0.0839129	0.2553	0.233708	0.274634	0.116592	0.249587	0.0889422	0.251428
Candidatus Nephrothrix sp. EaCA	2044729	0.0355601	0.028664	0.0138177	0.00711041
Globisporangium splendens	82926	0.0635823	0.0433682	0.0276042	0.0206686	0.0495607	0.0535948	0.0647852	0.0185492	0.0200045
Geovibrio thiophilus	139438	0.0972041	0.178083	0.060265	0.0175801	0.189809	0.11923	0.0852224	0.0664525	0.00812954	0.190236	0.089294	0.136119	0.0642253	0.0054371	0.0543421	0.18412	0.0884171	0.136018	0.063907	0.00558596	0.0541795
Blyttiomyces helicus	388810	0.0635609	0.0659171	0.0138171	0.0242478	0.0675373	0.0490614	0.0862755	0.00485938	0.0240262
Paenibacillus sp. Soil750	1736398	0.600321	0.55928	0.338862	0.159798	0.543591	0.587583	0.646131	0.299176	0.150783	0.538444	0.713074	0.668053	0.285449	0.135701	0.460991	0.524082	0.706025	0.668593	0.283594	0.133788	0.455926	0.514818	0.263647	0.67875	0.655406	0.449252	0.12085	0.506705	0.683527	0.642031	0.299883	0.138473	0.446566	0.501324	0.673904	0.633965	0.298097	0.138102	0.442413	0.48807	0.65159	0.275468	0.613897	0.129829	0.432277	0.470826	0.622697	0.271746
Bacillus safensis	561879	0.84949	0.800239	0.473271	0.217526	0.784066	0.840022	0.890026	0.421984	0.206934	0.767356	0.9831	1.02483	0.398078	0.192589	0.615947	0.740654	0.971345	1.02585	0.394724	0.191785	0.607741	0.724449	0.361511	0.930294	1.00056	0.596814	0.180847	0.710225	0.938138	0.975635	0.423815	0.195511	0.587897	0.700947	0.92248	0.960126	0.420504	0.194879	0.581318	0.678086	0.886351	0.384395	0.921872	0.185952	0.565313	0.648575	0.840029	0.37832
Clostridiales bacterium	1898207	0.0655141	0.0817522	0.0500821	0.0174389	0.0799281	0.0828687	0.0543465	0.0410579	0.0200775
Pterula gracilis	1884261	0.204642	0.20706	0.0646554	0.0495491	0.219192	0.189783	0.186317	0.059958	0.0532523	0.209571	0.190702	0.208506	0.0640031	0.0460874	0.170432	0.206869	0.189447	0.208563	0.0637564	0.0426453	0.169333	0.204766	0.0547675	0.188209	0.206167	0.167887	0.0481962	0.202719	0.183774	0.203964	0.059828	0.0489135	0.170575
Phanerochaete carnosa	231932	0.03273	0.0228694	0.0183539	0.00706672
Madurella mycetomatis	100816	0.0563466	0.0228584	0.000811776	0.00368985
Halorubrum sp. SS5	2518118	0.0698851	0.0638531	0.0457643	0.00709249	0.0571682	0.0712871	0.0793805	0.0321838	0.00816366
Acinetobacter sp. KU 011TH	2083752	0.49481	0.47658	0.259607	0.136553	0.46173	0.497543	0.520186	0.223008	0.133505	0.454514	0.563998	0.564052	0.217588	0.118735	0.395248	0.445676	0.559207	0.564444	0.216418	0.116197	0.39136	0.438577	0.197948	0.541558	0.554355	0.386273	0.116614	0.432269	0.542633	0.544035	0.224541	0.121002	0.385038	0.428094	0.535993	0.537899	0.223428	0.120695	0.381838	0.417776	0.520617	0.209209	0.522676	0.117122	0.373981	0.404348	0.500535	0.206553
Neisseria elongata	495	0.238325	0.230828	0.183166	0.102816	0.219291	0.258393	0.23095	0.175388	0.09541	0.219599	0.265929	0.267357	0.166765	0.0884674	0.196153	0.218009	0.26428	0.26747	0.165954	0.0857425	0.194843	0.2158	0.15454	0.260459	0.264195	0.193087	0.0806666	0.213668	0.259233	0.260998	0.175741	0.0866861	0.193644	0.21234	0.257188	0.258981	0.174971	0.0865121	0.192527	0.208942	0.252148	0.161482	0.254194	0.085297	0.189832
Streptococcus sp. WM07	2558284	0.528288	0.506254	0.358426	0.178723	0.504998	0.520762	0.553581	0.311187	0.176641	0.498395	0.61397	0.598122	0.299355	0.165653	0.390812	0.482745	0.608467	0.598576	0.297264	0.165961	0.387014	0.474676	0.278719	0.593425	0.587547	0.381996	0.15393	0.467583	0.594777	0.576377	0.312654	0.170028	0.376806	0.462886	0.587099	0.569626	0.310637	0.169548	0.373724	0.451321	0.56913	0.292338	0.552652	0.160325	0.366213	0.436193	0.546003	0.287706
Aspergillus rambellii	308745	0.476553	0.47405	0.278569	0.121152	0.454657	0.507608	0.466942	0.248439	0.11319	0.457844	0.518771	0.53224	0.222587	0.107807	0.415117	0.446982	0.514584	0.532597	0.221382	0.105331	0.410871	0.439839	0.199262	0.499548	0.523328	0.405369	0.105702	0.43349	0.506203	0.513878	0.245584	0.0992185	0.393033	0.429289	0.500273	0.508266	0.244351	0.0990432	0.389707	0.418923	0.486535	0.207265	0.494253	0.112757	0.381546	0.405413	0.468541	0.204738
Hondaea fermentalgiana	2315210	0.0685215	0.087566	0.0228282	0.0204583	0.103529	0.06922	0.0499529	0.0273115	0.0157845
Neisseria subflava	28449	0.362841	0.313108	0.251781	0.126876	0.306889	0.357683	0.360346	0.224825	0.125941	0.306363	0.384809	0.394907	0.214955	0.118601	0.288109	0.300725	0.382176	0.395134	0.213793	0.117414	0.285805	0.297072	0.205644	0.375751	0.389556	0.282741	0.102491	0.293789	0.374947	0.383883	0.224775	0.120607	0.280179	0.291618	0.37138	0.380452	0.223629	0.120315	0.278298	0.286215	0.363076	0.212775	0.3719	0.111489	0.273599	0.279108	0.352204	0.212286
Rhizophagus irregularis	588596	8.76939	12.8878	3.10662	0.584059	13.4705	9.91551	8.5524	2.46335	0.537954	12.9043	10.2864	14.6744	2.1719	0.478254	4.23179	12.0894	10.0876	14.6999	2.12927	0.472746	4.12444	11.6093	1.82588	9.37473	14.1333	3.98577	0.409634	11.1818	9.60227	13.563	2.52759	0.48271	3.83925	10.9112	9.34802	13.2256	2.48616	0.479603	3.75675	10.2403	8.75647	2.02609	12.387	0.442174	3.55714	9.39513	8.00839	1.97062
Aphanomyces astaci	112090	0.127298	0.148374	0.0929621	0.034556	0.160723	0.114527	0.142385	0.0743074	0.0359943	0.153239	0.145996	0.130428	0.0625605	0.025546	0.146781	0.148693	0.145117	0.130482	0.062327	0.0265915	0.145877	0.147306	0.0541647	0.145858	0.129088	0.14461	0.0269768
Tolypothrix sp. PCC 7601	1188	0.0297121	0.017187	0.0182736	0.013752
Paeniglutamicibacter antarcticus	494023	0.558475	0.501625	0.31953	0.150064	0.48294	0.557821	0.583596	0.283754	0.140455	0.480432	0.646367	0.61434	0.271982	0.128351	0.407476	0.47852	0.640405	0.614798	0.270274	0.123858	0.403365	0.470697	0.251034	0.623689	0.603069	0.398028	0.109191	0.463694	0.622429	0.59088	0.286642	0.128469	0.395335	0.45903	0.614138	0.583964	0.28496	0.128123	0.391974	0.447545	0.594972	0.265398	0.566985	0.118135	0.383719	0.432694	0.569926	0.261753
Idiomarina abyssalis	86102	5.79457	8.49282	1.83349	0.433472	8.98536	6.49934	5.64608	1.42605	0.405728	8.72001	6.8245	9.09589	1.27648	0.356961	3.12812	8.09624	6.69584	9.10955	1.25567	0.354864	3.05245	7.7819	1.10618	6.26247	8.76626	2.95452	0.309195	7.50003	6.37078	8.42465	1.43205	0.365814	2.85085	7.32163	6.20694	8.21611	1.41226	0.364022	2.79211	6.88142	5.82453	1.21502	7.70653	0.332435	2.6509	6.32683	5.34216	1.19014
Pasteurella multocida	747	0.957892	1.02624	0.463399	0.212936	1.03302	0.970911	0.992686	0.392594	0.206505	1.01977	1.15248	1.11016	0.373148	0.188922	0.708429	0.984821	1.1378	1.11127	0.37011	0.18615	0.698124	0.959736	0.34957	1.09483	1.08311	0.684744	0.165893	0.937984	1.09521	1.0545	0.393936	0.190714	0.673918	0.923719	1.07593	1.03746	0.391008	0.190056	0.665631	0.888751	1.03073	0.367763	0.995044	0.176234	0.6457	0.843954	0.97283	0.362711
Stemphylium lycopersici	183478	0.0539692	0.0717274	0.0636398	0.0275826	0.0825043	0.0533633	0.0596691	0.0594507	0.0198682
Pseudogymnoascus sp. VKM F-4520 (FW-2644)	1420915	20.6829	32.5494	6.17255	0.909806	33.9578	24.4266	19.8128	4.5937	0.833592	32.7963	24.0185	34.0446	4.02414	0.718478	11.0356	31.0086	23.5364	34.1029	3.937	0.697075	10.7334	29.7482	3.35433	21.7614	32.7581	10.3447	0.581791	28.6168	22.3988	31.4168	4.70297	0.717919	9.84041	27.9049	21.786	30.616	4.61814	0.711902	9.61031	26.1399	20.3657	3.77132	28.6329	0.634558	9.05581	23.917	18.569	3.67491
Batrachochytrium salamandrivorans	1357716	0.0847118	0.0782763	0.0551145	0.0172508	0.0763153	0.0776191	0.0912795	0.0505091	0.0159051	0.0743616	0.102273	0.0961994	0.0498233	0.0154023	0.0215602
Bacillus anthracis	1392	0.175471	0.158619	0.0814017	0.0485649	0.158379	0.168358	0.186816	0.0655867	0.043913	0.154791	0.205164	0.198882	0.0589331	0.0463483	0.0970576	0.15016	0.203875	0.198927	0.0587013	0.0482032	0.0964329	0.148734	0.0577392	0.202046	0.196724	0.0956531	0.0417681
Tritrichomonas foetus	1144522	0.257641	0.312702	0.163642	0.0939102	0.323927	0.254191	0.253372	0.173887	0.0845483	0.318738	0.263594	0.277083	0.166854	0.0744047	0.224299	0.313697	0.2623	0.277205	0.165747	0.0713112	0.222718	0.309825	0.157853	0.250041	0.273774	0.220548	0.063479	0.306328	0.254928	0.270437	0.174276	0.0743654	0.222628	0.304025	0.252874	0.26834	0.17344	0.0742111	0.221264	0.298283	0.24792	0.165319	0.263315	0.0644497	0.2179
Morchella conica	5194	0.0268637	0.0199744	0.0273685	0.0138675
Rickettsia argasii	1441385	0.0974552	0.0727749	0.0182736	0.0070432	0.0728946	0.0907003	0.0908359	0.00924611	0.00809844
Paraburkholderia ginsengiterrae	1462993	1.03455	1.20829	0.476882	0.210933	1.23475	1.11652	1.00519	0.408353	0.202062	1.21279	1.14372	1.31344	0.380017	0.186191	0.793816	1.15636	1.12866	1.31494	0.376913	0.184466	0.781478	1.12532	0.350424	1.07508	1.279	0.765528	0.169484	1.09731	1.08567	1.24374	0.408612	0.186396	0.749804	1.07984	1.06663	1.22175	0.405561	0.18592	0.739934	1.03593	1.02192	0.372573	1.16794	0.175742	0.716342	0.980123	0.964846	0.368217
Nakamurella sp. s14-144	1902245	0.489577	0.584583	0.311209	0.158804	0.611809	0.492771	0.500591	0.285256	0.150324	0.59043	0.549382	0.591672	0.278951	0.134382	0.355026	0.576352	0.54478	0.592096	0.277125	0.1316	0.351808	0.565514	0.254329	0.528036	0.58115	0.347532	0.124981	0.555982	0.531577	0.569922	0.287711	0.138633	0.345209	0.549668	0.525202	0.563318	0.286015	0.138246	0.342564	0.534165	0.510133	0.262974	0.546927	0.134712	0.336142	0.51407	0.490833	0.259549
Haemophilus influenzae	727	1.48005	1.48557	0.728046	0.254417	1.50728	1.56456	1.37573	0.638421	0.23846	1.45082	1.61081	1.79317	0.586109	0.21289	1.23919	1.4026	1.58599	1.79551	0.579721	0.208556	1.2156	1.36187	0.532258	1.50539	1.74099	1.1848	0.180729	1.32572	1.53828	1.68767	0.645093	0.214172	1.11733	1.3026	1.5067	1.65473	0.638409	0.213349	1.09971	1.24561	1.43471	0.565384	1.57404	0.197159	1.0571	1.17308	1.34308	0.554021
Nostoc punctiforme	272131	0.0890171	0.11736	0.0464838	0.0140996	0.109325	0.0966641	0.119845	0.0187221	0.0162435	0.106579	0.140631	0.138933	0.0126149	0.0104437	0.0219814
Torque teno virus	68887	0.184074	0.208257	0.153511	0.0595401	0.219682	0.209816	0.142568	0.190662	0.0449064	0.227534	0.138034	0.130296	0.181971	0.0449212	0.402048	0.218538	0.136698	0.130243	0.180507	0.0468861	0.397131	0.215785	0.165372	0.1306	0.128615	0.390693	0.0370048
uncultured SUP05 cluster bacterium	655186	0.0695359	0.069765	0.0274829	0.0208064	0.0724633	0.0537658	0.0858083	0.0183869	0.0240873
Chondrus crispus	2769	0.0475905	0.0397953	0.00935729	0.00704315
Plasmodium falciparum	5833	1.41246	1.29365	0.673189	0.257409	1.23619	1.43381	1.49016	0.566297	0.244753	1.2256	1.74397	1.73634	0.531994	0.22678	0.893857	1.19816	1.71653	1.73813	0.526307	0.221504	0.879171	1.16452	0.483806	1.64095	1.68638	0.860011	0.198018	1.13654	1.65451	1.63514	0.567961	0.228725	0.838729	1.11741	1.62109	1.60391	0.562567	0.227906	0.827103	1.07159	1.54162	0.515735	1.52647	0.210697	0.79916	1.01279	1.44127	0.503576
Euzebya pacifica	1608957	0.023914	0.039904	0.0182733	0.0037038
Campylobacter jejuni	197	0.520755	0.53218	0.374712	0.199669	0.528269	0.524081	0.553315	0.338478	0.191939	0.524639	0.616385	0.572521	0.321329	0.188145	0.405699	0.51659	0.610843	0.572953	0.319028	0.185553	0.401639	0.507615	0.302272	0.597356	0.562502	0.396329	0.172015	0.499678	0.600682	0.551767	0.339128	0.187044	0.386326	0.494389	0.59287	0.545553	0.3369	0.186488	0.383106	0.481393	0.57466	0.318237	0.530197	0.176704	0.37524	0.464558	0.551089	0.316174
Psychrobacter cibarius	282669	4.59029	6.22526	2.19172	0.467062	6.37385	4.98697	4.68815	1.86666	0.426662	6.0827	5.5044	7.38989	1.69918	0.377119	2.37793	5.82803	5.40275	7.39999	1.66771	0.367635	2.32337	5.60427	1.43125	5.05836	7.12127	2.25208	0.318197	5.40759	5.15791	6.84424	1.92243	0.383917	2.17346	5.28312	5.02817	6.68237	1.89329	0.381543	2.13105	4.97541	4.72409	1.58284	6.27267	0.345972	2.02939	4.5843	4.34051	1.53846
Gemella haemolysans	1379	0.0396634	0.0603499	0.0373124	0.014065
Trichococcus pasteurii	43064	0.0475908	0.0575029	0.107463	0.0582937	0.0599917	0.0527493	0.0401101	0.136307	0.0412023	0.0589819	0.0398199	0.0558864	0.137939	0.0368366	0.0420699
Bdellovibrio bacteriovorus	959	0.0507474	0.0676102	0.0360861	0.0172514	0.0734941	0.0406901	0.0650492	0.0318607	0.015875
Metschnikowia aff. pulcherrima	2163413	0.0151032	0.0342249	0.0321832	0.0070316
Deltaproteobacteria bacterium	2026735	0.102769	0.099397	0.036086	0.0447036	0.0876805	0.113634	0.0990329	0.0365206	0.0431429	0.0930792	0.099719	0.129416	0.0330165	0.0502818	0.0633727
Paenibacillus jilunlii	682956	0.284614	0.276718	0.165789	0.0522499	0.276788	0.267976	0.305266	0.136351	0.0521542	0.276503	0.335355	0.283347	0.126737	0.0358445	0.229713	0.266866	0.333189	0.283472	0.12616	0.0372846	0.22816	0.263809	0.107336	0.328555	0.279957	0.226156	0.0412646	0.261189	0.32648	0.276425	0.136279	0.0379862	0.226778	0.259369	0.323683	0.274282	0.135752	0.0375531	0.225475	0.254974	0.316903	0.119395	0.268765	0.0396492	0.22233
Sphaerobolus stellatus	68786	0.042102	0.0397923	0.0407314	0.010527
Trametes pubescens	154538	0.0335077	0.0459317	0.0317179	0.0138369
Prochlorococcus sp. MIT 1303	1723647	0.0450237	0.0997073	0.0362551	0.0171046	0.103715	0.0537694	0.0544763	0.0272808	0.0196564
Moraxella equi	60442	0.0191629	0.029722	0.0535637	0.0223827
Moraxella caprae	90240	0.0159617	0.0292857	0.0490038	0.0177771
Streptococcus gordonii	1302	14.3345	18.2952	4.34282	0.742605	18.6615	15.5679	14.4934	3.34125	0.6717	18.022	17.39	21.3396	2.90431	0.585822	8.09909	17.1119	17.0454	21.376	2.84401	0.570018	7.88179	16.4244	2.3848	15.7973	20.5402	7.59985	0.497223	15.8096	16.1357	19.706	3.39601	0.582964	7.3198	15.4221	15.6996	19.2084	3.3361	0.578604	7.15105	14.4607	14.6846	2.70475	17.9764	0.528728	6.74676	13.2501	13.4012	2.63412
Candidatus Pelagibacter ubique	198252	0.41503	0.407204	0.304412	0.159806	0.407246	0.416995	0.426943	0.2755	0.15497	0.405519	0.470768	0.461811	0.26346	0.147151	0.316632	0.396902	0.467144	0.462087	0.261837	0.146151	0.314015	0.391161	0.245538	0.457439	0.454832	0.310579	0.136194	0.386085	0.45911	0.447412	0.274453	0.149827	0.306268	0.38271	0.454077	0.442965	0.272901	0.14945	0.304142	0.374355	0.442385	0.25758	0.431918	0.141376	0.2989	0.363425	0.427102	0.254169
Tissierella creatinini	43143	0.0664357	0.060605	0.0415531	0.0239964	0.0563504	0.0582934	0.0901826	0.0325548	0.0197104
Oceanospirillum linum	966	0.735619	0.635994	0.34223	0.151856	0.593903	0.750916	0.76057	0.312042	0.137781	0.584626	0.870387	0.958555	0.296826	0.12476	0.442595	0.567925	0.860718	0.959527	0.294837	0.122452	0.437656	0.557326	0.267129	0.827577	0.936619	0.43113	0.114141	0.547991	0.835319	0.913709	0.312429	0.128356	0.42833	0.541816	0.822214	0.899667	0.310498	0.128008	0.424294	0.526659	0.791739	0.28059	0.864946	0.123679	0.414427	0.506981	0.752373	0.277433
Achromatium sp. WMS1	1604834	20.2975	28.0098	6.91303	0.905031	29.0106	22.6926	19.7096	5.26049	0.8245	27.8108	23.6115	33.5551	4.63945	0.687713	10.1145	26.3429	23.1388	33.6098	4.53837	0.667459	9.84102	25.2749	3.78474	21.4162	32.2892	9.48528	0.554749	24.3154	21.9679	30.9625	5.41757	0.698146	9.09947	23.7128	21.3686	30.1747	5.31916	0.692248	8.8876	22.217	19.9751	4.30556	28.2193	0.60846	8.37618	20.3343	18.2116	4.18006
Cryobacterium sp. Sr59	1259202	0.241497	0.294613	0.157139	0.0792906	0.29774	0.262931	0.249821	0.130467	0.0777217	0.294874	0.287929	0.284479	0.117195	0.0730717	0.192171	0.290476	0.286153	0.284609	0.116636	0.0701285	0.190906	0.287088	0.115915	0.280479	0.281054	0.189214	0.0550109	0.284051	0.279176	0.27756	0.130373	0.0626044	0.192079	0.282041	0.276903	0.275376	0.129813	0.0624913	0.190969	0.27702	0.27132	0.119127	0.27012	0.0630351	0.188329
Proteiniphilum sp. X52	2382159	0.128728	0.0995044	0.0749893	0.0344901	0.114686	0.0994967	0.133867	0.08486	0.0159051	0.112038	0.131871	0.0818545	0.0766383	0.0154023	0.149273	0.108881	0.131115	0.0817421	0.0763108	0.0160036	0.148332
Klebsiella quasipneumoniae	1463165	0.239069	0.204588	0.158537	0.0574929	0.208801	0.229835	0.243195	0.14291	0.0450649	0.204957	0.260287	0.235225	0.129719	0.0365167	0.222435	0.198501	0.258685	0.235309	0.129097	0.0380215	0.220984	0.196506	0.106375	0.254383	0.232574	0.219012	0.0492189	0.194696	0.253589	0.229861	0.144799	0.0339462	0.218227	0.193464	0.251584	0.228179	0.144156	0.0339941	0.217023
Campylobacter ureolyticus	827	0.054135	0.0472764	0.000532034	0.000344411
Labedaea rhizosphaerae	598644	0.0874795	0.118155	0.0411129	0.020657	0.111334	0.106219	0.0893198	0.040733	0.0120605	0.108764	0.106009	0.117271	0.0409463	0.000522164	0.06631
SEN virus	136966	0.0887589	0.0856264	0.0235974	0.0248819	0.0999537	0.0703682	0.0741607	0.0284992	0.024505
Beggiatoa sp. PS	422289	0.100537	0.109176	0.0881822	0.0313877	0.110277	0.117253	0.0992225	0.0651124	0.0321058	0.107706	0.106231	0.126211	0.0585462	0.0208198	0.120712	0.104688	0.105789	0.126178	0.0583176	0.0214802	0.119945
Francisella sp.	2047875	0.0869373	0.068412	0.117384	0.0396481	0.0756358	0.070992	0.089204	0.121528	0.0327571	0.0682353	0.0972052	0.142397	0.113159	0.0259772	0.0115091
Lymphocystis disease virus Sa	1898060	0.0267717	0.0200511	0.0228282	0.0171046
Allomyces macrogynus	28583	0.0569243	0.0546825	0.0271841	0.0171046	0.0567716	0.057803	0.0494361	0.0183836	0.0234889
Neisseria sp. WF04	2558283	0.066264	0.075631	0.0548848	0.0243022	0.0804542	0.0826933	0.0494605	0.0455846	0.0240585
Finegoldia magna	1260	0.0936793	0.144353	0.0342328	0.00715187	0.125946	0.16178	0.0563833	0.029025	0.00824235	0.128642	0.0566356	0.193879	0.0305986	0.00548358	0.0604328
Small anellovirus	393049	0.0257301	0.014691	0.0554935	0.0214016
Torque teno midi virus 4	2065045	0.0294396	0.00667881	0.054457	0.0176373
Proteus mirabilis	584	5.3229	7.73175	1.86183	0.468236	8.00856	6.02297	5.25616	1.44716	0.445784	7.76061	6.27097	8.26981	1.29614	0.413986	2.85527	7.37142	6.15354	8.28348	1.27449	0.40585	2.78758	7.08638	1.12956	5.7212	7.97116	2.69904	0.362548	6.83176	5.86879	7.65848	1.4738	0.409449	2.59755	6.67114	5.71884	7.474	1.45311	0.407276	2.54502	6.27268	5.36906	1.23353	7.01379	0.381664	2.41858	5.77119	4.92769	1.20879
Microbacterium laevaniformans	36807	3.92435	5.40317	1.55328	0.423931	5.48501	4.53082	3.77917	1.29005	0.395684	5.29551	4.44359	6.40854	1.16028	0.355615	2.34469	5.06376	4.36381	6.41734	1.14183	0.347669	2.28968	4.87304	1.03199	4.06512	6.17917	2.22016	0.301525	4.70384	4.15306	5.94196	1.31075	0.354329	2.1426	4.59737	4.0509	5.80268	1.29323	0.352705	2.10114	4.33335	3.81194	1.10679	5.45118	0.326618	2.001	3.99794	3.51014	1.09129
Mycobacterium intermedium	28445	0.0501792	0.0754465	0.0184748	0.0205617	0.0801709	0.0527192	0.0443272	0.022977	0.0197479
Aspergillus niger	5061	0.0239985	0.0341316	0.0139549	0.00703199
Pedobacter sp.	1411316	54.6093	82.0462	12.931	1.42461	86.3617	63.2055	52.0837	9.00908	1.28368	83.7849	63.4039	87.088	7.56061	1.06222	29.3559	77.949	62.1153	87.2403	7.3898	1.04137	28.5323	74.7434	6.29031	57.2692	83.7697	27.467	0.818231	71.8781	58.858	80.3047	9.11806	1.05516	26.2498	70.0711	57.2326	78.2372	8.94389	1.0445	25.6152	65.5912	53.4455	7.10019	73.1201	0.921785	24.0855	59.947	48.6548	6.97015
methanotrophic bacterial endosymbiont of Bathymodiolus sp.	280772	4.88353	4.59274	1.57549	0.405543	4.47866	4.92296	5.15576	1.20889	0.381123	4.42757	6.30902	6.26781	1.08437	0.345512	2.7022	4.2173	6.19179	6.27619	1.06769	0.339564	2.63962	4.06473	0.926399	5.84366	6.04372	2.55664	0.30644	3.92536	5.89773	5.81268	1.21698	0.346641	2.473	3.83879	5.74682	5.67602	1.20045	0.344879	2.42373	3.62268	5.39512	1.04583	5.33321	0.316878	2.30437	3.34908	4.95206	1.02279
Aspergillus saccharolyticus	979771	0.0358652	0.031386	0.00490068	0.0070432
cyanobacterium G8-9	2137193	14.3779	19.8546	4.53251	0.746536	20.4498	16.0568	14.3633	3.43424	0.682428	19.7424	17.3634	22.3012	3.00463	0.597695	7.66889	18.6479	17.0185	22.3393	2.94196	0.584375	7.46387	17.896	2.50138	15.7913	21.4663	7.19834	0.499479	17.2254	16.1981	20.594	3.49385	0.600392	6.87415	16.8022	15.7603	20.0725	3.43195	0.595868	6.71638	15.7525	14.7412	2.8077	18.7832	0.539535	6.33829	14.4296	13.4526	2.73359
Pseudomonas stutzeri	316	0.224483	0.204274	0.164985	0.0501494	0.218106	0.212839	0.206408	0.136432	0.0583709	0.20869	0.229725	0.237735	0.126535	0.0472822	0.182131	0.206091	0.228148	0.237823	0.125924	0.0438004	0.180886	0.204029	0.115094	0.226875	0.235044	0.17925	0.0354112	0.202045	0.223	0.232367	0.130829	0.0489091	0.180605	0.200797	0.221351	0.230647	0.130248	0.0488722	0.179551
Methanohalophilus sp. WG1-DM	2491675	0.204969	0.20406	0.172816	0.0722722	0.193438	0.218642	0.211601	0.154387	0.0694894	0.194283	0.225814	0.248958	0.142352	0.0634853	0.153381	0.188189	0.224369	0.249048	0.141643	0.0661393	0.152408	0.186311	0.135056	0.222285	0.246088	0.151084	0.0550435	0.18461	0.226608	0.243176	0.154676	0.0637482	0.141775	0.183453	0.22499	0.241374	0.154013	0.0635916	0.140993
Nocardia arthritidis	228602	0.0805977	0.0781402	0.0744957	0.0206255	0.0796382	0.0781163	0.0742813	0.0742838	0.0199601	0.0776531	0.0660975	0.0964972	0.071107	0.0103347	0.0776243
Zygosaccharomyces mellis	42258	1.52545	1.40945	0.591893	0.238404	1.37049	1.50614	1.65469	0.489249	0.226206	1.3416	1.9477	1.86128	0.456503	0.205915	0.999071	1.27834	1.91626	1.86411	0.452242	0.204396	0.981839	1.24274	0.415948	1.79829	1.80673	0.959202	0.187891	1.21047	1.82558	1.75083	0.491271	0.208201	0.950227	1.19046	1.78704	1.71576	0.486968	0.207444	0.936285	1.14002	1.69697	0.440356	1.63152	0.197082	0.902609	1.0761	1.58313	0.435254
Ralstonia mannitolilytica	105219	0.0331186	0.0262173	0.0319155	0.0137987
Laccaria bicolor	29883	0.0269177	0.0569084	0.0228282	0.0138824
Haemophilus haemolyticus	726	0.0634509	0.0263194	0.0281329	0.0178494
Chrysochromulina tobinii	1460289	0.062492	0.0627302	0.0321278	0.0205253	0.0633368	0.0688685	0.0449538	0.0321402	0.0236206
Taterapox virus	28871	0.0330146	0.0370678	0.0320566	0.0206617
Eimeria necatrix	51315	0.080329	0.132121	0.0595157	0.0483384	0.122428	0.128592	0.0700098	0.0510204	0.0432217	0.123501	0.0842218	0.148668	0.0546485	0.0300551	0.0656048	0.120052	0.0835631	0.148674	0.0543934	0.0311521	0.0652144
Acinetobacter idrijaensis	1507807	0.0477252	0.0370635	0.0370106	0.0104295
Phytophthora infestans	4787	0.0872655	0.127913	0.0984924	0.0348521	0.131534	0.101019	0.0959308	0.0851478	0.0317399	0.128502	0.100802	0.130415	0.0814153	0.0204926	0.0633685	0.124893	0.0999981	0.13041	0.0810325	0.0213278	0.0629852
Gregarina niphandrodes	110365	0.10184	0.129279	0.0690585	0.0417395	0.114355	0.12178	0.117914	0.0505959	0.0441468	0.119453	0.10951	0.127177	0.0499009	0.0461634	0.110022	0.119763	0.10865	0.12714	0.0496839	0.0427785	0.109333
Actinosynnema pretiosum	42197	0.0690468	0.0676143	0.00490232	0.00709041	0.0693879	0.0661607	0.0597407	0.00471214	0.00816087
Sphingobacteriales bacterium	2044944	0.0387025	0.0201415	0.0405578	0.0240899
Pseudomonas nitroreducens	46680	0.400217	0.361495	0.198311	0.0886014	0.356742	0.385189	0.421517	0.172599	0.0796816	0.356051	0.455718	0.442831	0.16415	0.0635458	0.280031	0.341363	0.452296	0.443081	0.163393	0.0661309	0.277831	0.336717	0.145932	0.442692	0.436508	0.274941	0.0639839	0.332742	0.444387	0.429802	0.173414	0.0688956	0.272879	0.330019	0.439614	0.425671	0.172654	0.0687484	0.271076	0.323419	0.428584	0.158693	0.414977	0.0646909	0.266616
Vibrio agarivorans	153622	9.49631	13.5465	3.01397	0.584187	14.1942	10.765	9.14561	2.30439	0.544338	13.78	11.0105	14.8649	2.02117	0.481535	5.22646	12.8711	10.7984	14.8908	1.98232	0.477056	5.09103	12.3597	1.71575	9.97991	14.3171	4.91567	0.416071	11.902	10.241	13.739	2.33503	0.486457	4.7303	11.6136	9.96921	13.397	2.29756	0.483404	4.62573	10.8973	9.33703	1.91805	12.5481	0.440782	4.37412	9.99506	8.53677	1.87879
Eimeria brunetti	51314	0.0415242	0.0550705	0.0182737	0.0104496
[Candida] inconspicua	52247	0.523907	0.486323	0.293928	0.146348	0.480644	0.505846	0.554601	0.261284	0.138033	0.472182	0.603258	0.57207	0.251	0.121801	0.422174	0.461181	0.597909	0.572465	0.249537	0.119522	0.417803	0.453756	0.234134	0.576858	0.562188	0.412118	0.105234	0.447187	0.583198	0.551693	0.262459	0.124362	0.406057	0.442833	0.575726	0.545421	0.261058	0.12404	0.402544	0.432097	0.558444	0.246759	0.52978	0.113123	0.393935	0.418085	0.535846	0.244903
Mycobacterium kansasii	1768	0.696306	0.620142	0.352855	0.160214	0.599538	0.677875	0.746253	0.304465	0.151725	0.595872	0.858094	0.783292	0.289626	0.13478	0.486295	0.581527	0.848542	0.783959	0.287724	0.131952	0.480744	0.570542	0.267079	0.811878	0.767056	0.473511	0.117512	0.560901	0.824114	0.749798	0.305768	0.1366	0.467784	0.55449	0.811345	0.739598	0.30392	0.136232	0.463293	0.538773	0.781575	0.280109	0.714114	0.127216	0.452349	0.518411	0.743167	0.278468
Propionibacterium virus PHL092M00	1982282	0.0527599	0.0582222	0.00490219	0.000343346
Flavobacterium sp. JRM	1566022	0.145917	0.0976933	0.0576782	0.0415703	0.0938198	0.121067	0.1615	0.0424407	0.0442781	0.087812	0.162685	0.137279	0.0466415	0.0411429	0.113804	0.0854681	0.161618	0.137276	0.0462862	0.0427934	0.113076
Dendrothele bispora	1314803	0.0293663	0.0341209	0.0228281	0.00707859
Brachybacterium timonense	2050896	0.0297121	0.0431511	0.0138177	0.0103973
Streptomyces sp. JV178	858632	0.920513	0.867239	0.466645	0.202283	0.841118	0.913977	0.975173	0.417898	0.188378	0.822376	1.10358	1.1336	0.394986	0.171208	0.61532	0.791751	1.08957	1.13481	0.39165	0.169703	0.607149	0.773784	0.355921	1.04327	1.10553	0.596329	0.156181	0.758	1.05661	1.07685	0.42101	0.174848	0.584429	0.747752	1.03802	1.05888	0.417729	0.174288	0.577933	0.722448	0.995126	0.377307	1.01478	0.165261	0.562115	0.68986	0.940222	0.368773
Streptococcus oralis	1303	30.2641	24.9243	16.4731	2.30819	24.2052	27.7853	35.395	13.5299	1.98372	23.3028	43.4239	38.4929	12.0988	1.7064	15.7626	22.2074	42.5522	38.5556	11.8103	1.69591	15.3271	21.3075	9.84185	39.9439	37.0363	14.7602	1.37736	20.5057	40.4043	35.5122	13.8411	1.80513	14.228	20	39.2936	34.6074	13.5726	1.78423	13.8898	18.744	36.7002	11.2215	32.3599	1.50814	13.0746	17.1625	33.4276	10.6555
Alcanivorax venustensis	172371	0.140915	0.137463	0.1045	0.0381516	0.14525	0.130709	0.142321	0.0844346	0.044125	0.145096	0.153389	0.147019	0.0855585	0.0305201	0.0987925	0.14083	0.152441	0.147042	0.0851605	0.0317516	0.0981468	0.139512	0.0728629	0.15296	0.145456	0.0973376	0.034096
Lobosporangium transversale	64571	0.0723596	0.09997	0.0639214	0.024062	0.100455	0.0828434	0.0802185	0.0502656	0.0237133	0.094554	0.0842232	0.0975845	0.0540244	0.0202658	0.0529318
Frateuria terrea	529704	0.207339	0.234147	0.161099	0.0576648	0.250075	0.207298	0.205001	0.144519	0.053413	0.238117	0.218854	0.249033	0.129947	0.0470885	0.158839	0.229961	0.217788	0.249142	0.129227	0.0490056	0.157836	0.227384	0.123094	0.208369	0.246365	0.156476	0.0418244	0.225145	0.213665	0.243384	0.145594	0.0437258	0.157521	0.223583	0.212069	0.241622	0.144925	0.043719	0.156658
Enterobacter sp. HPCN14	2202832	0.274925	0.248659	0.172528	0.0945697	0.255298	0.260323	0.286282	0.151945	0.087741	0.255831	0.326281	0.28794	0.144011	0.0756992	0.181405	0.247069	0.324235	0.288069	0.143363	0.0789592	0.180183	0.244304	0.129687	0.319137	0.284537	0.178606	0.0810486	0.241917	0.319213	0.280967	0.151023	0.0800429	0.179934	0.240256	0.316519	0.278804	0.150346	0.0798764	0.178891	0.236248	0.310009	0.139653	0.273227	0.0783392	0.176468
Pseudogymnoascus sp. 24MN13	1622150	0.0449438	0.0374258	0.0320349	0.0139132
Vibrio cholerae	666	10.0396	14.4494	3.32846	0.664913	14.8778	11.3705	9.79032	2.57967	0.625528	14.2138	11.7184	16.913	2.31873	0.565033	4.70475	13.5489	11.4909	16.9419	2.27267	0.549476	4.58407	13.0073	1.91902	10.6412	16.2857	4.42743	0.496619	12.5255	10.9364	15.6285	2.66389	0.561355	4.26403	12.2205	10.6451	15.2368	2.61939	0.557532	4.17119	11.4653	9.96677	2.14504	14.264	0.519541	3.94635	10.5141	9.10945	2.08946
Neocallimastix californiae	1754190	0.104578	0.10451	0.0794831	0.0312389	0.105281	0.115276	0.0852005	0.0842446	0.0240295	0.10288	0.0891699	0.13793	0.0813022	0.0204651	0.0639932
Anaerococcus urinomassiliensis	1745712	0.0434231	0.0290043	0.00498167	0.000422785
Anaplasma phagocytophilum	948	0.0544844	0.0259617	0.0510042	0.020759
Paenibacillus sp. FSL H8-0548	1920422	1.40524	1.20534	0.533943	0.225349	1.15097	1.37573	1.53664	0.425954	0.222443	1.14997	1.84701	1.60718	0.401033	0.209303	0.836046	1.11944	1.81737	1.60883	0.397498	0.205061	0.822813	1.08898	0.375256	1.7322	1.56211	0.805436	0.184037	1.06338	1.74898	1.51555	0.428299	0.207725	0.791334	1.04606	1.71258	1.48726	0.424822	0.206968	0.7808	1.00428	1.62739	0.392961	1.4172	0.195732	0.755218	0.950722	1.51958	0.38818
Mycobacteroides abscessus	36809	26.5118	39.9669	7.92038	1.0483	41.6067	30.9057	25.4009	5.92101	0.948753	40.2569	30.6421	43.0312	5.06709	0.817105	14.296	38.0065	30.0285	43.1041	4.95294	0.792969	13.9024	36.4562	4.21585	27.8102	41.4006	13.3926	0.647007	35.0658	28.5012	39.6972	6.06028	0.805154	12.7808	34.1922	27.7198	38.6814	5.94881	0.797955	12.4772	32.0215	25.9008	4.77594	36.1668	0.710072	11.7492	29.2889	23.6051	4.67242
Chlorogloeopsis fritschii	1124	0.0385932	0.0370634	0.00934365	0.0103829
Enterobacter roggenkampii	1812935	12.7879	18.595	4.97638	0.829064	18.9962	14.932	12.1668	4.14601	0.74371	18.141	14.5447	22.4432	3.69605	0.657394	6.08025	17.3752	14.2571	22.4823	3.61713	0.634377	5.91958	16.6775	3.11078	13.2889	21.598	5.71359	0.523432	16.0514	13.6397	20.7183	4.30938	0.65606	5.42091	15.6577	13.2728	20.1947	4.23016	0.650614	5.29858	14.6798	12.4189	3.41353	18.8967	0.587652	5.00594	13.4504	11.3374	3.30206
Hyphomicrobiales bacterium	1909294	0.0328232	0.072404	0.0409078	0.0205257	0.0723288	0.052954	0.0348452	0.0272808	0.0235776
Mycobacterium sp. 1554424.7	1834082	0.446998	0.441602	0.213852	0.114545	0.441838	0.440926	0.462935	0.192685	0.103667	0.419549	0.509779	0.559214	0.181331	0.0928345	0.300781	0.409358	0.505762	0.559612	0.180407	0.0902925	0.298375	0.403201	0.177016	0.48785	0.54972	0.295181	0.0704209	0.397689	0.498769	0.539665	0.192029	0.091004	0.290833	0.394053	0.493017	0.533611	0.191136	0.0908184	0.288882	0.385084	0.479591	0.179187	0.518444	0.084419	0.284122	0.373341	0.462092	0.176471
Entamoeba invadens	33085	0.04463	0.0258218	0.0227287	0.0137976
Frankia sp. Ea1.12	573499	1.3819	1.15137	0.590085	0.226639	1.10937	1.34913	1.46296	0.50401	0.210595	1.10056	1.71131	1.65133	0.477081	0.187623	0.858939	1.06561	1.68454	1.65331	0.472383	0.184075	0.845126	1.0374	0.426658	1.60478	1.60455	0.827124	0.164708	1.01332	1.617	1.55661	0.506229	0.192419	0.813749	0.9973	1.58388	1.527	0.501749	0.191761	0.802779	0.958284	1.50703	0.45785	1.45447	0.176243	0.776084	0.908322	1.40961	0.448552
Lyophyllum shimeji	47721	0.0479644	0.0375785	0.0183949	0.0138572
Maridesulfovibrio zosterae	82171	0.276249	0.155833	0.157808	0.0832316	0.150552	0.192502	0.342577	0.145439	0.0791952	0.151718	0.378355	0.238696	0.134215	0.0639586	0.147133	0.147198	0.375619	0.238796	0.133621	0.0665655	0.146145	0.145792	0.126884	0.366098	0.235787	0.144841	0.0566619	0.144442	0.363889	0.232691	0.139241	0.0693221	0.151734
Cutibacterium acnes	1747	182.28	260.638	60.6387	5.45097	270.08	202.521	181.135	46.9566	4.59028	256.568	218.938	305.117	41.1972	3.47701	85.6985	243.48	214.459	305.658	40.1713	3.29324	83.2645	233.42	32.9585	199.324	293.452	80.11	2.35339	224.42	203.737	281.247	48.6738	3.55074	76.6474	218.757	198.06	273.964	47.701	3.4992	74.7706	204.706	184.87	37.7035	255.951	2.83383	70.2508	186.997	168.17	36.2876
Bifidobacterium animalis	28025	0.233577	0.235636	0.162525	0.0786321	0.221505	0.252247	0.230289	0.142311	0.079347	0.223003	0.248079	0.272402	0.142143	0.0569423	0.22108	0.219761	0.24644	0.272517	0.141475	0.053938	0.219606	0.217417	0.133615	0.243767	0.269258	0.217615	0.040905	0.215215	0.24127	0.266	0.141703	0.063376	0.216806	0.213807	0.239332	0.263987	0.14114	0.0632185	0.215578
Ligilactobacillus animalis	1605	0.244381	0.242506	0.224571	0.108366	0.248655	0.239878	0.256999	0.209593	0.100193	0.242281	0.272557	0.267023	0.205475	0.0810421	0.223767	0.234096	0.270695	0.267135	0.204406	0.084433	0.222165	0.231522	0.185772	0.268468	0.263974	0.219971	0.0788036	0.229269	0.266938	0.26077	0.209859	0.0924565	0.216967	0.227708	0.264778	0.258825	0.208853	0.0922642	0.215655	0.223944	0.259313	0.196425	0.25385	0.0842428	0.212483
Listeria monocytogenes	1639	7.13808	9.94324	2.39332	0.521723	10.3337	8.03657	6.9659	1.8477	0.489967	10.0373	8.39145	11.0274	1.63244	0.44166	3.91506	9.43387	8.22767	11.0436	1.60274	0.436231	3.81735	9.06287	1.41377	7.67247	10.6199	3.68996	0.378055	8.73284	7.82692	10.2002	1.88081	0.441576	3.54692	8.52366	7.62333	9.94892	1.85258	0.439114	3.47088	8.00658	7.14688	1.58179	9.32478	0.398648	3.28917	7.35488	6.54569	1.55805
Microbacterium arborescens	33883	0.239134	0.238165	0.156757	0.0669321	0.24828	0.212949	0.262585	0.130326	0.0686821	0.240576	0.287634	0.239471	0.128426	0.0594537	0.162408	0.232715	0.285875	0.239551	0.127791	0.0619444	0.161296	0.230261	0.117318	0.281083	0.236706	0.159769	0.0581473	0.228084	0.282247	0.233937	0.131143	0.066116	0.160715	0.22659	0.279916	0.232205	0.130624	0.06595	0.159784
Propionibacterium virus PAD20	1982271	0.0689403	0.0601188	0.000493964	0.000343141
Acidianus manzaensis	282676	0.0392751	0.0757224	0.0702782	0.0627637	0.0808867	0.0491905	0.0451586	0.0797707	0.0522707	0.0792253	0.0502983	0.0570727	0.0810556	0.0461944	0.0433655
Thamnocephalis sphaerospora	78915	0.0415243	0.0343185	0.000496437	0.0103973
Pneumocystis jirovecii	42068	0.121432	0.111727	0.0416772	0.0138355	0.110587	0.114089	0.12663	0.0274677	0.0158954	0.107943	0.130567	0.116414	0.0251646	0.0104281	0.118606
Alphaproteobacteria bacterium	1913988	0.050322	0.0313004	0.0407322	0.0139132
Stenotrophomonas panacihumi	676599	0.0781776	0.0655369	0.0365471	0.0137976	0.0748971	0.0778855	0.0644477	0.0365554	0.00428703
bacterium	1869227	0.268674	0.325627	0.217188	0.0872673	0.328997	0.267944	0.295693	0.183172	0.0886243	0.326906	0.310445	0.310717	0.168174	0.0858308	0.20383	0.319336	0.308702	0.310865	0.167273	0.0838923	0.202481	0.315301	0.166062	0.300685	0.306808	0.200691	0.0632035	0.311819	0.311825	0.302656	0.184331	0.0795452	0.188251	0.309461	0.309289	0.300118	0.18343	0.0793809	0.187174	0.303619	0.303179	0.167873	0.293941	0.0770293	0.184677
Streptococcus australis	113107	0.0268492	0.0258762	0.0274829	0.0103973
Legionella nagasakiensis	535290	0.0537814	0.0841644	0.00484646	0.0104326	0.0871133	0.0534693	0.0549878	0.00471302	0.0119832
Photobacterium sanguinicancri	875932	0.299748	0.248407	0.197073	0.10298	0.233968	0.294272	0.311614	0.179073	0.0964836	0.23976	0.334927	0.307118	0.169469	0.09549	0.22971	0.235975	0.332745	0.307261	0.168658	0.094012	0.228088	0.233461	0.161692	0.32712	0.303565	0.226005	0.0830429	0.231138	0.325883	0.299849	0.177761	0.0946354	0.226644	0.22963	0.322997	0.297578	0.176973	0.0944392	0.225302	0.22583	0.316185	0.169828	0.291932	0.0872576	0.221989
Trypanosoma cruzi	5693	0.345811	0.331292	0.243241	0.153216	0.334735	0.329528	0.358887	0.230034	0.147034	0.334317	0.385523	0.373172	0.226032	0.129135	0.271216	0.321462	0.382945	0.37337	0.224796	0.135303	0.269055	0.31734	0.212602	0.374292	0.368262	0.266182	0.130427	0.313853	0.373049	0.362992	0.233782	0.138595	0.267914	0.311449	0.369509	0.359798	0.232628	0.138224	0.266094	0.3056	0.361248	0.224791	0.351533	0.128555	0.261583	0.297773	0.350438	0.222763
Fusarium clavum	1385656	0.301623	0.303917	0.160844	0.0584951	0.299837	0.319314	0.278319	0.12334	0.0689475	0.29374	0.288698	0.382261	0.127259	0.0534056	0.218928	0.287635	0.287273	0.382447	0.126563	0.0501337	0.21736	0.284252	0.126828	0.273387	0.377252	0.215327	0.0349179	0.281203	0.28183	0.3719	0.130095	0.0553925	0.214639	0.279184	0.279389	0.368671	0.129503	0.055322	0.213374	0.274182	0.273802	0.124188	0.360555	0.0474166	0.210195
Burkholderia multivorans	87883	7.85756	6.79591	2.5343	0.48332	6.49891	7.5742	8.77578	1.97599	0.432852	6.36058	10.7172	9.94433	1.73327	0.377513	4.28573	6.01664	10.509	9.95896	1.70096	0.371902	4.17729	5.78596	1.41484	9.87018	9.57977	4.03678	0.327387	5.58277	9.93948	9.20355	1.98774	0.3851	3.94129	5.45367	9.67637	8.97693	1.95743	0.382784	3.85566	5.13405	9.0641	1.62512	8.41741	0.34765	3.65068	4.73075	8.28864	1.56933
Staphylococcus argenteus	985002	0.0301649	0.0527293	0.0276343	0.0142528
Streptococcus pseudopneumoniae	257758	0.0602775	0.0648693	0.0322117	0.00706676	0.0696823	0.0641165	0.0527883	0.0276855	0.00427082
Human endogenous retrovirus K	45617	0.476129	0.437787	0.286811	0.122593	0.426849	0.473532	0.496583	0.234223	0.123737	0.426558	0.550987	0.504543	0.225301	0.10792	0.383685	0.423852	0.546374	0.504878	0.224013	0.103653	0.379973	0.417332	0.210557	0.529618	0.496279	0.375126	0.0912935	0.41139	0.531428	0.487464	0.233576	0.109927	0.372959	0.407507	0.525023	0.482358	0.232342	0.109669	0.369916	0.397837	0.510119	0.222531	0.469926	0.0967122	0.362457	0.385347	0.490731	0.22127
Vibrio campbellii	680	7.33632	10.3212	2.18991	0.480778	10.661	8.5958	6.6958	1.72435	0.448497	10.3158	7.91034	12.2303	1.52399	0.405162	3.7874	9.77198	7.75755	12.25	1.4966	0.395953	3.69349	9.38757	1.30841	7.17622	11.7781	3.5706	0.347309	9.04437	7.39929	11.3098	1.76074	0.401583	3.41221	8.82774	7.20684	11.0292	1.73489	0.399482	3.33957	8.29081	6.75814	1.43896	10.3345	0.371208	3.16567	7.61449	6.19054	1.40499
Corynebacterium freiburgense	556548	0.138468	0.182238	0.068991	0.027573	0.195508	0.126382	0.168187	0.0407329	0.0317024	0.194955	0.184935	0.153659	0.041095	0.0103853	0.0945282	0.188981	0.183895	0.153677	0.0409605	0.0107456	0.0939333	0.187111	0.0392337	0.17607	0.151982	0.0931889	0.00718474
Propionibacterium virus P101A	1982267	0.0530256	0.0316224	0.000493885	0.000343607
uncultured marine group II/III euryarchaeote KM3_87_G01	1456533	0.764989	0.748641	0.418427	0.201368	0.741583	0.767005	0.793445	0.365816	0.193669	0.738521	0.904943	0.916581	0.346155	0.180021	0.525044	0.711777	0.894888	0.917462	0.34351	0.179208	0.518733	0.696522	0.315148	0.86517	0.896092	0.510518	0.170485	0.683184	0.871055	0.874678	0.366916	0.181975	0.500588	0.67445	0.857155	0.861592	0.364352	0.181451	0.495546	0.652921	0.824812	0.336867	0.82912	0.173374	0.483288	0.625128	0.783112	0.33432
Campylobacter hepaticus	1813019	3.39437	3.30859	1.06352	0.307653	3.15839	3.49662	3.59232	0.850825	0.285594	3.08264	4.37204	4.53939	0.764877	0.258356	1.88376	2.93784	4.29369	4.54633	0.755003	0.253644	1.84215	2.83822	0.664734	3.98772	4.38558	1.78933	0.230163	2.74502	4.08395	4.22206	0.85627	0.258596	1.74949	2.68802	3.98057	4.12528	0.846046	0.257519	1.71759	2.54429	3.74869	0.725609	3.88513	0.242609	1.63961	2.36376	3.4505	0.716129
Streptomyces gilvosporeus	553510	0.05082	0.0573687	0.0456203	0.00707526	0.0562814	0.045031	0.0698535	0.0320475	0.00815575
bacterium NHP-B	2491344	0.0531039	0.0488106	0.0320776	0.0205257	0.0482166	0.0614777	0.0394145	0.0275692	0.0235784
Calothrix sp. HK-06	1137096	0.053862	0.0640772	0.0658026	0.00703206	0.0683983	0.0406955	0.0649794	0.0657576	0.00427044
Rhizopus microsporus	58291	0.0387025	0.0313863	0.0093593	0.0206512
Burkholderia sp. Bk	1938441	0.19916	0.150977	0.143657	0.0604528	0.145225	0.179519	0.209982	0.127827	0.0614122	0.147488	0.228963	0.167906	0.115377	0.0586402	0.184584	0.147636	0.227515	0.167949	0.114808	0.0551863	0.183387	0.146241	0.110205	0.225707	0.166073	0.181837	0.0425234	0.144902	0.222597	0.164325	0.123184	0.0542674	0.182968
Postia placenta	104341	0.0326363	0.0488074	0.0138787	0.0105254
Chlamydomonas reinhardtii	3055	0.099858	0.105134	0.0271823	0.0172466	0.102674	0.104568	0.0945639	0.0228241	0.015875	0.100406	0.10022	0.104309	0.0166005	0.0203155	0.095429
Pedobacter panaciterrae	363849	12.1041	17.5103	3.49703	0.572287	18.5586	13.7434	11.5497	2.65513	0.519617	18.0038	14.0142	18.8821	2.20315	0.456871	6.85643	16.6129	13.7364	18.9126	2.15929	0.45535	6.67415	15.9427	1.83449	12.7259	18.1754	6.43953	0.393731	15.3477	13.0085	17.4413	2.6655	0.454734	6.19205	14.9713	12.6593	17.0007	2.62022	0.452172	6.05141	14.0407	11.8475	2.09341	15.9154	0.417714	5.71403	12.8645	10.8214	2.08381
Mycobacterium sp. 1100029.7	1834067	0.830858	0.801346	0.448165	0.20527	0.784726	0.844173	0.852346	0.386174	0.198532	0.778152	0.961333	0.979443	0.364135	0.191508	0.555192	0.762128	0.95026	0.980348	0.361236	0.188113	0.54827	0.745143	0.337737	0.916863	0.956816	0.539149	0.173908	0.730492	0.923542	0.932631	0.388324	0.190157	0.528651	0.720632	0.908357	0.91855	0.385499	0.189617	0.523123	0.696713	0.8731	0.356206	0.8833	0.180751	0.50969	0.665908	0.827742	0.352944
Dimargaris cristalligena	215637	0.0387025	0.0372187	0.0318697	0.00703208
Torque teno midi virus	432261	0.0367234	0.0176069	0.0745688	0.0327004
Rickettsia prowazekii	782	0.262099	0.255574	0.15434	0.0629662	0.25153	0.259713	0.283512	0.111936	0.0692278	0.252222	0.312066	0.275511	0.113306	0.0459643	0.22931	0.243676	0.31008	0.275629	0.112756	0.0477908	0.227687	0.240988	0.100171	0.30514	0.272367	0.225598	0.0477598	0.238653	0.306517	0.268906	0.11117	0.057076	0.222244	0.237033	0.303823	0.266864	0.110758	0.0569042	0.220944
Streptomyces griseocarneus	51201	1.09493	1.04079	0.536605	0.230785	1.00736	1.08525	1.18344	0.474736	0.215271	0.99179	1.37815	1.28075	0.441578	0.194344	0.831133	0.966512	1.35826	1.28202	0.437542	0.19047	0.817953	0.942069	0.40116	1.29132	1.24763	0.80088	0.173332	0.921227	1.30715	1.21286	0.474595	0.194986	0.783594	0.907208	1.28226	1.19217	0.470529	0.194277	0.773173	0.873283	1.2244	0.426724	1.14046	0.182717	0.747977	0.829738	1.15084	0.420716
Neisseria polysaccharea	489	1.16219	1.06543	0.675031	0.26599	1.02139	1.18531	1.22005	0.580724	0.253777	1.01277	1.40289	1.43245	0.541686	0.237572	0.805215	0.991048	1.38334	1.4339	0.535772	0.233265	0.792685	0.965601	0.497432	1.33594	1.39381	0.776381	0.208041	0.944123	1.33794	1.3536	0.584978	0.23787	0.75436	0.929494	1.3123	1.32955	0.579271	0.236975	0.744552	0.894354	1.25267	0.536543	1.26938	0.217865	0.720809	0.849192	1.1766	0.529881
Corynebacterium sp. KPL1824	1203561	0.0275738	0.0495224	0.000498678	0.00368979
Endogone sp. FLAS-F59071	2340872	0.462492	0.558316	0.294996	0.15477	0.578338	0.480697	0.455869	0.279589	0.144654	0.560632	0.486185	0.59378	0.266573	0.13029	0.351307	0.540743	0.482399	0.594229	0.264898	0.129122	0.348159	0.53094	0.251557	0.469839	0.583352	0.343986	0.112671	0.522353	0.477214	0.572342	0.280984	0.133037	0.333703	0.516703	0.471926	0.56565	0.279364	0.132723	0.331216	0.50276	0.459276	0.258726	0.548876	0.124478	0.325191	0.484589	0.443146	0.255388
Klebsiella pneumoniae	573	25.2291	33.7695	8.05892	1.10373	34.842	27.8157	24.8847	6.18001	0.992841	33.4897	29.8711	40.4856	5.41612	0.829699	12.9098	31.5538	29.2695	40.5599	5.29352	0.811635	12.5535	30.2647	4.46753	27.1846	38.9567	12.0949	0.663744	29.1215	27.8101	37.3601	6.3657	0.839436	11.5646	28.3941	27.0482	36.4021	6.24815	0.831621	11.2921	26.5977	25.2761	5.07853	34.0421	0.72875	10.6348	24.3344	23.0326	4.92378
Enterobacter ludwigii	299767	0.549863	0.502304	0.348731	0.181996	0.485473	0.559049	0.561222	0.321454	0.171669	0.483186	0.614598	0.632355	0.312066	0.158306	0.425271	0.471148	0.609086	0.63286	0.309885	0.157322	0.420875	0.463427	0.286879	0.594569	0.620764	0.415114	0.146355	0.456636	0.594736	0.608483	0.323641	0.163154	0.40816	0.452123	0.587051	0.601104	0.321584	0.162668	0.404618	0.441006	0.56913	0.302264	0.582688	0.152897	0.395965	0.426489	0.545973	0.297777
Ruminococcaceae bacterium HV4-5-B5C	2048667	2.28403	3.07834	1.06657	0.346028	3.18522	2.53868	2.24562	0.892499	0.329816	3.08977	2.61331	3.3867	0.825195	0.296917	1.51912	2.93409	2.56966	3.39291	0.814247	0.293358	1.48841	2.83415	0.731316	2.42364	3.27676	1.44759	0.264561	2.74137	2.46412	3.16004	0.910854	0.299839	1.39295	2.68432	2.40784	3.08893	0.899428	0.298394	1.36915	2.54095	2.27787	0.78489	2.91714	0.280397	1.31147	2.36057	2.1127	0.768242
Clostridiales bacterium 1_7_47FAA	457421	0.0416233	0.0258163	0.00935902	0.0070432
Trypanosoma vivax	5699	0.112416	0.0983421	0.0551229	0.0581475	0.102197	0.0961431	0.120594	0.0596055	0.051058	0.0954852	0.123633	0.109896	0.0621013	0.0454834	0.0968365	0.0928988	0.122967	0.10983	0.0618696	0.0472744	0.0962156
Mycobacterium attenuatum	2341086	0.0475213	0.0401206	0.0364955	0.0206913
Ichthyophthirius multifiliis	5932	0.0507548	0.0662132	0.0276009	0.0173717	0.0717236	0.0535279	0.0492066	0.0185257	0.0199884
Volvox carteri	3067	0.235544	0.187494	0.156448	0.102637	0.190309	0.207538	0.241346	0.151014	0.0999099	0.186408	0.262984	0.227	0.144723	0.0961143	0.176739	0.180481	0.261463	0.227074	0.143993	0.100429	0.175625	0.17865	0.136406	0.255857	0.22444	0.174201	0.0995079	0.176988	0.254839	0.221857	0.157169	0.0939069	0.177506	0.17586	0.252887	0.220234	0.156438	0.0937238	0.176541
Marinimicrobium sp. LS-A18	1381596	0.655102	0.731874	0.444294	0.183292	0.739983	0.670842	0.675828	0.397052	0.173032	0.721297	0.735516	0.811825	0.373501	0.156883	0.495693	0.703405	0.728094	0.812515	0.370519	0.153814	0.48999	0.688449	0.347685	0.69946	0.794646	0.482359	0.133352	0.675371	0.706037	0.776427	0.401056	0.158609	0.476569	0.666716	0.695878	0.765629	0.398053	0.158132	0.471954	0.645532	0.672266	0.36241	0.738786	0.146423	0.460704	0.618209	0.642056	0.359602
Moniliophthora roreri	221103	0.0296997	0.0313863	0.00935949	0.010477
Acidobacteriales bacterium 13_2_20CM_55_8	1803470	0.0689787	0.102632	0.059004	0.0172205	0.115832	0.0739968	0.0549878	0.0544622	0.0198207	0.109542	0.0616616	0.0792446	0.0491564	0.0103605	0.0840999
Besnoitia besnoiti	94643	0.281653	0.264817	0.179018	0.0887744	0.260344	0.274908	0.295396	0.16038	0.0814802	0.260831	0.304853	0.298614	0.149248	0.0730003	0.240294	0.256227	0.303053	0.298754	0.14855	0.0705923	0.238627	0.253424	0.133256	0.299032	0.29499	0.236431	0.0706591	0.250865	0.296852	0.29126	0.162286	0.0677693	0.236548	0.249184	0.294522	0.288964	0.161533	0.0676364	0.235149	0.244996	0.288892	0.144257	0.283294	0.0698067	0.231721
Cyclospora cayetanensis	88456	0.0419797	0.0368947	0.00927833	0.0138378
Streptomyces sp. PT12	1510197	0.284018	0.239193	0.178826	0.0981661	0.237473	0.267413	0.29744	0.153986	0.0961794	0.236598	0.320421	0.282393	0.151267	0.0961047	0.207625	0.232813	0.318315	0.282517	0.150586	0.0946431	0.206129	0.230294	0.150588	0.313673	0.278821	0.204206	0.0763473	0.227927	0.313144	0.275262	0.154192	0.0988497	0.204144	0.226409	0.31042	0.273015	0.153551	0.0986401	0.202916	0.222597	0.303913	0.152014	0.267528	0.0882717	0.199929
Thecamonas trahens	529818	0.0841642	0.085451	0.0454168	0.0171644	0.0699829	0.106736	0.0696044	0.0409263	0.0197101	0.0760469	0.0782786	0.0970656	0.03687	0.0152525	0.0944964
Maribellus luteus	2305463	0.166201	0.175612	0.145206	0.0570109	0.185223	0.160348	0.176668	0.125896	0.0531853	0.190539	0.194922	0.163717	0.112076	0.058132	0.112862	0.184832	0.193714	0.163736	0.111512	0.0605476	0.112141	0.182961	0.10299	0.191229	0.161903	0.111237	0.0575885	0.181408	0.18872	0.160227	0.120122	0.0587839	0.115914
Thielaviopsis punctulata	72032	0.163976	0.157449	0.108881	0.0561016	0.167281	0.157428	0.159185	0.0934173	0.0567288	0.158542	0.161081	0.191666	0.0799432	0.06298	0.131132	0.153705	0.160055	0.191737	0.0795902	0.0655908	0.130356	0.152229	0.0836602	0.159122	0.189555	0.12925	0.0494885
Nocardioides sp. Root122	1736431	0.0792506	0.103008	0.0182737	0.00704319	0.102548	0.0849015	0.0803031	0.0092461	0.00809844
Lactococcus lactis	1358	0.0446459	0.0493027	0.040732	0.0036896
Bacillus paralicheniformis	1648923	61.6753	43.8888	38.1876	4.92755	41.9457	51.8044	78.8184	31.5643	4.12845	40.445	98.0082	75.0359	28.139	3.39281	29.1789	38.2607	96.0261	75.168	27.4488	3.45694	28.3585	36.6986	22.8335	89.8881	72.1822	27.2945	2.71635	35.3005	90.0193	69.1994	32.3372	3.70386	27.2408	34.4203	87.519	67.4198	31.6813	3.64926	26.5833	32.2351	81.7167	26.5219	63.0156	2.92081	24.9947	29.4838	74.3631	25.4657
Puccinia triticina	208348	7.66914	10.673	2.59912	0.536673	10.9453	8.93122	7.18278	2.05874	0.498155	10.5867	8.49417	12.7984	1.82777	0.45076	3.89501	10.1038	8.33063	12.8197	1.79358	0.438198	3.79744	9.70725	1.55473	7.6873	12.3263	3.67112	0.384371	9.34961	7.93872	11.8356	2.121	0.445493	3.51801	9.1256	7.73074	11.5399	2.08807	0.44274	3.443	8.56914	7.24726	1.70534	10.8121	0.412866	3.26265	7.86867	6.63511	1.66078
Micromonospora peucetia	47871	0.0601931	0.0722111	0.0273025	0.013752	0.0835163	0.045272	0.0647467	0.0227431	0.0158768
Trypanosoma rangeli	5698	0.0417603	0.054409	0.0318983	0.0205538
Paenibacillus sp. FSL H8-0259	1920423	0.244749	0.217668	0.117207	0.0565213	0.212016	0.243768	0.240386	0.0961121	0.0569994	0.211315	0.258481	0.262644	0.0866836	0.0519095	0.198924	0.204666	0.256796	0.26276	0.0862755	0.0540429	0.197596	0.202462	0.0737417	0.254428	0.259798	0.195783	0.0625875	0.200685	0.253029	0.25661	0.0914967	0.0529676	0.194382	0.199379	0.251019	0.254699	0.0911225	0.0529036	0.193272
Campylobacter coli	195	0.863353	0.758217	0.454625	0.209944	0.747257	0.820319	0.932237	0.401908	0.197797	0.74083	1.04949	0.955993	0.3729	0.183745	0.638479	0.715416	1.03676	0.956903	0.369873	0.182676	0.629787	0.700052	0.339561	0.998044	0.934139	0.618437	0.170569	0.686622	1.00248	0.91143	0.404652	0.183083	0.607094	0.677815	0.985322	0.897493	0.401626	0.182554	0.600161	0.656122	0.945565	0.359691	0.862962	0.177464	0.583331	0.628131	0.894562	0.354118
Pseudomonas syringae	317	17.1833	24.1271	5.70028	0.878747	24.9581	19.4802	16.6423	4.37215	0.805225	24.0074	20.0441	27.9641	3.78795	0.706453	8.86976	22.6572	19.6461	28.0131	3.70553	0.691755	8.6304	21.74	3.11844	18.2237	26.9096	8.3203	0.59327	20.9189	18.6607	25.8116	4.48604	0.701344	7.96774	20.4022	18.1538	25.1548	4.40595	0.69565	7.78355	19.12	16.9753	3.53428	23.5329	0.634541	7.34009	17.5054	15.484	3.42817
Fructilactobacillus sanfranciscensis	1625	0.029996	0.0153811	0.0230212	0.0172844
Linderina pennispora	61395	0.0387025	0.0257	0.0280496	0.0070313
Propionibacterium phage pa28	2079401	0.0459543	0.0293449	0.000495535	0.00370287
Planoprotostelium fungivorum	1890364	0.112601	0.0982314	0.065079	0.0377655	0.105236	0.0791128	0.137627	0.0647588	0.0317128	0.106944	0.135845	0.0979568	0.0668136	0.0205129	0.0658392
Ekhidna lutea	447679	0.0180619	0.037064	0.0182733	0.00709255
Acanthamoeba castellanii	5755	0.173205	0.156307	0.0873563	0.0450803	0.15643	0.15347	0.190627	0.06386	0.0522081	0.162004	0.201591	0.150411	0.0629378	0.0455249	0.144351	0.1572	0.200611	0.150416	0.0626335	0.0473135	0.143486	0.155682	0.0650577	0.192354	0.1487	0.142304	0.040516
Ancylomarina longa	2487017	1.04628	0.984109	0.497142	0.211131	0.947584	1.06555	1.07454	0.421914	0.203195	0.939094	1.22387	1.28573	0.398479	0.184832	0.722269	0.912641	1.20765	1.28704	0.395061	0.181421	0.711671	0.890174	0.367214	1.15907	1.25246	0.697891	0.16225	0.870996	1.1814	1.21759	0.421423	0.18726	0.668644	0.858127	1.15995	1.19666	0.418153	0.186663	0.660495	0.826896	1.10961	0.388547	1.14462	0.172886	0.640851	0.786757	1.04537	0.38443
Glonium stellatum	574774	0.0262844	0.034028	0.0182737	0.00369455
Euryarchaeota archaeon	2026739	0.100043	0.12669	0.0748148	0.0343007	0.135646	0.103583	0.0856717	0.0698825	0.0395111	0.135905	0.0895928	0.110307	0.0717915	0.0353665	0.0745019	0.135761	0.0887414	0.110389	0.0714465	0.0315925	0.0739737
Nothophytophthora sp. Chile5	2483409	0.0294604	0.0314049	0.0227949	0.00701949
Janthinobacterium sp. ROICE36	2048670	0.143563	0.136986	0.127852	0.0761193	0.135858	0.132321	0.166561	0.117607	0.0713999	0.142066	0.176164	0.138769	0.118857	0.0608336	0.109903	0.137859	0.175201	0.138766	0.118249	0.0632703	0.109233	0.136558	0.108933	0.168058	0.137259	0.108331	0.0679516
Clostridium perfringens	1502	5.33281	6.85688	2.65264	0.534229	7.07084	5.64673	5.50664	2.27113	0.482958	6.70876	6.48638	8.32598	2.04024	0.431277	2.7682	6.40485	6.36523	8.33966	2.00072	0.422443	2.70187	6.15838	1.72569	5.97884	8.02573	2.61655	0.359892	5.93963	6.0736	7.71032	2.35119	0.436681	2.522	5.80133	5.9176	7.52438	2.3138	0.43388	2.47099	5.45957	5.55437	1.89072	7.06042	0.397323	2.34914	5.02716	5.09513	1.8469
Pseudomonas viridiflava	1705700	2.30359	2.13313	1.00104	0.314767	2.03853	2.32899	2.46279	0.811748	0.298189	2.01922	2.94117	2.92866	0.741047	0.275072	1.36979	1.94993	2.89085	2.93407	0.731145	0.270075	1.34284	1.88742	0.643077	2.75293	2.83463	1.3076	0.248542	1.83197	2.78044	2.73744	0.814809	0.276082	1.26279	1.79701	2.7154	2.67633	0.805377	0.274949	1.242	1.7096	2.56544	0.707694	2.5312	0.257883	1.19157	1.5994	2.37461	0.697393
Paramecium tetraurelia	5888	0.366654	0.336305	0.243885	0.131868	0.328753	0.37081	0.363319	0.224318	0.127674	0.327193	0.402845	0.402766	0.216249	0.113382	0.30353	0.320456	0.39994	0.402995	0.215102	0.111989	0.300993	0.316376	0.203677	0.390975	0.397219	0.29764	0.0988681	0.312697	0.393219	0.39135	0.223466	0.116951	0.292877	0.310268	0.389256	0.387825	0.222381	0.11667	0.290823	0.30425	0.379843	0.210977	0.378989	0.107874	0.285798	0.296319	0.367733	0.208525
Shigella sonnei	624	12.5873	16.7	3.93114	0.69282	17.248	13.858	12.5432	2.92439	0.645392	16.6973	15.2053	18.9266	2.59188	0.548946	7.37288	15.6241	14.9031	18.9581	2.53911	0.543304	7.17659	14.9976	2.16025	13.8332	18.2199	6.92255	0.470574	14.4373	14.1106	17.4829	2.97105	0.561607	6.6586	14.0844	13.7308	17.0421	2.92012	0.557644	6.50608	13.2098	12.8475	2.44767	15.9533	0.49925	6.14105	12.107	11.7307	2.37543
Pseudochlorodesmis sp. HV01306b	2358489	1.09636	1.39815	0.567663	0.23882	1.42438	1.17596	1.10589	0.500803	0.226509	1.37275	1.23961	1.54529	0.475988	0.209498	0.70294	1.32706	1.22271	1.54705	0.471433	0.205609	0.692859	1.28928	0.429225	1.16615	1.50243	0.679521	0.189457	1.2558	1.18299	1.45829	0.507796	0.211675	0.664306	1.23433	1.16082	1.43135	0.503328	0.210979	0.656367	1.18146	1.11056	0.456523	1.36476	0.198628	0.636945	1.1141	1.04622	0.449081
Hamiltosporidium magnivora	148818	1.18714	1.50408	0.654292	0.252847	1.54804	1.27569	1.17726	0.596094	0.234587	1.49484	1.34892	1.68079	0.553686	0.218987	0.720448	1.4592	1.32982	1.68262	0.547856	0.213171	0.709956	1.41588	0.499751	1.2686	1.63288	0.696182	0.19081	1.37824	1.28604	1.58366	0.610326	0.216802	0.680988	1.35358	1.26124	1.55387	0.604237	0.216009	0.672727	1.29366	1.20483	0.524686	1.47955	0.206542	0.652521	1.21719	1.13271	0.521117
Streptomyces sp. AW19M42	1379686	0.0444563	0.0748433	0.0138191	0.00706676
Pseudomonas sp. MDMC224	2218663	0.0444563	0.051384	0.0227289	0.00704341
Blastocystis hominis	12968	0.047388	0.0429733	0.0503279	0.00369203
Moraxella nonliquefaciens	478	0.0434123	0.108446	0.156458	0.0328584	0.135967	0.0385889	0.0606997	0.151037	0.0277146
TTV-like mini virus	93678	0.0316433	0.0270687	0.0494325	0.0184142
Waddlia chondrophila	71667	15.9345	22.492	4.83334	0.781608	23.4845	17.854	15.3888	3.76437	0.707421	22.5481	18.468	25.8157	3.28934	0.619364	7.85725	21.2951	18.1003	25.8602	3.21914	0.604549	7.64684	20.4335	2.68962	16.8147	24.8448	7.37411	0.522487	19.6642	17.2124	23.8325	3.88268	0.616109	7.06473	19.1794	16.7456	23.2259	3.81355	0.611476	6.90278	17.9763	15.6612	3.06227	21.7303	0.557995	6.51253	16.4601	14.2883	2.97396
Ascodesmis nigricans	341454	0.0447078	0.0484122	0.0228791	0.013844
Pseudomonas sp. TTU2014-080ASC	1729724	0.0149074	0.0399059	0.0138177	0.013752
Elizabethkingia meningoseptica	238	0.267952	0.23535	0.194721	0.0878459	0.228723	0.28338	0.252339	0.185759	0.0756034	0.230804	0.262807	0.31731	0.178139	0.0696517	0.194726	0.228163	0.261089	0.317459	0.177313	0.0667006	0.193435	0.225826	0.164647	0.259437	0.313357	0.191706	0.0558403	0.223604	0.257416	0.309246	0.185976	0.0705561	0.190574	0.222194	0.25541	0.306737	0.185153	0.0704028	0.189488	0.218626	0.250414	0.178146	0.300583	0.0585841	0.186877
Propionibacterium virus PHL132N00	1982291	0.0403234	0.0434604	0.000495541	0.000343911
Chlorociboria aeruginascens	296797	0.103265	0.160555	0.0638412	0.0309996	0.176043	0.110254	0.0943411	0.0547859	0.0357338	0.180457	0.100907	0.112532	0.0496133	0.0303285	0.0954004	0.178852	0.10009	0.112548	0.0493989	0.0262607	0.0948328
Reticulomyxa filosa	46433	0.517826	0.45028	0.336774	0.198309	0.436009	0.503454	0.543387	0.314634	0.188669	0.436912	0.594399	0.542257	0.298965	0.180751	0.435918	0.422351	0.58916	0.542647	0.296948	0.183582	0.431284	0.415858	0.272923	0.575479	0.533291	0.425262	0.186833	0.410196	0.572435	0.523841	0.317761	0.182454	0.42091	0.406417	0.565199	0.518048	0.315786	0.181989	0.417151	0.397123	0.548349	0.297572	0.503415	0.174378	0.407965	0.384896	0.526527	0.294203
Phreatobacter oligotrophus	1122261	0.0300805	0.045643	0.0320551	0.0137531
Calocera cornea	29889	0.0501814	0.017204	0.0407315	0.0207551
BeAn 58058 virus	67082	0.760832	0.691452	0.416267	0.185571	0.675665	0.748077	0.78783	0.359426	0.178895	0.674206	0.872606	0.893369	0.332751	0.163727	0.569559	0.65613	0.862962	0.894189	0.3303	0.161338	0.562301	0.642754	0.313344	0.830477	0.873598	0.552974	0.142679	0.631097	0.837149	0.852696	0.358849	0.162712	0.542416	0.623346	0.824037	0.840221	0.356407	0.162295	0.536631	0.604366	0.793573	0.326155	0.80913	0.153802	0.522602	0.579836	0.754304	0.324144
Eimeria tenella	5802	0.032966	0.0257085	0.0227287	0.0137969
Staphylococcus warneri	1292	0.219904	0.231265	0.148192	0.0746811	0.214812	0.253166	0.212459	0.12734	0.0747821	0.220627	0.232949	0.271621	0.11934	0.0688832	0.17936	0.213423	0.231397	0.271731	0.118765	0.0716825	0.178193	0.211207	0.117331	0.229738	0.268446	0.176624	0.0565322	0.20921	0.225687	0.265188	0.127577	0.0690214	0.178943	0.207849	0.224017	0.263199	0.127024	0.0688833	0.177915
Botrytis cinerea	40559	0.0328237	0.0455767	0.0316399	0.0172084
Wallemia ichthyophaga	245174	0.0263232	0.0371005	0.00935904	0.0070432
Glomus cerebriforme	658196	0.0784362	0.100097	0.0453077	0.0238915	0.097139	0.0906443	0.0752681	0.0452937	0.0197104	0.09865	0.0781707	0.090778	0.0410163	0.0103854	0.0963521
Leptospira yasudae	2484905	1.12051	1.02724	0.542776	0.229461	1.00095	1.10207	1.21806	0.463058	0.217103	0.991421	1.4044	1.31795	0.433087	0.200089	0.77286	0.948054	1.3841	1.31953	0.429157	0.199524	0.761078	0.924561	0.394215	1.31894	1.28332	0.745643	0.184443	0.90371	1.33256	1.24808	0.465811	0.202734	0.732179	0.890448	1.30734	1.22579	0.461915	0.20206	0.722754	0.857377	1.24782	0.42002	1.17169	0.191807	0.700058	0.815066	1.17227	0.414359
Mesorhizobium sp. Primo-A	2496780	3.2824	4.54488	1.23711	0.36376	4.7951	3.61487	3.16399	1.00436	0.34599	4.643	3.68451	4.87339	0.894408	0.314685	2.11359	4.38279	3.62098	4.8805	0.882188	0.310694	2.06624	4.22024	0.804946	3.36965	4.70527	2.00515	0.274231	4.07637	3.45328	4.52886	1.01844	0.311296	1.92853	3.98502	3.36918	4.42485	1.00554	0.309897	1.89241	3.75959	3.1766	0.853618	4.16439	0.295172	1.80432	3.47439	2.93069	0.845378
Micromonas commoda	296587	0.0389806	0.0402869	0.0274541	0.0104724
Clostridium botulinum	1491	0.145159	0.132553	0.101533	0.0532328	0.11986	0.158902	0.134986	0.105728	0.0451923	0.117962	0.158797	0.162062	0.0949791	0.0466891	0.120907	0.118589	0.157788	0.162105	0.0945154	0.0430752	0.120152	0.117414	0.0849636	0.157732	0.160345	0.119187	0.0416223
Aliarcobacter skirrowii	28200	0.252199	0.246345	0.178453	0.0740864	0.259677	0.214441	0.300858	0.143983	0.0731656	0.257042	0.318928	0.252123	0.13527	0.0549149	0.186961	0.24817	0.316886	0.25222	0.134612	0.0572961	0.185769	0.245379	0.127603	0.312386	0.249274	0.184157	0.0439673	0.24296	0.310246	0.246343	0.138595	0.0620943	0.1867	0.24128	0.307599	0.244548	0.137966	0.0619898	0.185653
Thermoprotei archaeon ex4572_64	2012533	0.179612	0.144349	0.0736634	0.0458944	0.127927	0.183471	0.170476	0.0653264	0.0483945	0.129543	0.180142	0.193271	0.0722513	0.030837	0.152508	0.125879	0.178959	0.193334	0.0719624	0.0320946	0.15154	0.124772	0.0617155	0.179241	0.191283	0.150186	0.034343
Caballeronia temeraria	1777137	0.109583	0.135799	0.0653646	0.0239952	0.135132	0.0994654	0.134151	0.0603258	0.0198499	0.132617	0.15195	0.11434	0.0540543	0.0153831	0.0643241	0.132878	0.150989	0.114496	0.0538047	0.0106948	0.0639145
Stereum hirsutum	40492	0.0848124	0.0694746	0.0274201	0.024011	0.0679732	0.074555	0.0806603	0.0410842	0.0159187
Mycobacterium tuberculosis	1773	96.4278	127.1	30.7863	2.99034	130.033	105.351	97.337	23.2739	2.56133	125	117.571	150.273	20.0789	2.04721	48.7317	118.622	115.182	150.532	19.5939	1.95477	47.3508	113.723	16.007	107	144.534	45.5674	1.49861	109.364	109.325	138.542	23.9113	2.05309	43.5762	106.609	106.293	134.96	23.4325	2.0282	42.514	99.7771	99.2322	18.4622	126.114	1.71123	39.9585	91.1707	90.2957	17.7874
Marivirga lumbricoides	1046115	0.0293519	0.0341209	0.0138176	0.0104998
Epulopiscium sp. SCG-B11WGA-EpuloA1	1710701	0.157048	0.112698	0.0923279	0.0497163	0.116254	0.150941	0.145853	0.07588	0.0497904	0.117488	0.158811	0.167896	0.0718314	0.0427227	0.114248	0.11413	0.157787	0.167928	0.0715465	0.0444995	0.113509
Mycobacterium angelicum	470074	0.549762	0.48698	0.328644	0.168207	0.4785	0.5364	0.577316	0.294356	0.158627	0.478103	0.643617	0.606679	0.281149	0.136446	0.436451	0.454015	0.637707	0.607116	0.279331	0.143314	0.431829	0.446408	0.260956	0.621783	0.596033	0.425831	0.129959	0.439907	0.622259	0.585021	0.294773	0.147546	0.418732	0.435544	0.613987	0.577982	0.293002	0.147134	0.415023	0.424876	0.594824	0.273131	0.560092	0.138628	0.405942	0.410776	0.569811	0.270295
Porphyromonas gingivalis	837	0.795902	0.703731	0.385298	0.189749	0.677468	0.775415	0.857747	0.339608	0.179374	0.666872	0.977813	0.920867	0.322039	0.166661	0.539054	0.647053	0.96602	0.921734	0.31973	0.164979	0.532463	0.633966	0.300339	0.921982	0.900182	0.523759	0.151255	0.62252	0.930121	0.878613	0.339769	0.168422	0.522138	0.614962	0.914748	0.865438	0.337526	0.167921	0.516729	0.596398	0.879075	0.312274	0.832778	0.160156	0.503558	0.572374	0.8333	0.308627
Oxytricha trifallax	1172189	0.102928	0.0946262	0.0646954	0.0204581	0.101088	0.0876349	0.115046	0.0506986	0.019636	0.102685	0.12304	0.0807037	0.04581	0.0152531	0.095429
Streptomyces auratus	114687	0.943437	0.860663	0.405711	0.188012	0.813319	0.959748	0.985302	0.35388	0.177557	0.803971	1.11843	1.12714	0.338677	0.161843	0.649532	0.786553	1.10398	1.12824	0.336145	0.15822	0.640569	0.768697	0.307938	1.05404	1.0995	0.628811	0.146729	0.75335	1.0605	1.07019	0.355418	0.163638	0.623836	0.743001	1.04192	1.05291	0.352996	0.163162	0.616556	0.717936	0.998728	0.324887	1.0097	0.154514	0.598923	0.685641	0.943449	0.321399
Candidatus Rokubacteria bacterium	2053607	0.0504616	0.0286258	0.00944241	0.000344544
Paraclostridium benzoelyticum	1629550	0.398285	0.376678	0.253697	0.117197	0.36556	0.413845	0.406095	0.228132	0.106398	0.363564	0.440407	0.455025	0.221488	0.0873606	0.338364	0.355965	0.437141	0.455326	0.220314	0.084775	0.335412	0.351222	0.20244	0.428826	0.44793	0.331564	0.0723408	0.346989	0.427354	0.440448	0.22954	0.0921329	0.328346	0.344181	0.422894	0.435954	0.228399	0.091942	0.32594	0.337235	0.412537	0.217621	0.424754	0.0781148	0.319978	0.328095	0.39899	0.215854
Afifella marina	1080	0.0389238	0.0289694	0.0138217	0.0171895
Caulochytrium protostelioides	1555241	0.0652707	0.0484805	0.0270986	0.000496277
Fusarium oxysporum	5507	0.0475899	0.0405029	0.0316409	0.0105902
Tetrahymena thermophila	5911	0.19183	0.18758	0.158921	0.0750413	0.179333	0.188562	0.216356	0.131042	0.0791713	0.179779	0.239398	0.197386	0.121384	0.0640913	0.190349	0.174123	0.237896	0.19743	0.120813	0.0667164	0.189118	0.17238	0.120251	0.234532	0.195186	0.18743	0.0494933	0.170785	0.233994	0.193044	0.130222	0.064239	0.186601
Xanthomonas oryzae	347	0.269	0.232162	0.14414	0.0674674	0.237561	0.248021	0.268482	0.128121	0.0646366	0.231624	0.285856	0.270219	0.114499	0.051205	0.250972	0.223947	0.284033	0.270332	0.113939	0.0532798	0.249165	0.221537	0.108956	0.279819	0.26702	0.246778	0.0410085	0.219434	0.277554	0.263701	0.122665	0.0523016	0.246385	0.217973	0.275321	0.261675	0.122135	0.0522393	0.244881
Cavenderia fasciculata	261658	0.127721	0.129549	0.0683052	0.0490284	0.119028	0.144965	0.117442	0.0591941	0.0525702	0.124956	0.137215	0.139045	0.0626024	0.0514835	0.0875416	0.121431	0.136396	0.139075	0.0623638	0.0535542	0.0869288
Bacillus cereus	1396	17.5779	21.9014	5.05071	0.79557	21.9799	19.3429	17.5639	3.77122	0.726353	21.3714	21.2844	25.903	3.24833	0.643009	9.61739	20.5367	20.8607	25.9457	3.18061	0.615617	9.35521	19.7091	2.6504	19.4386	24.9321	9.01825	0.533328	18.9648	19.7523	23.9133	3.8298	0.626469	8.68001	18.4973	19.2158	23.3076	3.76199	0.621808	8.47844	17.337	17.966	3.03579	21.8031	0.566996	7.9932	15.8788	16.385	2.95542
Propionibacterium phage PacnesP1	1983620	0.0489253	0.032155	0.000495684	0.00034357
Paenibacillus tyrfis	1501230	40.5316	61.6951	14.0183	1.57832	64.3927	47.4415	38.1185	11.0524	1.38703	61.3748	45.8574	73.7781	9.69136	1.15903	17.5097	58.0792	44.9369	73.9078	9.46515	1.11762	17.0229	55.7	7.90596	41.4507	70.9695	16.3931	0.8856	53.5628	42.944	68.0354	11.5211	1.16393	15.5436	52.2187	41.7608	66.2815	11.2988	1.15163	15.1723	48.8868	39.0052	8.98263	61.9505	0.992782	14.2795	44.6927	35.5159	8.68574
Bacteroidales bacterium Barb4	1633200	0.0794792	0.0323138	0.0939807	0.0330676	0.027633	0.0798125	0.0775374	0.0801701	0.033291
Stentor coeruleus	5963	0.113352	0.0950021	0.0816768	0.0274802	0.0891895	0.118991	0.105359	0.0778592	0.0235784	0.091159	0.106821	0.123398	0.0787219	0.0202658	0.0856944
Neisseria meningitidis	487	0.580475	0.550463	0.348214	0.166078	0.532235	0.599548	0.584388	0.313753	0.157104	0.534241	0.6596	0.667015	0.297791	0.140932	0.456159	0.517219	0.653438	0.667538	0.295787	0.139894	0.451186	0.508134	0.263548	0.635846	0.654453	0.444669	0.138907	0.500191	0.63656	0.641257	0.312089	0.145109	0.437414	0.494934	0.627967	0.633189	0.310168	0.144723	0.433408	0.48197	0.608003	0.281808	0.613025	0.14216	0.423631	0.465074	0.582125	0.275739
Bacillus pseudomycoides	64104	2.19322	2.04134	0.848904	0.303159	1.98204	2.1884	2.30981	0.688626	0.290483	1.95473	2.77349	2.70607	0.634487	0.266878	1.37097	1.87626	2.7263	2.71087	0.626749	0.263317	1.344	1.81687	0.561763	2.59013	2.62015	1.30885	0.243883	1.76389	2.61452	2.53148	0.692741	0.267275	1.26861	1.73067	2.55411	2.47621	0.685323	0.266216	1.24767	1.64737	2.41457	0.608299	2.34362	0.252834	1.19692	1.54231	2.23726	0.598819
Mucilaginibacter hurinus	2201324	1.49657	1.43552	0.634362	0.263637	1.37611	1.53696	1.56703	0.528724	0.254042	1.36422	1.84757	1.87731	0.493671	0.236785	0.969829	1.32394	1.81791	1.87947	0.488638	0.232577	0.953259	1.2855	0.444383	1.73572	1.822	0.931667	0.218059	1.25302	1.7439	1.76564	0.531591	0.235581	0.91254	1.23138	1.70736	1.73077	0.526735	0.234744	0.899464	1.17878	1.6226	0.477786	1.64535	0.2237	0.86777	1.1116	1.51506	0.469198
Virgibacillus profundi	2024555	1.94508	1.70718	0.476394	0.202414	1.64886	1.82023	2.06465	0.386701	0.195008	1.64467	2.52163	2.1845	0.364501	0.174277	1.09335	1.54635	2.48028	2.18828	0.36159	0.17272	1.07388	1.50042	0.329732	2.31757	2.11799	1.04812	0.161254	1.45814	2.35221	2.04879	0.386084	0.177181	1.04486	1.43261	2.3	2.00588	0.383275	0.176639	1.02857	1.36708	2.17656	0.353977	1.90316	0.166347	0.989612	1.28472	2.02029	0.350634
Bacillus sp. SRB_28	1969378	0.474744	0.419577	0.257569	0.132569	0.406542	0.466018	0.499324	0.215343	0.131591	0.408671	0.555225	0.509636	0.207051	0.116542	0.372702	0.397477	0.550558	0.509992	0.205965	0.115175	0.369207	0.391614	0.195433	0.533012	0.501472	0.364644	0.105517	0.386426	0.537788	0.492843	0.215148	0.11909	0.360579	0.382979	0.53124	0.487635	0.214092	0.118799	0.357734	0.374478	0.516118	0.204762	0.474516	0.109086	0.350729	0.363326	0.496287	0.202547
Chlorella variabilis	554065	0.0385928	0.054741	0.0183539	0.0070432
Plasmodium reichenowi	5854	5.6302	7.36243	2.24518	0.491826	7.52071	6.3502	5.38548	1.82787	0.457922	7.22054	6.38944	9.08291	1.6432	0.408631	3.05943	6.9398	6.26916	9.1	1.61281	0.396661	2.98528	6.6702	1.42117	5.80506	8.7567	2.88919	0.342017	6.43266	5.9732	8.40897	1.87622	0.407994	2.77729	6.28218	5.82016	8.20523	1.84802	0.405666	2.72026	5.90976	5.46347	1.5655	7.69755	0.367376	2.58335	5.43864	5.01211	1.52471
Human endogenous retrovirus	11827	0.299562	0.274162	0.123241	0.0598077	0.260075	0.307731	0.283474	0.106905	0.0603247	0.261629	0.300594	0.337696	0.10016	0.0467133	0.238789	0.252056	0.298532	0.337868	0.0996614	0.0486002	0.237042	0.249061	0.0889746	0.2943	0.333511	0.234791	0.0486246	0.246454	0.293201	0.32906	0.106546	0.0481613	0.232916	0.244646	0.290642	0.326367	0.106101	0.0481254	0.231504
Chitinophagaceae bacterium	1869212	0.023933	0.039902	0.0274257	0.0241122
Saccharomyces cerevisiae	4932	0.155457	0.173833	0.0794767	0.0418735	0.15161	0.179555	0.161952	0.0741077	0.0361607	0.156973	0.185023	0.202562	0.0758311	0.0256204	0.0854062	0.156598	0.18384	0.202624	0.075509	0.0213821	0.0848545	0.155041	0.0650868	0.181772	0.20024	0.0842561	0.0207569
Moraxella catarrhalis	480	0.0406622	0.0678428	0.121091	0.0266334	0.0776	0.0455207	0.0532536	0.105142	0.0217119
Pseudomonas daroniae	2487519	0.649639	0.593294	0.334606	0.155941	0.571451	0.634414	0.701384	0.293852	0.146291	0.57454	0.792911	0.695953	0.274979	0.134271	0.471488	0.564592	0.784537	0.696501	0.273247	0.130764	0.466216	0.554152	0.256024	0.752656	0.682345	0.459348	0.115961	0.544971	0.761549	0.667727	0.292691	0.133733	0.454523	0.538836	0.750217	0.659296	0.290988	0.133417	0.450241	0.523812	0.723855	0.268221	0.638267	0.125128	0.439795	0.504386	0.689731	0.266221
Enterobacter hormaechei	158836	47.8919	68.8145	15.2855	1.61423	71.2196	54.8315	46.2458	11.6887	1.40357	68.4827	55.8399	78.987	10.0073	1.16864	23.7333	64.8806	54.7097	79.1244	9.77233	1.12156	23.0704	62.2097	8.12885	50.5872	75.9793	22.2119	0.881261	59.8346	52.0494	72.8426	12.0363	1.15735	21.1467	58.331	50.6108	70.9659	11.8025	1.14512	20.6374	54.6053	47.2641	9.23804	66.3258	0.999782	19.4123	49.9149	43.0298	8.97177
Chlamydomonas eustigma	1157962	0.0723247	0.115702	0.0412062	0.0206754	0.111466	0.0919223	0.0700099	0.0321402	0.0238006	0.109557	0.0786275	0.110049	0.0334599	0.0201681	0.0420751
Piscirickettsia salmonis	1238	5.0505	6.90056	1.9984	0.480468	7.11719	5.55999	5.07671	1.58716	0.453084	6.79722	6.04234	8.03171	1.43223	0.403394	2.82415	6.45137	5.92983	8.04518	1.40725	0.396511	2.75639	6.20365	1.23333	5.53225	7.74284	2.66878	0.350156	5.98323	5.6449	7.44002	1.63285	0.403734	2.57507	5.84385	5.50128	7.26046	1.6092	0.401519	2.52299	5.49895	5.1659	1.34514	6.81415	0.375087	2.39786	5.06383	4.74248	1.30515
Gonapodya prolifera	1123529	0.0690437	0.0606332	0.0375247	0.0138834	0.0605523	0.0791203	0.0543465	0.0330682	0.0119832
Plasmodium gonderi	77519	0.0239996	0.0457146	0.0184766	0.0171937
Pseudo-nitzschia multistriata	183589	0.31107	0.276042	0.206413	0.116228	0.265379	0.305959	0.317621	0.192526	0.111001	0.269407	0.320616	0.322396	0.196247	0.0958582	0.274092	0.268042	0.318632	0.322547	0.195207	0.0925153	0.272068	0.264925	0.189802	0.311228	0.318241	0.26939	0.0730622	0.262018	0.312485	0.313892	0.200594	0.0994122	0.266794	0.260173	0.309784	0.311204	0.199671	0.0991946	0.265133	0.255429	0.303282	0.193106	0.304907	0.0866702	0.261056
Microcystis aeruginosa	1126	0.192795	0.21309	0.142583	0.0721037	0.203369	0.202931	0.193399	0.144159	0.0658691	0.208244	0.213456	0.207128	0.129716	0.0578349	0.177995	0.201876	0.212077	0.2072	0.129096	0.060193	0.1769	0.199761	0.131384	0.209889	0.204875	0.175433	0.034727	0.198057	0.206409	0.202513	0.138943	0.058862	0.177681	0.196806	0.20495	0.201022	0.138331	0.0587683	0.176706
Criibacterium bergeronii	1871336	0.03556	0.0744467	0.0273001	0.0171608	0.0708502	0.0611917	0.0249722	0.0364206	0.00813684
Bovine retrovirus CH15	1822365	0.0415239	0.0372759	0.0183536	0.0103973
Diaporthe helianthi	158607	0.0387026	0.0313001	0.00934479	0.010383
Torque teno mini virus 10	2065036	0.0217607	0.0146958	0.0534753	0.0278194
Rhynchosporium agropyri	914238	0.405857	0.432899	0.238373	0.112506	0.445529	0.399371	0.409094	0.216988	0.103078	0.436071	0.445832	0.463313	0.210007	0.0763166	0.336584	0.415733	0.442544	0.463612	0.208908	0.0795068	0.333663	0.409297	0.192113	0.431674	0.456487	0.329778	0.0709222	0.403776	0.432678	0.449282	0.218055	0.0867633	0.326783	0.400063	0.428201	0.444824	0.217002	0.0865897	0.324388	0.390992	0.41742	0.203226	0.4333	0.0776648	0.318574	0.378943	0.403703	0.201413
Lactococcus garvieae	1363	0.0746249	0.0488769	0.041089	0.0173197	0.0488278	0.0658742	0.0795551	0.032071	0.0160573
Bacillus licheniformis	1402	0.130819	0.117894	0.0864743	0.0417407	0.118294	0.138414	0.116883	0.0679464	0.0483203	0.115646	0.119158	0.136506	0.0658927	0.0470009	0.142447	0.117264	0.118282	0.136507	0.0655805	0.0428429	0.141586
Mammaliicoccus sciuri	1296	0.763652	0.667131	0.394139	0.16832	0.647866	0.744253	0.809145	0.343803	0.15689	0.645849	0.918114	0.870672	0.322298	0.139151	0.537233	0.622479	0.907763	0.871457	0.319943	0.137586	0.53068	0.610138	0.297389	0.875366	0.851657	0.522101	0.119223	0.599344	0.876344	0.831943	0.345403	0.141867	0.51803	0.592247	0.862285	0.819751	0.34304	0.141458	0.512693	0.574762	0.829656	0.316857	0.789446	0.12931	0.499702	0.55209	0.787672	0.313953
Lactobacillus crispatus	47770	74.5032	106.243	23.0232	2.41656	109.56	84.7395	72.5345	17.1585	2.1377	105.369	87.3514	121.383	15.0299	1.7058	38.4949	100.098	85.5782	121.589	14.6691	1.62749	37.4128	95.9693	12.1753	79.1244	116.744	36.0065	1.26008	92.2871	81.2128	111.913	17.6538	1.72027	34.3722	89.963	78.9553	109.017	17.3092	1.70028	33.5365	84.1995	73.7217	13.879	101.882	1.43156	31.5283	76.9462	67.0949	13.417
Zancudomyces culisetae	1213189	0.03556	0.0257357	0.0227287	0.00036137
Bifiguratus adelaidae	1938954	0.0472556	0.0521031	0.0139686	0.0104963
Crocosphaera chwakensis	2546361	1.71444	1.58667	0.772494	0.28013	1.54985	1.70746	1.80968	0.640563	0.266982	1.5115	2.07203	2.22416	0.603568	0.243108	1.06845	1.43151	2.03803	2.22829	0.596741	0.243245	1.04948	1.3907	0.529908	1.92888	2.15682	1.02467	0.228427	1.35237	1.95292	2.08599	0.647904	0.250741	1.0025	1.32935	1.91059	2.04244	0.641151	0.249734	0.98751	1.27053	1.81276	0.573123	1.93788	0.235814	0.951118	1.19628	1.68871	0.559398
Gigaspora rosea	44941	0.429558	0.464995	0.304475	0.154884	0.466534	0.443015	0.42895	0.272563	0.153708	0.458073	0.456108	0.510457	0.268484	0.138711	0.351364	0.445898	0.452714	0.510794	0.266782	0.137592	0.348203	0.438829	0.251529	0.441258	0.502252	0.34403	0.124427	0.432611	0.44329	0.493542	0.276285	0.143846	0.339287	0.428484	0.438614	0.488302	0.274714	0.143465	0.336724	0.418297	0.427486	0.261492	0.475218	0.132779	0.330474	0.404984	0.413196	0.257313
Symbiodinium microadriaticum	2951	5.15766	7.21012	1.78923	0.427074	7.4535	5.59601	5.26168	1.43855	0.396351	7.14159	6.29288	8.11002	1.28531	0.354408	2.63482	6.7378	6.17545	8.12396	1.26426	0.348649	2.57339	6.48002	1.09303	5.78216	7.81991	2.49293	0.309592	6.24815	5.88241	7.51418	1.47005	0.355579	2.41426	6.10201	5.73201	7.33142	1.44922	0.353733	2.36587	5.73999	5.38109	1.19797	6.88078	0.332686	2.25032	5.28469	4.93769	1.17115
Tetrasphaera japonica	99481	0.602854	0.964961	0.441597	0.284852	1.09258	0.627364	0.524902	0.499458	0.284123	1.06237	0.513689	0.809324	0.493414	0.291297	0.45055	1.04158	0.509748	0.809864	0.488753	0.28572	0.445573	1.01309	0.501275	0.473494	0.791283	0.439019	0.249453	0.989255	0.494807	0.771799	0.532583	0.282423	0.431514	0.972892	0.488656	0.760983	0.527526	0.28168	0.427533	0.933936	0.473749	0.476494	0.733874	0.277153	0.417906	0.88398	0.454779	0.468325
Syncephalis pseudoplumigaleata	1712513	0.0209939	0.0343187	0.0274215	0.0103973
Staphylococcus saprophyticus	29385	0.0273255	0.0352032	0.0139996	0.00715224
Planctomycetes bacterium	2026780	0.18811	0.19517	0.0923834	0.0525387	0.199883	0.172932	0.19821	0.0867754	0.0483709	0.194977	0.205339	0.214101	0.0828973	0.0358489	0.133205	0.189045	0.204049	0.214179	0.0825235	0.0372879	0.132405	0.187112	0.0783637	0.201183	0.211793	0.131266	0.0277454	0.185481	0.198021	0.209325	0.0872604	0.0379906	0.136078
Pseudoalteromonas luteoviolacea	43657	22.4998	29.789	8.94075	1.04628	30.6793	24.3577	22.7935	7.02711	0.927663	29.2897	27.5564	36.0736	6.14053	0.7648	11.2005	27.7462	27.0025	36.1323	6.00165	0.743211	10.8956	26.62	4.92559	25.1335	34.7089	10.4985	0.608564	25.6087	25.6545	33.2809	7.23898	0.780587	10.073	24.9732	24.9551	32.434	7.10252	0.773433	9.83682	23.3961	23.3219	5.6396	30.3279	0.676831	9.26774	21.4113	21.2535	5.43728
Oltmannsiellopsis viridis	51324	0.184557	0.155091	0.108282	0.049579	0.170427	0.154392	0.202505	0.087051	0.0450968	0.165672	0.212284	0.16606	0.0782257	0.0417669	0.154827	0.160425	0.210836	0.166094	0.0778904	0.0434647	0.153824	0.158823	0.0738618	0.210794	0.164207	0.152425	0.0352657
[truncated: 9 more columns]
