# Supplementary material for: Respiratory microbiome dysbiosis and temporal dynamics in individuals with asthma.
Source: Research Square preprint supplement (doi:10.21203/rs.3.rs-1580980/v1), 2022-05-10
Supplement: Supplementary file 2 [file read me DMM clusters.docx]

Folder contains the probabilistic membership assignment for all the species incidence levels. Rows are samples, and columns are cluster number V1-V6 etc, and value 1 means it belongs to that cluster, and less than 1 (usually close to 0) mean it is not. There would be rare case of them not having 1 but 0.7 etc, but you can set cut off for those with >0.5 as being 1 etc.
