# Supplementary material for: Respiratory microbiome dysbiosis and temporal dynamics in individuals with asthma.
Source: Research Square preprint supplement (doi:10.21203/rs.3.rs-1580980/v1), 2022-05-10
Supplement: Supplementary file 3 [file Supplementary data File 6.xlsx]

## Sheet: demo
variable	control (n=13)	case (n=17)	p-value
center, n (%)			0.676
GR	5 (38.46)	9 (52.94)
PO	8 (61.54)	8 (47.06)
age group, n (%)			0.201
U18	8 (61.54)	15 (88.24)
O18	5 (38.46)	2 (11.76)
sex, n (%)			0.575
M	7 (53.85)	12 (70.59)
F	6 (46.15)	5 (29.41)
season, n (%)			0.326
spring	13 (100)	14 (82.35)
summer	0 (0)	3 (17.65)

## Sheet: epidemiol
variable	control (n=13)	case (n=17)	p-value
Allergic reaction to latex, n (%)			0.588
no	13 (100)	15 (88.24)
yes	0 (0)	2 (11.76)
Adverse reaction to bee or wasp stings, n (%)			0.407
no	9 (69.23)	15 (88.24)
yes	4 (30.77)	2 (11.76)
Adverse reaction to foods, n (%)			0.054
no	12 (92.31)	9 (52.94)
yes	1 (7.69)	8 (47.06)
Severe anaphylaxis food, n (%)			1
no	1 (100)	6 (75)
yes	0 (0)	2 (25)
Severe anaphylaxis, n (%)			0.626
no	12 (100)	15 (88.24)
yes	0 (0)	2 (11.76)
Infections, n (%)			1
no	2 (15.38)	2 (11.76)
yes	11 (84.62)	15 (88.24)
Upper resp infections last 12mths, median (25 - 75 percentiles)	2 (1.5 - 3)	2 (1 - 4)	0.768
Max duration upper resp infections last 12 mths, median (25 - 75 percentiles)	7 (3.5 - 8.5)	4 (3.5 - 10.5)	0.792
Lower resp infections last 12 mths, median (25 - 75 percentiles)	0 (0 - 0)	0 (0 - 0)	0.316
Max duration lower resp infections last 12 mths, median (25 - 75 percentiles)	0 (0 - 0)	0 (0 - 0)	0.424
Otitis media last 12 mths, median (25 - 75 percentiles)	0 (0 - 0)	0 (0 - 0)	0.686
Max duration otitis media last 12 mths, median (25 - 75 percentiles)	0 (0 - 0)	0 (0 - 7)	0.669
Gi infections last 12 mths, median (25 - 75 percentiles)	0 (0 - 1)	0 (0 - 1)	0.766
Max duration gi infections last 12 mths, median (25 - 75 percentiles)	2 (1 - 2.5)	2 (1 - 3)	0.942
Antibiotic courses last 12 mths, median (25 - 75 percentiles)	0 (0 - 1)	0 (0 - 1)	0.841
Max duration antibiotic courses last 12 mths, median (25 - 75 percentiles)	3 (0 - 7)	0 (0 - 7)	0.85
Pneumococcal doses, median (25 - 75 percentiles)	0 (0 - 4)	2 (0 - 4)	0.518
H Influenza doses, median (25 - 75 percentiles)	0 (0 - 4)	3 (0 - 4)	0.394
Influenza doses, median (25 - 75 percentiles)	0 (0 - 0)	0 (0 - 0)	0.897
Vigorous Physical activity per week, n (%)			0.115
Never or occasionally	1 (7.69)	7 (41.18)
Once/twice	8 (61.54)	6 (35.29)
Three or more times	4 (30.77)	4 (23.53)
TV attendance (hours/day), n (%)			0.3
<1h	4 (30.77)	1 (5.88)
1h but <3h	5 (38.46)	7 (41.18)
>3h but <5h	3 (23.08)	6 (35.29)
>5h	1 (7.69)	3 (17.65)
Paternal Education level (higher), n (%)	7 (53.85)	6 (35.29)	0.474
Maternal Education level (higher), n (%)	9 (69.23)	6 (35.29)	0.057
Patient ever smoked, n (%) yes	4 (30.77)	1 (5.88)	0.187
About how many cigarettes each day number of cigarettes , median (25 - 75 percentiles)	8.5 (5.25 - 11.75)	8 (8 - 8)	1
If less about how many cigarettes per week number of cigarettes , median (25 - 75 percentiles)	1 (1 - 4.5)	0 (0 - 0)	0.346
About how many years , median (25 - 75 percentiles)	1.5 (0.9 - 4)	4 (4 - 4)	0.8
Patient smoker, n (%) yes	2 (16.67)	1 (5.88)	0.749
no	10 (83.33)	16 (94.12)
Mothersmoke, n (%) yes	4 (30.77)	7 (41.18)	0.838
no	9 (69.23)	10 (58.82)
Number of cigarettes mother smokes, median (CI)	10 (9.5 - 11.25)	5 (3 - 9.25)	0.193
Father smoker, median, n (%) yes	3 (23.08)	7 (43.75)	0.44
no	10 (76.92)	9 (56.25)
Number of cigarettes father smokes, median (CI)	15 (12.5 - 17.5)	5 (3 - 15)	0.362
Number of cigarettes smoked at home, median (CI)	0 (0 - 0)	0 (0 - 0)	0.697
Exposure to traffic pollution, n (%)			0.591
Never	6 (46.15)	6 (35.29)
Seldom	6 (46.15)	7 (41.18)
Frequently	1 (7.69)	2 (11.76)
Almost whole day	0 (0)	2 (11.76)
Mold spots or window condensation (yes), n (%) yes	8 (61.54)	13 (76.47)	0.63
no	5 (38.46)	4 (23.53)
Pet ownership (yes), n (%)	8 (61.54)	6 (35.29)	0.29
any atopic disease father, n (%)			0.152
no	11 (84.62)	9 (52.94)
yes	2 (15.38)	8 (47.06)
any atopic disease mother, n (%)			0.421
no	11 (84.62)	11 (64.71)
yes	2 (15.38)	6 (35.29)
any atopic disease siblings, n (%)			0.26
no	11 (84.62)	10 (58.82)
yes	2 (15.38)	7 (41.18)
any atopic disease family, n (%)			0.165
no	8 (61.54)	5 (29.41)
yes	5 (38.46)	12 (70.59)

## Sheet: Allergy_SPT
variable	control (n=13)	case (n=17)	p-value
Height, median (25 - 75 percentiles)	165 (154 - 176)	165 (143 - 175)	0.63
Weight, median (25 - 75 percentiles)	56 (51 - 60)	62 (35 - 71)	0.917
Spt Normal.saline, median (25 - 75 percentiles)	0 (0 - 0)	0 (0 - 0)	1
Spt Histamine, median (25 - 75 percentiles)	5 (4 - 6)	7 (5 - 8)	0.041
Spt Der Pt, median (25 - 75 percentiles)	0 (0 - 0)	0 (0 - 4)	0.055
Spt Der Far, median (25 - 75 percentiles)	0 (0 - 0)	0 (0 - 6)	0.011
Spt Cockroach, median (25 - 75 percentiles)	0 (0 - 0)	0 (0 - 0)	1
Spt Cat, median (25 - 75 percentiles)	0 (0 - 0)	3 (0 - 7)	0.005
Spt Alternaria, median (25 - 75 percentiles)	0 (0 - 0)	0 (0 - 0)	0.333
Spt Grass mix, median (25 - 75 percentiles)	0 (0 - 0)	3 (0 - 5)	0.003
Spt Cypress, median (25 - 75 percentiles)	0 (0 - 0)	0 (0 - 0)	1
Spt Birch, median (25 - 75 percentiles)	0 (0 - 0)	0 (0 - 7)	0.021
Spt Parietaria, median (25 - 75 percentiles)	0 (0 - 0)	5 (0 - 8)	0.032
Spt Artemisia, median (25 - 75 percentiles)	0 (0 - 0)	0 (0 - 0)	0.42
Spt Olive, median (25 - 75 percentiles)	0 (0 - 0)	0 (0 - 10)	0.641
Spt Other, median (25 - 75 percentiles)	0 (0 - 0)	3 (0 - 3)	0.019
sum spt test, median (25 - 75 percentiles)	0 (0 - 4)	32 (14 - 35)	<0.001
any positive spt test, n (%)			0.004
no	9 (69.23)	2 (11.76)
yes	4 (30.77)	15 (88.24)

## Sheet: Lung_spiro
variable	control (n=13)	case (n=17)	p-value
FeNO 1st attempt, mean±SD	9.69±7.92	15.29±13.84	0.174
FeNO 2nd attempt, mean±SD	10±7.33	15.88±14.19	0.153
Pre pef absolute, mean±SD	6.8±2.4	6.17±2.73	0.504
Pre pef predicted, mean±SD	95.88±11.85	100.03±26.83	0.574
Pre pef zscore, mean±SD	-0.39±0.8	0.07±1.87	0.376
Pre fvc absolute, mean±SD	3.79±1.27	3.65±1.49	0.791
Pre fvc predicted, mean±SD	103.13±12.28	104.82±16.58	0.751
Pre fvc zscore, mean±SD	0.13±1.26	0.35±1.52	0.678
Pre fev1 absolute, mean±SD	3.22±1.08	2.86±1.03	0.373
Pre fev1 predicted, mean±SD	102.82±10.34	101.02±18.18	0.735
Pre fev1 zscore, mean±SD	0.07±0.93	0.32±1.85	0.635
Pre fef50 absolute, mean±SD	3.65±1.16	3.26±1.12	0.363
Pre fef50 predicted, mean±SD	86.81±13.8	90.16±30.99	0.694
Pre fef50 zscore, mean±SD	-0.35±0.95	-0.2±2.4	0.814
Post pef absolute, mean±SD	7.18±2.81	6.68±2.95	0.645
Post pef predicted, mean±SD	100.45±14.73	106.52±24.3	0.405
Post pef zscore, mean±SD	0.16±1.06	0.49±1.62	0.513
Post fvc absolute, mean±SD	3.8±1.27	3.67±1.51	0.804
Post fvc predicted, mean±SD	103.17±11.57	105.36±16.17	0.669
Post fvc zscore, mean±SD	0.11±1.29	0.42±1.54	0.56
Post fev1 absolute, mean±SD	3.34±1.16	3.07±1.11	0.526
Post fev1 predicted, mean±SD	106.26±11.17	107.53±17.12	0.808
Post fev1 zscore, mean±SD	0.37±1.01	0.43±1.58	0.885
Post fef50 absolute, mean±SD	4.31±1.87	3.9±1.2	0.498
Post fef50 predicted, mean±SD	99.31±22.48	106.81±32.57	0.462
Post fef 50zscore, mean±SD	0.2±1.28	0.71±2.34	0.45
