# Supplementary material for: Respiratory microbiome dysbiosis and temporal dynamics in individuals with asthma.
Source: Research Square preprint supplement (doi:10.21203/rs.3.rs-1580980/v1), 2022-05-10
Supplement: Supplementary file 4 [file Supplementary data File 7.xlsx]

## Sheet: Sheet1
Subject	Health status	Geographical Location	Sex	Age
102	Asthma	Greece	Male	9
105	Asthma	Greece	Male	9
106	Asthma	Greece	Male	14
107	Healthy	Greece	Female	12
108	Healthy	Greece	Female	12
109	Asthma	Greece	Male	8
110	Asthma	Greece	Female	12
111	Asthma	Greece	Male	8
113	Healthy	Greece	Male	11
114	Healthy	Greece	Male	8
115	Healthy	Greece	Female	12
116	Asthma	Greece	Male	9
117	Asthma	Greece	Male	5
119	Asthma	Greece	Male	14
302	Asthma	Poland	Male	17
303	Healthy	Poland	Female	6
310	Asthma	Poland	Male	15
312	Asthma	Poland	Male	17
317	Asthma	Poland	Male	36
318	Asthma	Poland	Female	17
319	Healthy	Poland	Female	38
326	Healthy	Poland	Male	18
327	Asthma	Poland	Female	17
328	Asthma	Poland	Female	25
329	Asthma	Poland	Female	15
330	Healthy	Poland	Male	24
331	Healthy	Poland	Male	18
332	Healthy	Poland	Female	17
333	Healthy	Poland	Male	16
334	Healthy	Poland	Male	18
