# Supplementary material for: Respiratory microbiome dysbiosis and temporal dynamics in individuals with asthma.
Source: Research Square preprint supplement (doi:10.21203/rs.3.rs-1580980/v1), 2022-05-10
Supplement: Supplementary file 5 [file Supplementary data File 8.xlsx]

## Sheet: Sheet2
TaxaID	Lineage	102_B0_D	102_B1_D	102_B2_D	102_F1_D	102_F2_D	102_F3_D	102_F4_D	102_F5_D	105_B0_D	105_B1_D	105_B2_D	105_F1_D	105_F2_D	105_F3_D	105_F4_D	105_F5_D	106_B0_D	106_B1_D	106_B2_D	106_F1_D	106_F2_D	106_F3_D	106_F4_D	106_F5_D	107_B0_D	107_B1_D	107_B2_D	107_F1_D	107_F2_D	107_F3_D	107_F4_D	107_F5_D	108_B0_D	108_B1_D	108_B2_D	108_F1_D	108_F2_D	108_F3_D	108_F4_D	108_F5_D	109_B0_D	109_B1_D	109_B2_D	109_F1_D	109_F2_D	109_F3_D	109_F4_D	109_F5_D
305	root;Bacteria;;;;Proteobacteria;;;Betaproteobacteria;;;;;;Burkholderiales;;;;;Burkholderiaceae;;;;Ralstonia;;;;Ralstonia solanacearum;;;;;	1.85e-06	3.49e-06	0	5.98e-06	3.27e-06	3.27e-06	2.64e-06	1.02e-06	1.16e-06	4.2e-06	1.47e-06	5.93e-06	3.01e-06	4.29e-06	2.04e-06	3.59e-06	0	0	3.44e-06	3.11e-06	0	1.86e-06	0	0	1.29e-06	0	7.84e-07	0	5.42e-06	6.65e-07	7.35e-07	9.37e-07	0	1.94e-06	0	2.42e-06	2.66e-06	8.97e-07	1.21e-06	2.08e-06	2.26e-06	9.03e-07	3.23e-06	3.08e-06	3.14e-06	9.43e-07	1.32e-06	4.16e-06
329	root;Bacteria;;;;Proteobacteria;;;Betaproteobacteria;;;;;;Burkholderiales;;;;;Burkholderiaceae;;;;Ralstonia;;;;Ralstonia pickettii;;;;;	0	0	0	0	0	0	0	0	0	0	0	0	0	0	0	0	0	0	0	0	0	0	0	0	0	0	0	0	0	0	0	0	0	0	0	0	0	0	0	0	0	0	0	0	0	0	0	0
375	root;Bacteria;;;;Proteobacteria;;;Alphaproteobacteria;;;;;;Rhizobiales;;;;;Bradyrhizobiaceae;;;;Bradyrhizobium;;;;Bradyrhizobium japonicum;;;;;	0	0	0	0	0	0	0	0	0	0	0	0	0	0	0	0	0	0	0	0	0	0	0	0	0	0	0	0	0	0	0	0	0	0	0	0	0	0	0	0	0	0	0	0	0	0	0	0
376	root;Bacteria;;;;Proteobacteria;;;Alphaproteobacteria;;;;;;Rhizobiales;;;;;Bradyrhizobiaceae;;;;Bradyrhizobium;;;;Bradyrhizobium sp.;;;;;	0	1.74e-06	0	1.2e-06	0	0	0	0	0	0	0	0	0	0	0	0	0	0	0	0	0	0	0	0	0	0	0	0	0	0	0	0	0	0	0	0	0	0	0	0	0	0	0	0	0	0	0	0
381	root;Bacteria;;;;Proteobacteria;;;Alphaproteobacteria;;;;;;Rhizobiales;;;;;Phyllobacteriaceae;;;;Mesorhizobium;;;;Mesorhizobium loti;;;;;	0	0	0	0	0	0	0	0	0	0	0	0	0	0	0	0	0	0	0	0	0	0	0	0	0	0	0	0	0	0	0	0	0	0	0	0	0	0	0	0	0	0	0	0	0	0	0	0
409	root;Bacteria;;;;Proteobacteria;;;Alphaproteobacteria;;;;;;Rhizobiales;;;;;Methylobacteriaceae;;;;Methylobacterium;;;;Methylobacterium sp.;;;;;	0	0	0	0	0	0	0	0	1.16e-06	0	0	0	0	0	0	0	0	0	0	0	0	0	0	0	0	0	0	0	0	0	0	0	0	0	0	0	0	0	0	0	0	0	0	0	0	0	0	0
511	root;Bacteria;;;;Proteobacteria;;;Betaproteobacteria;;;;;;Burkholderiales;;;;;Alcaligenaceae;;;;Alcaligenes;;;;Alcaligenes faecalis;;;;;	0	0	0	0	0	0	0	0	0	0	0	0	0	0	0	0	0	0	0	0	0	0	0	0	0	0	0	0	0	0	0	0	0	0	0	0	0	0	0	0	0	0	0	0	0	0	0	0
964	root;Bacteria;;;;Proteobacteria;;;Betaproteobacteria;;;;;;Burkholderiales;;;;;Oxalobacteraceae;;;;Herbaspirillum;;;;Herbaspirillum seropedicae;;;;;	0	0	0	0	0	0	0	0	0	0	0	0	0	0	0	0	0	0	0	0	0	0	0	0	0	0	0	0	0	0	0	0	0	0	0	0	0	0	0	0	0	0	0	0	0	0	0	0
1575	root;Bacteria;;;;Actinobacteria;;;Actinobacteria;;;;;;Micrococcales;;;;;Microbacteriaceae;;;;Leifsonia;;;;Leifsonia xyli;;;;;	0	0	0	0	0	0	0	0	0	0	0	0	0	0	0	0	0	0	0	0	0	0	0	0	0	0	0	0	0	0	0	0	0	0	0	0	0	0	0	0	0	0	0	0	0	0	0	0
2033	root;Bacteria;;;;Actinobacteria;;;Actinobacteria;;;;;;Micrococcales;;;;;Microbacteriaceae;;;;Microbacterium;;;;Microbacterium testaceum;;;;;	0	0	0	0	0	0	0	0	0	0	0	0	0	0	0	0	0	0	0	0	0	0	0	0	0	0	0	0	0	0	0	0	0	0	0	0	0	0	0	0	0	0	0	0	0	0	0	0
13688	root;Bacteria;;;;Proteobacteria;;;Alphaproteobacteria;;;;;;Sphingomonadales;;;;;Sphingomonadaceae;;;;Novosphingobium;;;;Novosphingobium capsulatum;;;;;	0	0	0	0	0	0	0	0	0	0	0	0	0	0	0	0	0	0	0	0	0	0	0	0	0	0	0	0	0	0	0	0	0	0	0	0	0	0	0	0	0	0	0	0	0	0	0	0
29448	root;Bacteria;;;;Proteobacteria;;;Alphaproteobacteria;;;;;;Rhizobiales;;;;;Bradyrhizobiaceae;;;;Bradyrhizobium;;;;Bradyrhizobium elkanii;;;;;	0	0	0	0	0	0	0	0	0	0	0	0	0	0	0	0	0	0	0	0	0	0	0	0	0	0	0	0	0	0	0	0	0	0	0	0	0	0	0	0	0	0	0	0	0	0	0	0
31998	root;Bacteria;;;;Proteobacteria;;;Alphaproteobacteria;;;;;;Rhizobiales;;;;;Methylobacteriaceae;;;;Methylobacterium;;;;Methylobacterium radiotolerans;;;;;	0	0	0	0	0	0	0	0	0	0	0	0	0	0	0	0	0	0	0	0	0	0	0	0	0	0	0	0	0	0	0	0	0	0	0	0	0	0	0	0	0	0	0	0	0	0	0	0
32001	root;Bacteria;;;;Proteobacteria;;;Betaproteobacteria;;;;;;Burkholderiales;;;;;Alcaligenaceae;;;;Alcaligenes;;;;Alcaligenes faecalis;;;;;	0	0	0	0	0	0	0	0	0	0	0	0	0	0	0	0	0	0	0	0	0	0	0	0	0	0	0	0	0	0	0	0	0	0	0	0	0	0	0	0	0	0	0	0	0	0	0	0
33883	root;Bacteria;;;;Actinobacteria;;;Actinobacteria;;;;;;Micrococcales;;;;;Microbacteriaceae;;;;Microbacterium;;;;Microbacterium arborescens;;;;;	1.85e-06	1.74e-06	2.35e-06	2.39e-06	1.63e-06	1.63e-06	3.95e-06	0	1.16e-06	6.99e-06	5.89e-06	3.95e-06	1.51e-06	5.73e-06	3.06e-06	3.59e-06	0	0	3.44e-06	7.79e-07	6.52e-06	1.86e-06	4.25e-07	0	0	0	3.13e-06	0	9.03e-07	5.99e-06	2.45e-06	0	0	1.94e-06	1.26e-06	0	3.98e-06	0	1.21e-06	0	4.53e-06	0	2.15e-06	3.08e-06	1.05e-06	1.89e-06	1.32e-06	1.39e-06
36805	root;Bacteria;;;;Actinobacteria;;;Actinobacteria;;;;;;Micrococcales;;;;;Microbacteriaceae;;;;Microbacterium;;;;Microbacterium aurum;;;;;	0	0	0	0	0	0	0	0	0	0	0	0	0	0	0	0	0	0	0	0	0	0	0	0	0	0	0	0	0	0	0	0	0	0	0	0	0	0	0	0	0	0	0	0	0	0	0	0
39645	root;Bacteria;;;;Proteobacteria;;;Alphaproteobacteria;;;;;;Rhizobiales;;;;;Phyllobacteriaceae;;;;Mesorhizobium;;;;Mesorhizobium ciceri;;;;;	0	0	0	0	0	0	0	0	0	0	0	0	0	0	0	0	0	0	0	0	0	0	0	0	0	0	0	0	0	0	0	0	0	0	0	0	0	0	0	0	0	0	0	0	0	0	0	0
43992	root;Bacteria;;;;Proteobacteria;;;Alphaproteobacteria;;;;;;Rhizobiales;;;;;Bradyrhizobiaceae;;;;Bradyrhizobium;;;;Bradyrhizobium liaoningense;;;;;	0	0	0	0	0	0	0	0	0	0	0	0	0	0	0	0	0	0	0	0	0	0	0	0	0	0	0	0	0	0	0	0	0	0	0	0	0	0	0	0	0	0	0	0	0	0	0	0
44255	root;Bacteria;;;;Proteobacteria;;;Alphaproteobacteria;;;;;;Rhizobiales;;;;;Bradyrhizobiaceae;;;;Bradyrhizobium;;;;Bradyrhizobium oligotrophicum;;;;;	0	0	0	0	0	0	0	0	0	0	0	0	0	0	0	0	0	0	0	0	0	0	0	0	0	0	0	0	0	0	0	0	0	0	0	0	0	0	0	0	0	0	0	0	0	0	0	0
51671	root;Bacteria;;;;Actinobacteria;;;Actinobacteria;;;;;;Micrococcales;;;;;Microbacteriaceae;;;;Microbacterium;;;;Microbacterium sp.;;;;;	0	0	0	0	0	0	0	0	0	0	0	0	0	0	0	0	0	0	0	0	0	0	0	0	0	0	0	0	0	0	0	0	0	0	0	0	0	0	0	0	0	0	0	0	0	0	0	0
57043	root;Bacteria;;;;Actinobacteria;;;Actinobacteria;;;;;;Micrococcales;;;;;Microbacteriaceae;;;;Microbacterium;;;;Microbacterium esteraromaticum;;;;;	5.56e-06	0	1.18e-06	0	0	0	1.32e-06	0	0	0	4.42e-06	1.98e-06	0	0	1.02e-06	2.39e-06	0	0	0	0	1.3e-06	0	0	0	0	0	1.57e-06	0	1.81e-06	6.65e-07	4.9e-07	0	0	0	0	1.21e-06	1.33e-06	0	0	0	9.51e-06	0	0	0	1.05e-06	9.43e-07	1.32e-06	0
69974	root;Bacteria;;;;Proteobacteria;;;Alphaproteobacteria;;;;;;Rhizobiales;;;;;Phyllobacteriaceae;;;;Mesorhizobium;;;;Mesorhizobium plurifarium;;;;;	0	0	0	0	0	0	0	0	0	0	0	0	0	0	0	0	0	0	0	0	0	0	0	0	0	0	0	0	0	0	0	0	0	0	0	0	0	0	0	0	0	0	0	0	0	0	0	1.39e-06
71433	root;Bacteria;;;;Proteobacteria;;;Alphaproteobacteria;;;;;;Rhizobiales;;;;;Phyllobacteriaceae;;;;Mesorhizobium;;;;Mesorhizobium amorphae;;;;;	0	0	0	0	0	0	0	0	0	0	0	0	0	0	0	0	0	0	0	0	0	0	0	0	0	0	0	0	0	0	0	0	0	0	0	0	0	0	0	0	0	0	0	0	0	0	0	0
76884	root;Bacteria;;;;Actinobacteria;;;Actinobacteria;;;;;;Micrococcales;;;;;Microbacteriaceae;;;;Microbacterium;;;;Microbacterium kitamiense;;;;;	0	0	0	0	0	0	0	0	0	0	0	0	0	0	0	0	0	0	0	0	0	0	0	0	0	0	0	0	0	0	0	0	0	0	0	0	0	0	0	0	0	0	0	0	0	0	0	0
76978	root;Bacteria;;;;Proteobacteria;;;Alphaproteobacteria;;;;;;Sphingomonadales;;;;;Sphingomonadaceae;;;;Novosphingobium;;;;Novosphingobium rosa;;;;;	0	0	0	0	0	0	0	0	0	0	0	0	0	0	0	0	0	0	0	0	0	0	0	0	0	0	0	0	0	0	0	0	0	0	0	0	0	0	0	0	0	0	0	0	0	0	0	0
80842	root;Bacteria;;;;Proteobacteria;;;Betaproteobacteria;;;;;;Burkholderiales;;;;;Oxalobacteraceae;;;;Herbaspirillum;;;;Herbaspirillum rubrisubalbicans;;;;;	0	0	0	0	0	0	0	0	0	1.4e-06	0	0	0	0	0	1.2e-06	0	3.07e-06	0	0	0	0	0	0	0	0	0	0	0	3.33e-06	0	0	0	9.7e-07	0	1.21e-06	0	0	0	1.35e-05	0	0	0	0	0	0	0	0
82380	root;Bacteria;;;;Actinobacteria;;;Actinobacteria;;;;;;Micrococcales;;;;;Microbacteriaceae;;;;Microbacterium;;;;Microbacterium oxydans;;;;;	0	0	0	0	0	0	0	0	0	0	0	0	0	0	0	0	0	0	0	0	0	0	0	0	0	0	0	0	0	0	0	0	0	0	0	0	0	0	0	0	0	0	0	0	0	0	0	0
84292	root;Bacteria;;;;Actinobacteria;;;Actinobacteria;;;;;;Micrococcales;;;;;Microbacteriaceae;;;;Microbacterium;;;;Microbacterium chocolatum;;;;;	0	0	0	0	0	0	0	0	0	0	0	0	0	0	0	0	0	0	0	0	0	0	0	0	0	0	0	0	0	0	0	0	0	0	0	0	0	0	0	0	0	0	0	0	0	0	0	0
92835	root;Bacteria;;;;Actinobacteria;;;Actinobacteria;;;;;;Micrococcales;;;;;Microbacteriaceae;;;;Microbacterium;;;;Microbacterium ketosireducens;;;;;	0	0	0	0	0	0	0	0	0	0	0	0	0	0	0	0	0	0	0	0	0	0	0	0	0	0	0	0	0	0	0	0	0	0	0	0	0	0	0	0	0	0	0	0	0	0	0	0
96765	root;Bacteria;;;;Actinobacteria;;;Actinobacteria;;;;;;Micrococcales;;;;;Microbacteriaceae;;;;Microbacterium;;;;Microbacterium sp. B19;;;;;	0	0	0	0	0	0	0	0	0	0	0	0	0	0	0	0	0	0	0	0	0	0	0	0	0	0	0	0	0	0	0	0	0	0	0	0	0	0	0	0	0	0	0	0	0	0	0	0
104336	root;Bacteria;;;;Actinobacteria;;;Actinobacteria;;;;;;Micrococcales;;;;;Microbacteriaceae;;;;Microbacterium;;;;Microbacterium foliorum;;;;;	0	0	0	0	0	0	0	0	0	0	0	0	0	0	0	0	0	0	0	0	0	0	0	0	0	0	0	0	0	0	0	0	0	0	0	0	0	0	0	0	0	0	0	0	0	0	1.32e-06	0
105219	root;Bacteria;;;;Proteobacteria;;;Betaproteobacteria;;;;;;Burkholderiales;;;;;Burkholderiaceae;;;;Ralstonia;;;;Ralstonia mannitolilytica;;;;;	0	0	0	0	1.63e-06	1.63e-06	2.64e-06	0	1.16e-06	2.8e-06	2.94e-06	0	1.51e-06	1.43e-06	0	1.2e-06	0	0	0	0	0	0	0	0	0	0	7.84e-07	0	1.81e-06	0	0	0	0	0	0	0	0	8.97e-07	0	0	0	0	0	0	0	0	0	0
108015	root;Bacteria;;;;Proteobacteria;;;Alphaproteobacteria;;;;;;Rhizobiales;;;;;Bradyrhizobiaceae;;;;Bradyrhizobium;;;;Bradyrhizobium yuanmingense;;;;;	0	0	0	0	0	0	0	0	0	0	0	0	0	0	0	0	0	0	0	0	0	0	0	0	0	0	0	0	0	0	0	0	0	0	0	0	0	0	0	0	0	0	0	0	0	0	0	0
113395	root;Bacteria;;;;Proteobacteria;;;Alphaproteobacteria;;;;;;Rhizobiales;;;;;Bradyrhizobiaceae;;;;Bradyrhizobium;;;;Bradyrhizobium sp. Tv2a-2;;;;;	0	0	0	0	0	0	0	0	0	0	0	0	0	0	0	0	0	0	0	0	0	0	0	0	0	0	0	0	0	0	0	0	0	0	0	0	0	0	0	0	0	0	0	0	0	0	0	0
114615	root;Bacteria;;;;Proteobacteria;;;Alphaproteobacteria;;;;;;Rhizobiales;;;;;Bradyrhizobiaceae;;;;Bradyrhizobium;;;;Bradyrhizobium sp. ORS 278;;;;;	0	0	0	0	0	0	0	0	0	0	0	0	0	0	0	0	0	0	0	0	0	0	0	0	0	0	0	0	0	0	0	0	0	0	0	0	0	0	0	0	0	0	0	0	0	0	0	0
114616	root;Bacteria;;;;Proteobacteria;;;Alphaproteobacteria;;;;;;Rhizobiales;;;;;Methylobacteriaceae;;;;Methylobacterium;;;;Methylobacterium nodulans;;;;;	0	0	0	0	0	0	0	0	0	0	0	0	0	0	0	0	0	0	0	0	0	0	0	0	0	0	0	0	0	0	0	0	0	0	0	0	0	0	0	0	0	0	0	0	0	0	0	0
115808	root;Bacteria;;;;Proteobacteria;;;Alphaproteobacteria;;;;;;Rhizobiales;;;;;Bradyrhizobiaceae;;;;Bradyrhizobium;;;;Bradyrhizobium sp. ORS 285;;;;;	0	0	0	0	0	0	0	0	0	0	0	0	0	0	0	0	0	0	0	0	0	0	0	0	0	0	0	0	0	0	0	0	0	0	0	0	0	0	0	0	0	0	0	0	0	0	0	0
142585	root;Bacteria;;;;Proteobacteria;;;Alphaproteobacteria;;;;;;Rhizobiales;;;;;Bradyrhizobiaceae;;;;Bradyrhizobium;;;;Bradyrhizobium sp. C9;;;;;	0	0	0	0	0	0	0	0	0	0	0	0	0	0	0	0	0	0	0	0	0	0	0	0	0	0	0	0	0	0	0	0	0	0	0	0	0	0	0	0	0	0	0	0	0	0	0	0
144185	root;Bacteria;;;;Actinobacteria;;;Actinobacteria;;;;;;Micrococcales;;;;;Microbacteriaceae;;;;Leifsonia;;;;Leifsonia aquatica;;;;;	0	0	0	0	0	0	0	0	0	0	0	0	0	0	0	0	0	0	0	0	0	0	0	0	0	0	0	0	0	0	0	0	0	0	0	0	0	0	0	0	0	0	0	0	0	0	0	0
156977	root;Bacteria;;;;Actinobacteria;;;Actinobacteria;;;;;;Micrococcales;;;;;Microbacteriaceae;;;;Microbacterium;;;;Microbacterium resistens;;;;;	0	0	0	0	0	0	0	0	0	0	0	0	0	0	0	0	0	0	0	0	0	0	0	0	0	0	0	0	0	0	0	0	0	0	0	0	0	0	0	0	0	0	0	0	0	0	0	0
158500	root;Bacteria;;;;Proteobacteria;;;Alphaproteobacteria;;;;;;Sphingomonadales;;;;;Sphingomonadaceae;;;;Novosphingobium;;;;Novosphingobium resinovorum;;;;;	0	0	0	0	0	0	0	0	0	0	0	0	0	0	0	0	0	0	0	0	0	0	0	0	0	0	0	0	0	0	0	0	0	0	0	0	0	0	0	0	0	0	0	0	0	0	0	0
159896	root;Bacteria;;;;Actinobacteria;;;Actinobacteria;;;;;;Micrococcales;;;;;Microbacteriaceae;;;;Microbacterium;;;;Microbacterium gubbeenense;;;;;	0	0	0	0	0	0	0	0	0	0	0	0	0	0	0	0	0	0	0	0	0	0	0	0	0	0	0	0	0	0	0	0	0	0	0	0	0	0	0	0	0	0	0	0	0	0	0	0
162426	root;Bacteria;;;;Actinobacteria;;;Actinobacteria;;;;;;Micrococcales;;;;;Microbacteriaceae;;;;Microbacterium;;;;Microbacterium hominis;;;;;	0	0	0	0	0	0	0	0	0	0	0	0	0	0	0	0	0	0	0	0	0	0	0	0	0	0	0	0	0	0	0	0	0	0	0	0	0	0	0	0	0	0	0	0	0	0	0	0
167468	root;Bacteria;;;;Proteobacteria;;;Alphaproteobacteria;;;;;;Rhizobiales;;;;;Bradyrhizobiaceae;;;;Bradyrhizobium;;;;Bradyrhizobium sp. ORS 3257;;;;;	0	0	0	0	0	0	0	0	0	0	0	0	0	0	0	0	0	0	0	0	0	0	0	0	0	0	0	0	0	0	0	0	0	0	0	0	0	0	0	0	0	0	0	0	0	0	0	0
169176	root;Bacteria;;;;Proteobacteria;;;Alphaproteobacteria;;;;;;Sphingomonadales;;;;;Sphingomonadaceae;;;;Novosphingobium;;;;Novosphingobium tardaugens;;;;;	0	0	0	0	0	0	0	0	0	0	0	0	0	0	0	0	0	0	0	0	0	0	0	0	0	0	0	0	0	0	0	0	0	0	0	0	0	0	0	0	0	0	0	0	0	0	0	0
180195	root;Bacteria;;;;Proteobacteria;;;Betaproteobacteria;;;;;;Burkholderiales;;;;;Oxalobacteraceae;;;;Herbaspirillum;;;;Herbaspirillum autotrophicum;;;;;	0	0	0	0	0	0	0	0	0	0	0	0	0	0	0	0	0	0	0	0	0	0	0	0	0	0	0	0	0	0	0	0	0	0	0	0	0	0	0	0	0	0	0	0	0	0	0	0
189753	root;Bacteria;;;;Proteobacteria;;;Alphaproteobacteria;;;;;;Rhizobiales;;;;;Bradyrhizobiaceae;;;;Bradyrhizobium;;;;Bradyrhizobium sp. Ec3.3;;;;;	0	0	0	0	0	0	0	0	0	0	0	0	0	0	0	0	0	0	0	0	0	0	0	0	0	0	0	0	0	0	0	0	0	0	0	0	0	0	0	0	0	0	0	0	0	0	0	0
190148	root;Bacteria;;;;Proteobacteria;;;Alphaproteobacteria;;;;;;Rhizobiales;;;;;Bradyrhizobiaceae;;;;Bradyrhizobium;;;;Bradyrhizobium paxllaeri;;;;;	0	0	0	0	0	0	0	0	0	0	0	0	0	0	0	0	0	0	0	0	0	0	0	0	0	0	0	0	0	0	0	0	0	0	0	0	0	0	0	0	0	0	0	0	0	0	0	0
190721	root;Bacteria;;;;Proteobacteria;;;Betaproteobacteria;;;;;;Burkholderiales;;;;;Burkholderiaceae;;;;Ralstonia;;;;Ralstonia insidiosa;;;;;	0	0	0	0	0	0	0	0	0	0	0	0	0	0	0	0	0	0	0	0	0	0	0	0	0	0	0	0	0	0	0	0	0	0	0	0	0	0	0	0	0	0	0	0	0	0	0	0
191216	root;Bacteria;;;;Actinobacteria;;;Actinobacteria;;;;;;Micrococcales;;;;;Microbacteriaceae;;;;Microbacterium;;;;uncultured Microbacterium sp.;;;;;	0	0	0	0	0	0	0	0	0	0	0	0	0	0	0	0	0	0	0	0	0	0	0	0	0	0	0	0	0	0	0	0	0	0	0	0	0	0	0	0	0	0	0	0	0	0	0	0
191389	root;Bacteria;;;;Actinobacteria;;;Actinobacteria;;;;;;Micrococcales;;;;;Microbacteriaceae;;;;Leifsonia;;;;Leifsonia rubra;;;;;	0	0	0	0	0	0	0	0	0	0	0	0	0	0	0	0	0	0	0	0	0	0	0	0	0	0	0	0	0	0	0	0	0	0	0	0	0	0	0	0	0	0	0	0	0	0	0	0
196490	root;Bacteria;;;;Proteobacteria;;;Alphaproteobacteria;;;;;;Rhizobiales;;;;;Bradyrhizobiaceae;;;;Bradyrhizobium;;;;Bradyrhizobium sp. Ai1a-2;;;;;	0	0	0	0	0	0	0	0	0	0	0	0	0	0	0	0	0	0	0	0	0	0	0	0	0	0	0	0	0	0	0	0	0	0	0	0	0	0	0	0	0	0	0	0	0	0	0	0
199592	root;Bacteria;;;;Actinobacteria;;;Actinobacteria;;;;;;Micrococcales;;;;;Microbacteriaceae;;;;Microbacterium;;;;Microbacterium paraoxydans;;;;;	0	0	0	0	0	0	0	0	0	0	0	0	0	0	0	0	0	0	0	0	0	0	0	0	0	0	0	0	0	0	0	0	0	0	0	0	0	0	0	0	0	0	0	0	0	0	0	0
211589	root;Bacteria;;;;Proteobacteria;;;Betaproteobacteria;;;;;;Burkholderiales;;;;;Oxalobacteraceae;;;;Herbaspirillum;;;;Herbaspirillum chlorophenolicum;;;;;	0	0	0	0	0	0	0	0	0	0	0	0	0	0	0	0	0	0	0	0	0	0	0	0	0	0	0	0	0	0	0	0	0	0	0	0	0	0	0	0	0	0	0	0	0	0	0	0
213312	root;Bacteria;;;;Proteobacteria;;;Betaproteobacteria;;;;;;Burkholderiales;;;;;Oxalobacteraceae;;;;Herbaspirillum;;;;Herbaspirillum lusitanum;;;;;	0	0	0	0	0	0	0	0	0	0	0	0	0	0	0	0	0	0	0	0	0	0	0	0	0	0	0	0	0	0	0	0	0	0	0	0	0	0	0	0	0	0	0	0	0	0	0	0
244734	root;Bacteria;;;;Proteobacteria;;;Alphaproteobacteria;;;;;;Rhizobiales;;;;;Bradyrhizobiaceae;;;;Bradyrhizobium;;;;Bradyrhizobium betae;;;;;	0	0	0	0	0	0	0	0	0	0	0	0	0	0	0	0	0	0	0	0	0	0	0	0	0	0	0	0	0	0	0	0	0	0	0	0	0	0	0	0	0	0	0	0	0	0	0	0
246613	root;Bacteria;;;;Actinobacteria;;;Actinobacteria;;;;;;Micrococcales;;;;;Microbacteriaceae;;;;Microbacterium;;;;Microbacterium halotolerans;;;;;	0	0	0	0	0	0	0	0	0	0	0	0	0	0	0	0	0	0	0	0	0	0	0	0	0	0	0	0	0	0	0	0	0	0	0	0	0	0	0	0	0	0	0	0	0	0	0	0
255045	root;Bacteria;;;;Proteobacteria;;;Alphaproteobacteria;;;;;;Rhizobiales;;;;;Bradyrhizobiaceae;;;;Bradyrhizobium;;;;Bradyrhizobium canariense;;;;;	9.26e-07	1.74e-06	1.18e-06	0	0	0	1.32e-06	3.78e-05	5.82e-06	0	1.47e-06	0	1.51e-06	0	1.02e-06	0	0	0	8.59e-07	5.06e-06	0	0	0	3.66e-06	0	0	0	0	0	6.65e-07	0	2.81e-06	0	3.88e-06	4.19e-07	0	0	0	0	0	1.9e-05	8.13e-06	1.08e-06	0	3.14e-06	3.77e-06	1.32e-06	1.39e-06
266835	root;Bacteria;;;;Proteobacteria;;;Alphaproteobacteria;;;;;;Rhizobiales;;;;;Phyllobacteriaceae;;;;Mesorhizobium;;;;Mesorhizobium japonicum;;;;;	0	0	0	0	0	0	0	0	0	0	0	0	0	0	0	0	0	0	0	0	0	0	0	0	0	0	0	0	0	0	0	0	0	0	0	0	0	0	0	0	0	0	0	0	0	0	0	0
270351	root;Bacteria;;;;Proteobacteria;;;Alphaproteobacteria;;;;;;Rhizobiales;;;;;Methylobacteriaceae;;;;Methylobacterium;;;;Methylobacterium aquaticum;;;;;	0	0	0	0	0	0	0	0	0	0	0	0	0	0	0	0	0	0	0	0	0	0	0	0	0	0	0	0	0	0	0	0	0	0	0	0	0	0	0	0	0	0	0	0	0	0	0	0
273168	root;Bacteria;;;;Proteobacteria;;;Alphaproteobacteria;;;;;;Sphingomonadales;;;;;Sphingomonadaceae;;;;Novosphingobium;;;;Novosphingobium naphthalenivorans;;;;;	0	0	0	0	0	0	0	0	0	0	0	0	0	0	0	0	0	0	0	0	0	0	0	0	0	0	0	0	0	0	0	0	0	0	0	0	0	0	0	0	0	0	0	0	0	0	0	0
273677	root;Bacteria;;;;Actinobacteria;;;Actinobacteria;;;;;;Micrococcales;;;;;Microbacteriaceae;;;;Microbacterium;;;;Microbacterium oleivorans;;;;;	0	0	0	0	0	0	0	0	0	0	0	0	0	0	0	0	0	0	0	0	0	0	0	0	0	0	0	0	0	0	0	0	0	9.7e-07	0	0	0	0	0	0	0	0	0	0	0	0	0	0
280332	root;Bacteria;;;;Proteobacteria;;;Alphaproteobacteria;;;;;;Rhizobiales;;;;;Bradyrhizobiaceae;;;;Bradyrhizobium;;;;Bradyrhizobium jicamae;;;;;	0	0	0	0	0	0	0	0	0	0	0	0	0	0	0	0	0	0	0	0	0	0	0	0	0	0	0	0	0	0	0	0	0	0	0	0	0	0	0	0	0	0	0	0	0	0	0	0
280333	root;Bacteria;;;;Proteobacteria;;;Alphaproteobacteria;;;;;;Rhizobiales;;;;;Bradyrhizobiaceae;;;;Bradyrhizobium;;;;Bradyrhizobium pachyrhizi;;;;;	0	0	0	0	0	0	0	0	1.16e-06	0	0	0	0	0	0	0	0	0	0	0	0	0	0	0	0	0	0	0	0	0	0	0	0	0	0	0	0	0	0	0	0	0	0	0	0	0	0	0
288000	root;Bacteria;;;;Proteobacteria;;;Alphaproteobacteria;;;;;;Rhizobiales;;;;;Bradyrhizobiaceae;;;;Bradyrhizobium;;;;Bradyrhizobium sp. BTAi1;;;;;	0	0	0	0	0	0	0	0	0	0	0	0	0	0	0	0	0	0	0	3.89e-07	0	0	0	0	0	0	0	0	0	0	0	0	0	0	0	0	0	0	0	0	0	0	0	0	0	0	1.32e-06	0
298794	root;Bacteria;;;;Proteobacteria;;;Alphaproteobacteria;;;;;;Rhizobiales;;;;;Methylobacteriaceae;;;;Methylobacterium;;;;Methylobacterium variabile;;;;;	0	0	0	0	0	0	0	0	0	0	0	0	0	0	0	0	0	0	0	0	0	0	0	0	0	0	0	0	0	0	0	0	0	0	0	0	0	0	0	0	0	0	0	0	0	0	0	0
300019	root;Bacteria;;;;Actinobacteria;;;Actinobacteria;;;;;;Micrococcales;;;;;Microbacteriaceae;;;;Microbacterium;;;;Microbacterium paludicola;;;;;	0	0	0	0	0	0	0	0	0	0	0	0	0	0	0	0	0	0	0	0	0	0	0	0	0	0	0	0	0	0	0	0	0	0	0	0	0	0	0	0	0	0	0	0	0	0	0	0
302165	root;Bacteria;;;;Proteobacteria;;;Alphaproteobacteria;;;;;;Rhizobiales;;;;;Bradyrhizobiaceae;;;;Bradyrhizobium;;;;Bradyrhizobium sp. CCBAU 23230;;;;;	0	0	0	0	0	0	0	0	0	0	0	0	0	0	0	0	0	0	0	0	0	0	0	0	0	0	0	0	0	0	0	0	0	0	0	0	0	0	0	0	0	0	0	0	0	0	0	0
312253	root;Bacteria;;;;Proteobacteria;;;Alphaproteobacteria;;;;;;Rhizobiales;;;;;Bradyrhizobiaceae;;;;Bradyrhizobium;;;;Bradyrhizobium tropiciagri;;;;;	0	0	0	0	0	0	0	0	0	0	0	0	0	0	0	0	0	0	0	0	0	0	0	0	0	0	0	0	0	0	0	0	0	0	0	0	0	0	0	0	0	0	0	0	0	0	0	0
318996	root;Bacteria;;;;Proteobacteria;;;Alphaproteobacteria;;;;;;Rhizobiales;;;;;Bradyrhizobiaceae;;;;Bradyrhizobium;;;;Bradyrhizobium sp. WSM1743;;;;;	0	0	0	0	0	0	0	0	0	0	0	0	0	0	0	0	0	0	0	0	0	0	0	0	0	0	0	0	0	0	0	0	0	0	0	0	0	0	0	0	0	0	0	0	0	0	0	0
319003	root;Bacteria;;;;Proteobacteria;;;Alphaproteobacteria;;;;;;Rhizobiales;;;;;Bradyrhizobiaceae;;;;Bradyrhizobium;;;;Bradyrhizobium sp. WSM1253;;;;;	0	0	0	0	0	0	0	0	0	0	0	0	0	0	0	0	0	0	0	0	0	0	0	0	0	0	0	0	0	0	0	0	0	0	0	0	0	0	0	0	0	0	0	0	0	0	0	0
319017	root;Bacteria;;;;Proteobacteria;;;Alphaproteobacteria;;;;;;Rhizobiales;;;;;Bradyrhizobiaceae;;;;Bradyrhizobium;;;;Bradyrhizobium sp. WSM471;;;;;	0	0	0	0	0	0	0	0	0	0	0	0	0	0	0	0	0	0	0	0	0	0	0	0	0	0	0	0	0	0	0	0	0	0	0	0	0	0	0	0	0	0	0	0	0	0	0	0
323284	root;Bacteria;;;;Proteobacteria;;;Betaproteobacteria;;;;;;Burkholderiales;;;;;Alcaligenaceae;;;;Alcaligenes;;;;Alcaligenes aquatilis;;;;;	0	0	0	0	0	0	0	0	0	0	1.47e-06	0	0	0	0	0	0	0	0	0	0	0	0	0	0	0	0	0	9.03e-07	0	0	0	0	0	0	0	0	0	0	0	0	0	0	0	0	0	1.32e-06	0
335659	root;Bacteria;;;;Proteobacteria;;;Alphaproteobacteria;;;;;;Rhizobiales;;;;;Bradyrhizobiaceae;;;;Bradyrhizobium;;;;Bradyrhizobium sp. S23321;;;;;	0	0	0	0	0	0	0	0	0	0	0	0	0	0	0	0	0	0	0	0	0	0	0	0	0	0	0	0	0	0	0	0	0	0	0	0	0	0	0	0	0	0	0	0	0	0	0	0
342110	root;Bacteria;;;;Proteobacteria;;;Betaproteobacteria;;;;;;Burkholderiales;;;;;Burkholderiaceae;;;;Ralstonia;;;;Ralstonia solanacearum;;;;;	0	0	0	0	0	0	0	0	0	0	0	0	0	0	0	0	0	0	0	0	0	0	0	0	0	0	0	0	0	0	0	0	0	0	0	0	0	0	0	0	0	0	0	0	0	0	0	0
358100	root;Bacteria;;;;Actinobacteria;;;Actinobacteria;;;;;;Micrococcales;;;;;Microbacteriaceae;;;;Microbacterium;;;;Microbacterium indicum;;;;;	0	0	0	0	0	0	0	0	0	0	0	0	0	0	0	0	0	0	0	0	0	0	0	0	0	0	0	0	0	0	0	0	0	0	0	0	0	0	0	0	0	0	0	0	0	0	0	0
370764	root;Bacteria;;;;Actinobacteria;;;Actinobacteria;;;;;;Micrococcales;;;;;Microbacteriaceae;;;;Microbacterium;;;;Microbacterium pygmaeum;;;;;	0	0	0	0	0	0	0	0	0	0	0	0	0	0	0	0	0	0	0	0	0	0	0	0	0	0	0	0	0	0	0	0	0	0	0	0	0	0	1.21e-06	0	0	0	0	0	0	0	0	0
398261	root;Bacteria;;;;Proteobacteria;;;Alphaproteobacteria;;;;;;Rhizobiales;;;;;Methylobacteriaceae;;;;Methylobacterium;;;;Methylobacterium sp. WSM2598;;;;;	0	0	0	0	0	0	0	0	0	0	0	0	0	0	0	0	0	0	0	0	0	0	0	0	0	0	0	0	0	0	0	0	0	0	0	0	0	0	0	0	0	0	0	0	0	0	0	0
400772	root;Bacteria;;;;Actinobacteria;;;Actinobacteria;;;;;;Micrococcales;;;;;Microbacteriaceae;;;;Microbacterium;;;;Microbacterium ginsengisoli;;;;;	0	0	0	0	0	0	0	0	0	0	0	0	0	0	0	0	0	0	0	0	0	0	0	0	0	0	0	0	0	0	0	0	0	0	0	0	0	0	0	0	0	0	0	0	0	0	0	0
408180	root;Bacteria;;;;Proteobacteria;;;Alphaproteobacteria;;;;;;Rhizobiales;;;;;Phyllobacteriaceae;;;;Mesorhizobium;;;;Mesorhizobium sp. ORS 3324;;;;;	0	0	0	0	0	0	0	0	0	0	0	0	0	0	0	0	0	0	0	0	0	0	0	0	0	0	0	0	0	0	0	0	0	0	0	0	0	0	0	0	0	0	0	0	0	0	0	0
415217	root;Bacteria;;;;Actinobacteria;;;Actinobacteria;;;;;;Micrococcales;;;;;Microbacteriaceae;;;;Microbacterium;;;;Microbacterium lacus;;;;;	0	0	0	0	0	0	0	0	0	0	0	0	0	0	0	0	0	0	0	0	0	0	0	0	0	0	0	0	0	0	0	0	0	0	0	0	0	0	0	0	0	0	0	0	0	0	0	0
426117	root;Bacteria;;;;Proteobacteria;;;Alphaproteobacteria;;;;;;Rhizobiales;;;;;Methylobacteriaceae;;;;Methylobacterium;;;;Methylobacterium sp. 4-46;;;;;	0	0	0	0	0	0	0	0	0	0	0	0	1.51e-06	0	0	0	0	0	0	0	0	0	0	0	0	0	0	0	0	0	0	0	0	0	0	0	0	0	0	0	0	0	0	0	0	0	0	0
427683	root;Bacteria;;;;Proteobacteria;;;Alphaproteobacteria;;;;;;Rhizobiales;;;;;Methylobacteriaceae;;;;Methylobacterium;;;;Methylobacterium platani;;;;;	0	0	0	0	0	0	0	0	0	0	0	0	0	0	0	0	0	0	0	0	0	0	0	0	0	0	0	0	0	0	0	0	0	0	0	0	0	0	0	0	0	0	0	0	0	0	0	0
428406	root;Bacteria;;;;Proteobacteria;;;Betaproteobacteria;;;;;;Burkholderiales;;;;;Burkholderiaceae;;;;Ralstonia;;;;Ralstonia pickettii;;;;;	0	0	0	0	0	0	0	0	0	0	0	0	0	0	0	0	0	0	0	0	0	0	0	0	0	0	0	0	0	0	0	0	0	0	0	0	0	0	0	0	0	0	0	0	0	0	0	0
428990	root;Bacteria;;;;Proteobacteria;;;Alphaproteobacteria;;;;;;Sphingomonadales;;;;;Sphingomonadaceae;;;;Novosphingobium;;;;Novosphingobium mathurense;;;;;	0	0	0	0	0	0	0	0	0	0	0	0	0	0	0	0	0	0	0	0	0	0	0	0	0	0	0	0	0	0	0	0	0	0	0	0	0	0	0	0	0	0	0	0	0	0	0	0
443598	root;Bacteria;;;;Proteobacteria;;;Alphaproteobacteria;;;;;;Rhizobiales;;;;;Bradyrhizobiaceae;;;;Bradyrhizobium;;;;Bradyrhizobium sp. Cp5.3;;;;;	0	0	0	0	0	0	0	0	0	0	0	0	0	0	0	0	0	0	0	0	0	0	0	0	0	0	0	0	0	0	0	0	0	0	0	0	0	0	0	0	0	0	0	0	0	0	0	0
451764	root;Bacteria;;;;Actinobacteria;;;Actinobacteria;;;;;;Micrococcales;;;;;Microbacteriaceae;;;;Microbacterium;;;;Microbacterium luticocti;;;;;	0	0	0	0	0	0	0	0	0	0	0	0	0	0	0	0	0	0	0	0	0	0	0	0	0	0	0	0	0	0	0	0	0	0	0	0	0	0	0	0	0	0	0	0	0	0	0	0
455353	root;Bacteria;;;;Proteobacteria;;;Alphaproteobacteria;;;;;;Rhizobiales;;;;;Bradyrhizobiaceae;;;;Bradyrhizobium;;;;Bradyrhizobium sp. CCBAU 15544;;;;;	0	0	0	0	0	0	0	0	0	0	0	0	0	0	0	0	0	0	0	0	0	0	0	0	0	0	0	0	0	0	0	0	0	0	0	0	0	0	0	0	0	0	0	0	0	0	0	0
475067	root;Bacteria;;;;Proteobacteria;;;Alphaproteobacteria;;;;;;Rhizobiales;;;;;Phyllobacteriaceae;;;;Mesorhizobium;;;;Mesorhizobium alhagi;;;;;	0	0	0	0	0	0	0	0	0	0	0	0	0	0	0	0	0	0	0	0	0	0	0	0	0	0	0	0	0	0	0	0	0	0	0	0	0	0	0	0	0	0	0	0	0	0	0	0
476282	root;Bacteria;;;;Proteobacteria;;;Alphaproteobacteria;;;;;;Rhizobiales;;;;;Bradyrhizobiaceae;;;;Bradyrhizobium;;;;Bradyrhizobium japonicum;;;;;	0	0	0	0	0	0	0	0	0	0	0	0	0	0	0	0	0	0	0	0	0	0	0	0	0	0	0	0	0	0	0	0	0	0	0	0	0	0	0	0	0	0	0	0	0	0	0	0
505248	root;Bacteria;;;;Proteobacteria;;;Alphaproteobacteria;;;;;;Sphingomonadales;;;;;Sphingomonadaceae;;;;Novosphingobium;;;;Novosphingobium acidiphilum;;;;;	0	0	0	0	0	0	0	0	0	0	0	0	0	0	0	0	0	0	0	0	0	0	0	0	0	0	0	0	0	0	0	0	0	0	0	0	0	0	0	0	0	0	0	0	0	0	0	0
508868	root;Bacteria;;;;Proteobacteria;;;Alphaproteobacteria;;;;;;Rhizobiales;;;;;Bradyrhizobiaceae;;;;Bradyrhizobium;;;;Bradyrhizobium genosp. SA-3;;;;;	0	0	0	0	0	0	0	0	0	0	0	0	0	0	0	0	0	0	0	0	0	0	0	0	0	0	0	0	0	0	0	0	0	0	0	0	0	0	0	0	0	0	0	0	0	0	0	0
536018	root;Bacteria;;;;Proteobacteria;;;Alphaproteobacteria;;;;;;Rhizobiales;;;;;Phyllobacteriaceae;;;;Mesorhizobium;;;;Mesorhizobium australicum;;;;;	0	0	0	0	0	0	0	0	0	0	0	0	0	0	0	0	0	0	0	0	0	0	0	0	0	0	0	0	0	0	0	0	0	0	0	0	0	0	0	0	0	0	0	0	0	0	0	0
537601	root;Bacteria;;;;Proteobacteria;;;Alphaproteobacteria;;;;;;Rhizobiales;;;;;Phyllobacteriaceae;;;;Mesorhizobium;;;;Mesorhizobium sp. BD68;;;;;	0	0	0	0	0	0	0	0	0	0	0	0	0	0	0	0	0	0	0	0	0	0	0	0	0	0	0	0	0	0	0	0	0	0	0	0	0	0	0	0	0	0	0	0	0	0	0	0
540997	root;Bacteria;;;;Proteobacteria;;;Alphaproteobacteria;;;;;;Rhizobiales;;;;;Phyllobacteriaceae;;;;Mesorhizobium;;;;Mesorhizobium sp. ORS 3428;;;;;	0	0	0	0	0	0	0	0	0	0	0	0	0	0	0	0	0	0	0	0	0	0	0	0	0	0	0	0	0	0	0	0	0	0	0	0	0	0	0	0	0	0	0	0	0	0	0	0
546115	root;Bacteria;;;;Actinobacteria;;;Actinobacteria;;;;;;Micrococcales;;;;;Microbacteriaceae;;;;Microbacterium;;;;Microbacterium ginsengiterrae;;;;;	0	0	0	0	0	0	0	0	0	0	0	0	0	0	0	0	0	0	0	0	0	0	0	0	0	0	0	0	0	0	0	0	0	0	0	0	0	0	0	0	0	0	0	0	0	0	0	0
551936	root;Bacteria;;;;Proteobacteria;;;Alphaproteobacteria;;;;;;Rhizobiales;;;;;Bradyrhizobiaceae;;;;Bradyrhizobium;;;;Bradyrhizobium sp. STM 3809;;;;;	0	0	0	0	0	0	0	0	0	0	0	0	0	0	0	0	0	0	0	0	0	0	0	0	0	0	0	0	0	0	0	0	0	0	0	0	0	0	0	0	0	0	0	0	0	0	0	0
551947	root;Bacteria;;;;Proteobacteria;;;Alphaproteobacteria;;;;;;Rhizobiales;;;;;Bradyrhizobiaceae;;;;Bradyrhizobium;;;;Bradyrhizobium sp. STM 3843;;;;;	0	0	0	0	0	0	0	0	0	0	0	0	0	0	0	0	0	0	0	0	0	0	0	0	0	0	0	0	0	0	0	0	0	0	0	0	0	0	0	0	0	0	0	0	0	0	0	0
566679	root;Bacteria;;;;Proteobacteria;;;Alphaproteobacteria;;;;;;Rhizobiales;;;;;Bradyrhizobiaceae;;;;Bradyrhizobium;;;;Bradyrhizobium sp. ORS 375;;;;;	0	0	0	0	0	0	0	0	0	0	0	0	0	0	0	0	0	0	0	0	0	0	0	0	0	0	0	0	0	0	0	0	0	0	0	0	0	0	0	0	0	0	0	0	0	0	0	0
568783	root;Bacteria;;;;Proteobacteria;;;Betaproteobacteria;;;;;;Burkholderiales;;;;;Oxalobacteraceae;;;;Herbaspirillum;;;;Herbaspirillum aquaticum;;;;;	0	0	0	0	0	0	0	0	0	0	0	0	0	0	0	0	0	0	0	0	0	0	0	0	0	0	0	0	0	0	0	0	0	0	0	0	0	0	0	0	0	0	0	0	0	0	0	0
582667	root;Bacteria;;;;Proteobacteria;;;Alphaproteobacteria;;;;;;Rhizobiales;;;;;Methylobacteriaceae;;;;Methylobacterium;;;;Methylobacterium pseudosasicola;;;;;	0	0	0	0	0	0	0	0	0	0	0	0	0	0	0	0	0	0	0	0	0	0	0	0	0	0	0	0	0	0	0	0	0	0	0	0	0	0	0	0	0	0	0	0	0	0	0	0
582672	root;Bacteria;;;;Proteobacteria;;;Alphaproteobacteria;;;;;;Rhizobiales;;;;;Methylobacteriaceae;;;;Methylobacterium;;;;Methylobacterium phyllostachyos;;;;;	0	0	0	0	0	0	0	0	0	0	0	0	0	0	0	0	0	0	0	3.89e-07	0	0	0	0	0	0	0	0	0	0	0	0	0	0	0	0	0	0	0	0	0	0	0	0	0	0	0	0
582680	root;Bacteria;;;;Actinobacteria;;;Actinobacteria;;;;;;Micrococcales;;;;;Microbacteriaceae;;;;Microbacterium;;;;Microbacterium azadirachtae;;;;;	0	0	0	0	0	0	0	0	0	0	0	0	0	0	0	0	0	0	0	0	0	0	0	0	0	0	0	0	0	0	0	0	0	0	0	0	0	0	0	0	0	0	0	0	0	0	0	0
627131	root;Bacteria;;;;Proteobacteria;;;Betaproteobacteria;;;;;;Burkholderiales;;;;;Alcaligenaceae;;;;Paralcaligenes;;;;Paralcaligenes ureilyticus;;;;;	0	0	0	0	0	0	0	0	0	0	0	0	0	0	0	0	0	0	0	0	0	0	0	0	0	0	0	0	0	0	0	0	0	0	0	0	0	0	0	0	0	0	0	0	0	0	0	0
630514	root;Bacteria;;;;Actinobacteria;;;Actinobacteria;;;;;;Micrococcales;;;;;Microbacteriaceae;;;;Microbacterium;;;;Microbacterium agarici;;;;;	0	0	0	0	0	0	0	0	0	0	0	0	0	0	0	0	0	0	0	0	0	0	0	0	0	0	0	0	0	0	0	0	0	0	0	0	0	0	0	0	0	0	0	0	0	0	0	0
630921	root;Bacteria;;;;Proteobacteria;;;Alphaproteobacteria;;;;;;Rhizobiales;;;;;Bradyrhizobiaceae;;;;Bradyrhizobium;;;;Bradyrhizobium embrapense;;;;;	0	0	0	0	0	0	0	0	0	0	0	0	0	0	0	0	0	0	0	0	0	0	0	0	0	0	0	0	0	0	0	0	0	0	0	0	0	0	0	0	0	0	0	0	0	0	0	0
634784	root;Bacteria;;;;Proteobacteria;;;Alphaproteobacteria;;;;;;Rhizobiales;;;;;Bradyrhizobiaceae;;;;Bradyrhizobium;;;;Bradyrhizobium algeriense;;;;;	0	0	0	0	0	0	0	0	0	0	0	0	0	0	0	0	0	0	0	0	0	0	0	0	0	0	0	0	0	0	0	0	0	0	0	0	0	0	0	0	0	0	0	0	0	0	0	0
640635	root;Bacteria;;;;Actinobacteria;;;Actinobacteria;;;;;;Micrococcales;;;;;Microbacteriaceae;;;;Microbacterium;;;;Microbacterium humi;;;;;	0	0	0	0	0	0	0	0	0	0	0	0	1.51e-06	0	0	0	0	0	0	0	0	0	0	0	0	0	0	0	0	0	0	0	0	0	0	0	0	0	0	0	0	0	0	0	0	0	0	0
643674	root;Bacteria;;;;Proteobacteria;;;Betaproteobacteria;;;;;;Burkholderiales;;;;;Alcaligenaceae;;;;Paenalcaligenes;;;;Paenalcaligenes hominis;;;;;	0	0	0	0	0	0	0	0	0	0	0	0	0	0	0	0	0	0	0	0	0	0	0	0	0	0	0	0	0	0	0	0	0	0	0	0	0	0	0	0	0	0	0	0	0	0	0	0
648885	root;Bacteria;;;;Proteobacteria;;;Alphaproteobacteria;;;;;;Rhizobiales;;;;;Methylobacteriaceae;;;;Methylobacterium;;;;Methylobacterium sp. MB200;;;;;	0	0	0	0	0	0	0	0	0	0	0	0	0	0	0	0	0	0	0	0	0	0	0	0	0	0	0	0	0	0	0	0	0	0	0	0	0	0	0	0	0	0	0	0	0	0	0	0
671622	root;Bacteria;;;;Actinobacteria;;;Actinobacteria;;;;;;Micrococcales;;;;;Microbacteriaceae;;;;Microbacterium;;;;Microbacterium yannicii;;;;;	0	0	0	0	0	0	0	0	0	0	0	0	1.51e-06	0	0	0	0	0	0	0	0	0	0	0	0	0	0	0	0	0	0	0	0	0	0	0	0	0	0	0	0	0	0	0	0	0	0	0
709803	root;Bacteria;;;;Proteobacteria;;;Alphaproteobacteria;;;;;;Rhizobiales;;;;;Bradyrhizobiaceae;;;;Bradyrhizobium;;;;Bradyrhizobium sp. TSA1;;;;;	0	0	0	0	0	0	0	0	0	0	0	0	0	0	0	0	0	0	0	0	0	0	0	0	0	0	0	0	0	0	0	0	0	0	0	0	0	0	0	0	0	0	0	0	0	0	0	0
709839	root;Bacteria;;;;Proteobacteria;;;Betaproteobacteria;;;;;;Burkholderiales;;;;;Oxalobacteraceae;;;;Noviherbaspirillum;;;;Noviherbaspirillum autotrophicum;;;;;	0	0	0	0	0	0	0	0	0	0	0	0	0	0	0	0	0	0	0	0	0	0	0	0	0	0	0	0	0	0	0	0	0	0	0	0	0	0	0	0	0	0	0	0	0	0	0	0
712383	root;Bacteria;;;;Actinobacteria;;;Actinobacteria;;;;;;Micrococcales;;;;;Microbacteriaceae;;;;Microbacterium;;;;Microbacterium sp. oral taxon 186;;;;;	0	0	0	0	0	0	0	0	0	0	0	0	0	0	0	0	0	0	0	0	0	0	0	0	0	0	0	0	0	0	0	0	0	0	0	0	0	0	0	0	0	0	0	0	0	0	0	0
722472	root;Bacteria;;;;Proteobacteria;;;Alphaproteobacteria;;;;;;Rhizobiales;;;;;Bradyrhizobiaceae;;;;Bradyrhizobium;;;;Bradyrhizobium lablabi;;;;;	0	0	0	0	0	0	0	0	0	0	0	0	0	0	0	0	0	0	0	0	0	0	0	0	0	0	0	0	0	0	0	0	0	0	0	0	0	0	0	0	0	0	0	0	0	0	0	0
739141	root;Bacteria;;;;Proteobacteria;;;Alphaproteobacteria;;;;;;Rhizobiales;;;;;Methylobacteriaceae;;;;Methylobacterium;;;;Methylobacterium sp. XJLW;;;;;	0	0	0	0	0	0	0	0	0	0	0	0	0	0	0	0	0	0	0	0	0	0	0	0	0	0	0	0	0	0	0	0	0	0	0	0	0	0	0	0	0	0	0	0	0	0	0	0
757424	root;Bacteria;;;;Proteobacteria;;;Betaproteobacteria;;;;;;Burkholderiales;;;;;Oxalobacteraceae;;;;Herbaspirillum;;;;Herbaspirillum seropedicae;;;;;	0	0	0	0	0	0	0	0	0	0	0	0	0	0	0	0	0	0	0	0	0	0	0	0	0	0	0	0	0	0	0	0	0	0	0	0	0	0	0	0	0	0	0	0	0	0	0	0
859657	root;Bacteria;;;;Proteobacteria;;;Betaproteobacteria;;;;;;Burkholderiales;;;;;Burkholderiaceae;;;;Ralstonia;;;;Ralstonia solanacearum;;;;;	0	0	0	0	0	0	0	0	0	0	0	0	0	0	0	0	0	0	0	0	0	0	0	0	0	0	0	0	0	0	0	0	0	0	0	0	0	0	0	0	0	0	0	0	0	0	0	0
863372	root;Bacteria;;;;Proteobacteria;;;Betaproteobacteria;;;;;;Burkholderiales;;;;;Oxalobacteraceae;;;;Herbaspirillum;;;;Herbaspirillum huttiense;;;;;	0	0	0	0	0	0	0	0	0	0	0	0	0	0	0	0	0	0	0	0	0	0	0	0	0	0	0	0	9.03e-07	0	0	0	0	0	0	0	0	0	0	0	0	0	0	0	0	0	0	0
904291	root;Bacteria;;;;Actinobacteria;;;Actinobacteria;;;;;;Micrococcales;;;;;Microbacteriaceae;;;;Microbacterium;;;;Microbacterium sediminis;;;;;	0	0	0	0	0	0	0	0	0	0	0	0	0	0	0	0	0	0	0	0	0	0	0	0	0	0	0	0	0	0	0	0	0	0	0	0	0	0	0	0	0	0	0	0	0	0	0	0
907261	root;Bacteria;;;;Proteobacteria;;;Betaproteobacteria;;;;;;Burkholderiales;;;;;Burkholderiaceae;;;;Ralstonia;;;;Ralstonia syzygii;;;;;	0	0	0	0	0	0	0	0	0	0	0	0	0	0	0	0	0	0	0	0	0	0	0	0	0	0	0	0	0	0	0	0	0	0	0	0	0	0	0	0	0	0	0	0	0	0	0	0
925818	root;Bacteria;;;;Proteobacteria;;;Alphaproteobacteria;;;;;;Rhizobiales;;;;;Methylobacteriaceae;;;;Methylobacterium;;;;Methylobacterium sp. AMS5;;;;;	0	0	0	0	0	0	0	0	0	0	0	0	0	0	0	0	0	0	0	0	0	0	0	0	0	0	0	0	0	0	0	0	0	0	0	0	0	0	0	0	0	0	0	0	0	0	0	0
989370	root;Bacteria;;;;Proteobacteria;;;Alphaproteobacteria;;;;;;Rhizobiales;;;;;Bradyrhizobiaceae;;;;Bradyrhizobium;;;;Bradyrhizobium manausense;;;;;	0	0	0	0	0	0	0	0	0	0	0	0	0	0	0	0	0	0	0	0	0	0	0	0	0	0	0	0	0	0	0	0	0	0	0	0	0	0	0	0	0	0	0	0	0	0	0	0
993073	root;Bacteria;;;;Actinobacteria;;;Actinobacteria;;;;;;Micrococcales;;;;;Microbacteriaceae;;;;Microbacterium;;;;Microbacterium enclense;;;;;	0	0	0	0	0	0	0	0	0	0	0	0	0	0	0	0	0	0	0	0	0	0	0	0	0	0	0	0	0	0	0	0	0	0	0	0	0	0	0	0	0	0	0	0	0	0	0	0
1016987	root;Bacteria;;;;Proteobacteria;;;Alphaproteobacteria;;;;;;Sphingomonadales;;;;;Sphingomonadaceae;;;;Novosphingobium;;;;Novosphingobium sp. THN1;;;;;	0	0	0	0	0	0	0	0	0	0	0	0	0	0	0	0	0	0	0	0	0	0	0	0	0	0	0	0	0	0	0	0	0	0	0	0	0	0	0	0	0	0	0	0	0	0	0	0
1031711	root;Bacteria;;;;Proteobacteria;;;Betaproteobacteria;;;;;;Burkholderiales;;;;;Burkholderiaceae;;;;Ralstonia;;;;Ralstonia solanacearum;;;;;	0	0	0	0	0	0	0	0	0	0	0	0	0	0	0	0	0	0	0	0	0	0	0	0	0	0	0	0	0	0	0	0	0	0	0	0	0	0	0	0	0	0	0	0	0	0	0	0
1038867	root;Bacteria;;;;Proteobacteria;;;Alphaproteobacteria;;;;;;Rhizobiales;;;;;Bradyrhizobiaceae;;;;Bradyrhizobium;;;;Bradyrhizobium sp. WSM3983;;;;;	0	0	0	0	0	0	0	0	0	0	0	0	0	0	0	0	0	0	0	0	0	0	0	1.22e-06	0	0	0	0	0	0	0	0	4.8e-07	0	0	0	0	0	0	0	0	0	0	0	0	0	0	0
1040986	root;Bacteria;;;;Proteobacteria;;;Alphaproteobacteria;;;;;;Rhizobiales;;;;;Phyllobacteriaceae;;;;Mesorhizobium;;;;Mesorhizobium sp. WSM3224;;;;;	0	0	0	0	0	0	0	0	0	0	0	0	0	0	0	0	0	0	0	0	0	0	0	0	0	0	0	0	0	0	0	0	0	0	0	0	0	0	0	0	0	0	0	0	0	0	0	0
1040988	root;Bacteria;;;;Proteobacteria;;;Alphaproteobacteria;;;;;;Rhizobiales;;;;;Bradyrhizobiaceae;;;;Bradyrhizobium;;;;Bradyrhizobium sp. WSM4349;;;;;	0	0	0	0	0	0	0	0	0	0	0	0	0	0	0	0	0	0	0	0	0	0	0	0	0	0	0	0	0	0	0	0	0	0	0	0	0	0	0	0	0	0	0	0	0	0	0	0
1040989	root;Bacteria;;;;Proteobacteria;;;Alphaproteobacteria;;;;;;Rhizobiales;;;;;Bradyrhizobiaceae;;;;Bradyrhizobium;;;;Bradyrhizobium sp. ARR65;;;;;	0	0	0	0	0	0	0	0	0	0	0	0	0	0	0	0	0	0	0	0	0	0	0	0	0	0	0	0	0	0	0	0	0	0	0	0	0	0	0	0	0	0	0	0	0	0	0	0
1072463	root;Bacteria;;;;Actinobacteria;;;Actinobacteria;;;;;;Micrococcales;;;;;Microbacteriaceae;;;;Microbacterium;;;;Microbacterium lemovicicum;;;;;	0	0	0	0	0	0	0	0	0	0	0	0	0	0	0	0	0	0	0	0	0	0	0	0	0	0	0	0	0	0	0	0	0	0	0	0	0	0	0	0	0	0	0	0	0	0	0	0
1078773	root;Bacteria;;;;Proteobacteria;;;Betaproteobacteria;;;;;;Burkholderiales;;;;;Oxalobacteraceae;;;;Herbaspirillum;;;;Herbaspirillum rubrisubalbicans;;;;;	0	0	0	0	0	0	0	0	0	0	0	0	0	0	0	0	0	0	0	0	0	0	0	0	0	0	0	0	0	0	0	0	0	0	0	0	0	0	0	0	0	0	0	0	0	0	0	0
1096546	root;Bacteria;;;;Proteobacteria;;;Alphaproteobacteria;;;;;;Rhizobiales;;;;;Methylobacteriaceae;;;;Methylobacterium;;;;Methylobacterium sp. GXF4;;;;;	0	0	0	0	0	0	0	0	0	0	0	0	0	0	0	0	0	0	0	0	0	0	0	0	0	0	0	0	0	0	0	0	0	0	0	0	0	0	0	0	0	0	0	0	0	0	0	0
1101192	root;Bacteria;;;;Proteobacteria;;;Alphaproteobacteria;;;;;;Rhizobiales;;;;;Methylobacteriaceae;;;;Methylobacterium;;;;Methylobacterium sp. 77;;;;;	0	0	0	0	0	0	0	0	0	0	0	0	0	0	0	0	0	0	0	0	0	0	0	0	0	0	0	0	0	0	0	0	0	0	0	0	0	0	0	0	0	0	0	0	0	0	0	0
1117702	root;Bacteria;;;;Proteobacteria;;;Alphaproteobacteria;;;;;;Sphingomonadales;;;;;Sphingomonadaceae;;;;Novosphingobium;;;;Novosphingobium fuchskuhlense;;;;;	0	0	0	0	0	0	0	0	0	0	0	0	0	0	0	0	0	0	0	0	0	0	0	0	0	0	0	0	0	0	0	0	0	0	0	0	0	0	0	0	0	0	0	0	0	0	0	0
1126616	root;Bacteria;;;;Proteobacteria;;;Alphaproteobacteria;;;;;;Rhizobiales;;;;;Bradyrhizobiaceae;;;;Bradyrhizobium;;;;Bradyrhizobium sp. DOA1;;;;;	0	0	0	0	0	0	0	0	0	0	0	0	0	0	0	0	0	0	0	0	0	0	0	0	0	0	0	0	0	0	0	0	0	0	0	0	0	0	0	0	0	0	0	0	0	0	0	0
1126627	root;Bacteria;;;;Proteobacteria;;;Alphaproteobacteria;;;;;;Rhizobiales;;;;;Bradyrhizobiaceae;;;;Bradyrhizobium;;;;Bradyrhizobium sp. DOA9;;;;;	0	0	0	0	0	0	0	0	0	0	0	0	0	0	0	0	0	0	0	0	0	0	0	0	0	0	0	0	0	0	0	0	0	0	0	0	0	0	0	0	0	0	0	0	0	0	0	0
1128178	root;Bacteria;;;;Proteobacteria;;;Alphaproteobacteria;;;;;;Rhizobiales;;;;;Bradyrhizobiaceae;;;;Bradyrhizobium;;;;Bradyrhizobium sp. CCBAU 43298;;;;;	0	0	0	0	0	0	0	0	0	0	0	0	0	0	0	0	0	0	0	0	0	0	0	0	0	0	0	0	0	0	0	0	0	0	0	0	0	0	0	0	0	0	0	0	0	0	0	0
1128180	root;Bacteria;;;;Proteobacteria;;;Alphaproteobacteria;;;;;;Rhizobiales;;;;;Bradyrhizobiaceae;;;;Bradyrhizobium;;;;Bradyrhizobium sp. CCBAU 15635;;;;;	0	0	0	0	0	0	0	0	0	0	0	0	0	0	0	0	0	0	0	0	0	0	0	0	0	0	0	0	0	0	0	0	0	0	0	0	0	0	0	0	0	0	0	0	0	0	0	0
1141884	root;Bacteria;;;;Proteobacteria;;;Alphaproteobacteria;;;;;;Rhizobiales;;;;;Methylobacteriaceae;;;;Methylobacterium;;;;Methylobacterium sp. 6HR-1;;;;;	0	0	0	0	0	0	0	0	0	0	0	0	0	0	0	0	0	0	0	0	0	0	0	0	0	0	0	0	0	0	0	0	0	0	0	0	0	0	0	0	0	0	0	0	0	0	0	0
1144305	root;Bacteria;;;;Proteobacteria;;;Alphaproteobacteria;;;;;;Sphingomonadales;;;;;Sphingomonadaceae;;;;Novosphingobium;;;;Novosphingobium sp. AP12;;;;;	0	0	0	0	0	0	0	0	0	0	0	0	0	0	0	0	0	0	0	0	0	0	0	0	0	0	0	0	0	0	0	0	0	0	0	0	0	0	0	0	0	0	0	0	0	0	0	0
1144342	root;Bacteria;;;;Proteobacteria;;;Betaproteobacteria;;;;;;Burkholderiales;;;;;Oxalobacteraceae;;;;Herbaspirillum;;;;Herbaspirillum sp. YR522;;;;;	0	0	0	0	0	0	0	0	0	0	0	0	0	0	0	0	0	0	0	0	0	0	0	0	0	0	0	0	0	0	0	0	0	0	0	0	0	0	0	0	0	0	0	0	0	0	0	0
1144344	root;Bacteria;;;;Proteobacteria;;;Alphaproteobacteria;;;;;;Rhizobiales;;;;;Bradyrhizobiaceae;;;;Bradyrhizobium;;;;Bradyrhizobium sp. YR681;;;;;	0	0	0	0	0	0	0	0	0	0	0	0	0	0	0	0	0	0	0	0	0	0	0	0	0	0	0	0	0	0	0	0	0	0	0	0	0	0	0	0	0	0	0	0	0	0	0	0
1151122	root;Bacteria;;;;Actinobacteria;;;Actinobacteria;;;;;;Micrococcales;;;;;Microbacteriaceae;;;;Microbacterium;;;;Microbacterium sp. 292MF;;;;;	0	0	0	0	0	0	0	0	0	0	0	0	0	0	0	0	0	0	0	0	0	0	0	0	0	0	0	0	0	0	0	0	0	0	0	0	0	0	0	0	0	0	0	0	0	9.43e-07	0	0
1156918	root;Bacteria;;;;Proteobacteria;;;Betaproteobacteria;;;;;;Burkholderiales;;;;;Alcaligenaceae;;;;Alcaligenes;;;;Alcaligenes faecalis;;;;;	0	0	0	0	0	0	0	0	0	0	0	0	0	0	0	0	0	0	0	0	0	0	0	0	0	0	0	0	0	0	0	0	0	0	0	0	0	0	0	0	0	0	0	0	0	0	0	0
1160710	root;Bacteria;;;;Actinobacteria;;;Actinobacteria;;;;;;Micrococcales;;;;;Microbacteriaceae;;;;Microbacterium;;;;Microbacterium laevaniformans;;;;;	0.000536177	0.000532093	0.000640102	0.000683945	0.000511343	0.000511343	0.000509973	0.000586537	0.000490867	0.000458775	0.000548963	0.000482387	0.000390153	0.000475276	0.000391056	0.000414305	2.57e-05	2.61e-05	0.000403946	9.42e-05	0.000237292	0.00010172	0.00025012	1.59e-05	3.23e-05	0.000185307	0.000224085	0.00027486	0.000259263	0.000273433	0.000171139	0.000616546	7.67e-05	0.00011543	9.61e-05	0.000193205	0.000289401	0.000200942	0.000235553	0.000100886	0.000249453	0.000517405	0.00070527	0.000680701	0.000527206	0.000648072	0.000558634	0.000590118
1165689	root;Bacteria;;;;Proteobacteria;;;Alphaproteobacteria;;;;;;Rhizobiales;;;;;Phyllobacteriaceae;;;;Mesorhizobium;;;;Mesorhizobium qingshengii;;;;;	0	0	0	0	0	0	0	0	0	0	0	0	0	0	0	0	0	0	0	0	0	0	0	0	0	0	0	0	0	0	0	0	0	0	0	0	0	0	0	0	0	0	0	0	0	0	0	0
1167456	root;Bacteria;;;;Proteobacteria;;;Alphaproteobacteria;;;;;;Rhizobiales;;;;;Bradyrhizobiaceae;;;;Bradyrhizobium;;;;Bradyrhizobium sp. SUTN9-2;;;;;	0	0	0	0	0	0	0	0	0	0	0	0	0	0	0	0	0	0	0	0	0	0	0	0	0	0	0	0	0	0	0	0	0	0	0	0	0	0	0	0	0	0	0	0	0	0	0	0
1175306	root;Bacteria;;;;Proteobacteria;;;Betaproteobacteria;;;;;;Burkholderiales;;;;;Oxalobacteraceae;;;;Herbaspirillum;;;;Herbaspirillum sp. GW103;;;;;	0	0	0	0	0	0	0	0	0	0	0	0	0	0	0	0	0	0	0	0	0	0	0	8.55e-06	0	0	0	0	0	0	0	0	0	0	0	0	0	0	0	0	0	0	0	0	0	0	0	0
1177594	root;Bacteria;;;;Actinobacteria;;;Actinobacteria;;;;;;Micrococcales;;;;;Microbacteriaceae;;;;Microbacterium;;;;Microbacterium sp. C448;;;;;	0	0	0	0	0	0	0	0	0	0	0	0	0	0	0	0	0	0	0	0	0	0	0	0	0	0	0	0	0	0	0	0	0	0	0	0	0	0	0	0	0	0	0	0	0	0	0	0
1187852	root;Bacteria;;;;Proteobacteria;;;Alphaproteobacteria;;;;;;Rhizobiales;;;;;Methylobacteriaceae;;;;Methylobacterium;;;;Methylobacterium tarhaniae;;;;;	0	0	0	0	0	0	0	0	0	0	0	0	0	0	0	0	0	0	0	0	0	0	0	0	0	0	0	0	0	0	0	0	0	0	0	0	0	0	0	0	0	0	0	0	0	0	0	0
1188263	root;Bacteria;;;;Proteobacteria;;;Alphaproteobacteria;;;;;;Rhizobiales;;;;;Bradyrhizobiaceae;;;;Bradyrhizobium;;;;Bradyrhizobium sp. WSM2254;;;;;	0	0	0	0	0	0	0	0	0	0	0	0	0	0	0	0	0	0	0	0	0	0	0	0	0	0	0	0	0	0	0	0	0	0	0	0	0	0	0	0	0	0	0	0	0	0	0	0
1206458	root;Bacteria;;;;Proteobacteria;;;Alphaproteobacteria;;;;;;Sphingomonadales;;;;;Sphingomonadaceae;;;;Novosphingobium;;;;Novosphingobium sp. MBES04;;;;;	0	0	0	0	0	0	0	0	0	0	0	0	0	1.43e-06	0	0	0	0	0	0	0	0	0	0	0	0	0	0	0	0	0	0	0	0	0	0	0	0	0	0	0	0	0	0	0	0	0	0
1208188	root;Bacteria;;;;Proteobacteria;;;Alphaproteobacteria;;;;;;Rhizobiales;;;;;Phyllobacteriaceae;;;;Mesorhizobium;;;;Mesorhizobium sp. ICMP 18942;;;;;	0	0	0	0	0	0	0	0	0	0	0	0	0	0	0	0	0	0	0	0	0	0	0	0	0	0	0	0	0	0	0	0	0	0	0	0	0	0	0	0	0	0	0	0	0	0	0	0
1209954	root;Bacteria;;;;Proteobacteria;;;Alphaproteobacteria;;;;;;Rhizobiales;;;;;Phyllobacteriaceae;;;;Mesorhizobium;;;;Mesorhizobium hawassense;;;;;	0	0	0	0	0	0	0	0	0	0	0	0	0	0	0	0	0	0	0	0	0	0	0	0	0	0	0	0	0	0	0	0	0	0	0	0	0	0	0	0	0	0	0	0	0	0	0	0
1217052	root;Bacteria;;;;Proteobacteria;;;Betaproteobacteria;;;;;;Burkholderiales;;;;;Burkholderiaceae;;;;Ralstonia;;;;Ralstonia sp. A12;;;;;	0	0	0	0	0	0	0	0	0	0	0	0	0	0	0	0	0	0	0	0	0	0	0	0	0	0	0	0	0	0	0	0	0	0	0	0	0	0	0	0	0	0	0	0	0	0	0	0
1218247	root;Bacteria;;;;Proteobacteria;;;Betaproteobacteria;;;;;;Burkholderiales;;;;;Burkholderiaceae;;;;Ralstonia;;;;Ralstonia sp. NT80;;;;;	0	0	0	0	0	0	0	0	0	0	0	0	0	0	0	0	0	0	0	0	0	0	0	0	0	0	0	0	0	0	0	0	0	0	0	0	0	0	0	0	0	0	0	0	0	0	0	0
1223566	root;Bacteria;;;;Proteobacteria;;;Alphaproteobacteria;;;;;;Rhizobiales;;;;;Bradyrhizobiaceae;;;;Bradyrhizobium;;;;Bradyrhizobium sp. CCGE-LA001;;;;;	0	0	0	0	0	0	0	0	0	0	0	0	0	0	0	0	0	0	0	0	0	0	0	0	0	0	0	0	0	0	0	0	0	0	0	0	0	0	0	0	0	0	0	0	0	0	0	0
1230476	root;Bacteria;;;;Proteobacteria;;;Alphaproteobacteria;;;;;;Rhizobiales;;;;;Bradyrhizobiaceae;;;;Bradyrhizobium;;;;Bradyrhizobium sp. DFCI-1;;;;;	0	0	0	0	0	0	0	0	0	0	0	0	0	0	0	0	0	0	0	0	0	0	0	0	0	0	0	0	0	0	0	0	0	0	0	0	0	0	0	0	0	0	0	0	0	0	0	0
1231063	root;Bacteria;;;;Actinobacteria;;;Actinobacteria;;;;;;Micrococcales;;;;;Microbacteriaceae;;;;Microbacterium;;;;Microbacterium gorillae;;;;;	0	0	0	0	0	0	0	0	0	0	0	0	0	0	0	0	0	0	0	0	0	0	0	0	0	0	0	0	0	0	0	0	0	0	0	0	0	0	0	0	0	0	0	0	0	0	0	0
1235457	root;Bacteria;;;;Proteobacteria;;;Betaproteobacteria;;;;;;Burkholderiales;;;;;Burkholderiaceae;;;;Ralstonia;;;;Ralstonia sp. AU12-08;;;;;	0	0	0	0	0	0	0	0	0	0	0	0	0	1.43e-06	0	0	0	0	0	0	0	0	0	0	0	0	0	0	0	0	0	0	0	0	0	0	0	0	0	0	0	0	0	0	0	0	0	0
1245469	root;Bacteria;;;;Proteobacteria;;;Alphaproteobacteria;;;;;;Rhizobiales;;;;;Bradyrhizobiaceae;;;;Bradyrhizobium;;;;Bradyrhizobium oligotrophicum;;;;;	0	0	0	0	0	0	0	0	0	0	0	0	0	0	0	0	0	0	0	0	0	0	0	0	0	0	0	0	0	0	0	0	0	0	0	0	0	0	0	0	0	0	0	0	0	0	0	0
1264675	root;Bacteria;;;;Proteobacteria;;;Betaproteobacteria;;;;;;Burkholderiales;;;;;Burkholderiaceae;;;;Ralstonia;;;;Ralstonia pickettii;;;;;	0	0	0	0	0	0	0	0	0	0	0	0	0	0	0	0	0	0	0	0	0	0	0	0	0	0	0	0	0	0	0	0	0	0	0	0	0	0	0	0	0	0	0	0	0	0	0	0
1333539	root;Bacteria;;;;Proteobacteria;;;Betaproteobacteria;;;;;;Burkholderiales;;;;;Burkholderiaceae;;;;Ralstonia;;;;Ralstonia solanacearum;;;;;	0	0	0	0	0	0	0	0	0	0	0	0	0	0	0	0	0	0	0	0	0	0	0	0	0	0	0	0	0	0	0	0	0	0	0	0	0	0	0	0	0	0	0	0	0	0	0	0
1348338	root;Bacteria;;;;Actinobacteria;;;Actinobacteria;;;;;;Micrococcales;;;;;Microbacteriaceae;;;;Leifsonia;;;;Leifsonia rubra;;;;;	0	0	0	0	0	0	0	0	0	0	0	0	0	0	0	0	0	0	0	0	0	0	0	0	0	0	0	0	0	0	0	0	0	0	0	0	0	0	0	0	0	0	0	0	0	0	0	0
1358026	root;Bacteria;;;;Actinobacteria;;;Actinobacteria;;;;;;Micrococcales;;;;;Microbacteriaceae;;;;Leifsonia;;;;Leifsonia aquatica;;;;;	0	0	0	0	0	0	0	0	0	0	0	0	0	0	0	0	0	0	0	0	0	0	0	0	0	0	0	0	0	0	0	0	0	0	0	0	0	0	0	0	0	0	0	0	0	0	0	0
1366050	root;Bacteria;;;;Proteobacteria;;;Betaproteobacteria;;;;;;Burkholderiales;;;;;Burkholderiaceae;;;;Ralstonia;;;;Ralstonia pickettii;;;;;	0	0	0	0	0	0	0	0	0	0	0	0	0	0	0	0	0	0	0	0	0	0	0	0	0	0	0	0	0	0	0	0	0	0	0	0	0	0	0	0	0	0	0	0	0	0	0	0
1449348	root;Bacteria;;;;Proteobacteria;;;Alphaproteobacteria;;;;;;Rhizobiales;;;;;Phyllobacteriaceae;;;;Mesorhizobium;;;;Mesorhizobium amorphae;;;;;	0	0	0	0	0	0	0	0	0	0	0	0	0	0	0	0	0	0	0	0	0	0	0	0	0	0	0	0	0	0	0	0	0	0	0	0	0	0	0	0	0	0	0	0	0	0	0	0
[truncated: 191 more columns]
